# Supplementary material
Source: PubMed Central journal article supplement (PMC3768281)

## Nickel-Catalyzed Suzuki–Miyaura Couplings in Green Solvents

Stephen D. Ramgren, Liana Hie, Yuxuan Ye, and Neil K. Garg\*  
*Department of Chemistry and Biochemistry, University of California  
Los Angeles, California 90095*

### Supporting Information – Table of Contents

|                                                                                                       |            |
|-------------------------------------------------------------------------------------------------------|------------|
| <b>Materials and Methods</b> .....                                                                    | <b>S2</b>  |
| <b>Experimental Procedures</b> .....                                                                  | <b>S3</b>  |
| <b>A. Synthesis of Aryl Carbamate, Sulfamate, and Mesylate Substrates</b> .....                       | <b>S3</b>  |
| <b>B. Screening of Green Solvents</b> .....                                                           | <b>S4</b>  |
| <b>C. Screening of Arylboron-Based Nucleophiles</b> .....                                             | <b>S9</b>  |
| <b>D. Cross-coupling Reactions of Aryl Halides</b> .....                                              | <b>S12</b> |
| <b>E. Cross-coupling Reactions of Aryl Carbamates, Sulfamates, and Mesylates</b> .....                | <b>S15</b> |
| <b>F. Heterocycle-Heterocycle Cross-Couplings of Aryl Halides</b> .....                               | <b>S18</b> |
| <b>G. Heterocycle-Heterocycle Cross-Couplings of Aryl Carbamates, Sulfamates, and Mesylates</b> ..... | <b>S21</b> |
| <b>H. Isolation Experiments</b> .....                                                                 | <b>S24</b> |
| <b>I. Cross-coupling Reactions Utilizing Microwave Heating</b> .....                                  | <b>S26</b> |
| <b>J. References</b> .....                                                                            | <b>S27</b> |
| <b>NMR Spectra</b> .....                                                                              | <b>S28</b> |
| <sup>1</sup> H NMR Spectra .....                                                                      | <b>S28</b> |
| <sup>13</sup> C NMR Spectra .....                                                                     | <b>S56</b> |

**Materials and Methods.** Unless stated otherwise, reactions were conducted in flame-dried glassware under an atmosphere of nitrogen using anhydrous solvents (either freshly distilled, purchased from a commercial source, or passed through activated alumina columns). DriSolv<sup>®</sup> anhydrous solvents were purchased from Acros Organics and used without further purification. Non-commercially available substrates were synthesized following protocols specified in Section A of the supporting information. Unless otherwise stated, commercially obtained reagents were used as received. Halogenated substrates were obtained from Combi-Blocks, Sigma-Aldrich, and Oakwood Products, Inc. NiCl<sub>2</sub>(PCy<sub>3</sub>)<sub>2</sub> was obtained from Strem Chemicals and Sigma-Aldrich. Finely powdered anhydrous K<sub>3</sub>PO<sub>4</sub> was obtained from Acros Organics. Boronic acids were obtained from Oakwood Products, Inc., Frontier Scientific, Inc. and Combi-Blocks. 2-Methyltetrahydrofuran (2-Me-THF), anhydrous, was obtained from Acros Organics (the water content was measured to be 0.035–0.13% using the Karl Fischer titration; water content of unopened bottle is reported to be 0.005%). *Tert*-amyl alcohol (*t*-amyl alcohol) was obtained from Sigma-Aldrich and used as received (the water content was measured to be 0.0053–0.25% using the Karl Fischer titration). Reaction temperatures were controlled using an IKAmag temperature modulator, and unless stated otherwise, reactions were performed at room temperature (rt, approximately 23 °C). Thin-layer chromatography (TLC) was conducted with EMD gel 60 F254 pre-coated plates (0.25 mm) and visualized using a combination of UV, anisaldehyde, ceric ammonium molybdate, iodine, vanillin, and potassium permanganate staining techniques. Silicycle Siliaflash P60 (particle size 0.040–0.063 mm) was used for flash column chromatography. <sup>1</sup>H NMR spectra were recorded on Bruker spectrometers (at 300, 400, 500, 600 MHz) and are reported relative to deuterated solvent signals. Data for <sup>1</sup>H NMR spectra are reported as follows: chemical shift (δ ppm), multiplicity, coupling constant (Hz) and integration. <sup>13</sup>C NMR spectra were recorded on Bruker Spectrometers (at 125 MHz). Data for <sup>13</sup>C NMR spectra are reported in terms of chemical shift. IR spectra were recorded on a Perkin-Elmer 100 spectrometer and are reported in terms of frequency of absorption (cm<sup>-1</sup>). High resolution mass spectra were obtained from the UC Irvine Mass Spectrometry Facility.

For more information about the ACS Green Chemistry Institute Pharmaceutical Roundtable Solvent Selection Guide, see:

<http://portal.acs.org/portal/PublicWebSite/greenchemistry/industriainnovation/roundtable/index.htm>

## Experimental Procedures

### A. Synthesis of Aryl Carbamate, Sulfamate, and Mesylate Substrates

*Note:* Supporting information for the synthesis of the aryl sulfamates, carbamates, and mesylates shown in Tables 1–2 and Figures 2–5 have previously been reported,<sup>1</sup> with the exception of pyrazole **SI-3**.

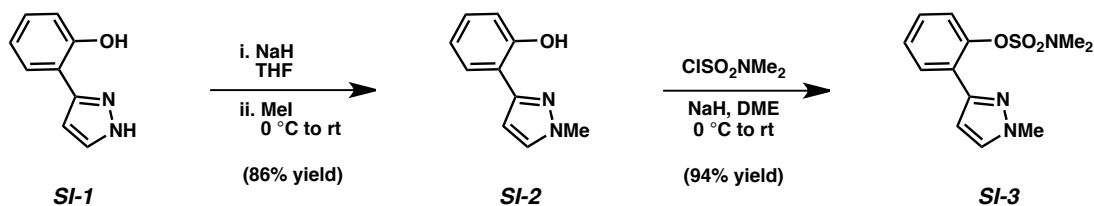

**Pyrazole SI-2.** To a round bottom flask charged with NaH (0.15 g, 3.74 mmol, 2.00 equiv, 60% dispersion in oil) was added a solution of pyrazole **SI-1** (0.30 g, 1.88 mmol, 1.00 equiv) in THF (11.1 mL) dropwise via cannula over several minutes at 0 °C. After stirring for 2 h, methyl iodide (0.12 mL, 1.88 mmol, 1.00 equiv) in THF (7.2 mL) was added dropwise over 1 min and the resulting mixture was stirred for 12 h while warming to rt. The volatiles were removed under reduced pressure and then, H<sub>2</sub>O (10 mL) and Et<sub>2</sub>O (10 mL) were added. The layers were separated, and the aqueous layer was extracted with Et<sub>2</sub>O (10 mL). The combined organic layers were washed successively with 1 M aqueous NaHCO<sub>3</sub> (10 mL) and brine (10 mL), dried over MgSO<sub>4</sub>, and concentrated under reduced pressure. The crude residue was purified by flash chromatography (3:1 Hexanes:EtOAc) to give pyrazole **SI-2** (0.22 g, 86% yield) as a yellow solid. *R*<sub>f</sub> 0.36 (3:1 Hexanes:EtOAc). Spectral data match those previously reported.<sup>2</sup>

**Sulfamate SI-3.** To a round bottom flask charged with NaH (0.78 g, 1.94 mmol, 1.20 equiv, 60% dispersion in oil) was added a solution of pyrazole **SI-2** (0.28 g, 1.62 mmol, 1.00 equiv) in DME (6.5 mL) dropwise via cannula over several minutes at 0 °C. Dimethylsulfamoyl chloride (0.17 mL, 1.56 mmol, 0.95 equiv) was added dropwise to the reaction vessel. The reaction was allowed to stir for 12 h while warming to rt. The reaction was quenched with H<sub>2</sub>O (0.3 mL) and the volatiles were removed under reduced pressure. Et<sub>2</sub>O (45 mL) and H<sub>2</sub>O (15 mL) were added

and the layers were separated. The organic layer was washed with 1 M aqueous KOH (2 x 15 mL). The combined aqueous layers were extracted with Et<sub>2</sub>O (3 x 30 mL). The combined organic layers were then washed with brine (30 mL), dried over MgSO<sub>4</sub>, and concentrated under reduced pressure. The crude residue was purified by flash chromatography (3:1 Hexanes:Acetone) to yield sulfamate **SI-3** as a yellow oil (0.42 g, 96% yield). *R<sub>f</sub>* 0.12 (1:1 Hexanes: EtOAc); <sup>1</sup>H NMR (600 MHz, CDCl<sub>3</sub>): δ 7.85 (dd, *J* = 7.2, 2.0, 1H), 7.54 (dd, *J* = 8.1, 1.5, 1H), 7.35 (d, *J* = 2.1, 1H), 7.32-7.27 (m, 2H), 6.69 (d, *J* = 2.2, 1H), 3.93 (s, 3H), 2.68 (s, 6H); <sup>13</sup>C NMR (150 MHz, CDCl<sub>3</sub>): δ 147.6, 147.0, 130.9, 129.7, 128.6, 127.1, 126.7, 122.5, 107.2, 39.1, 38.4; IR (film): 2941, 1460, 1366, 1191, 1156, 973, 740 cm<sup>-1</sup>; HRMS-ESI (*m/z*) [M+H]<sup>+</sup> calcd for C<sub>12</sub>H<sub>15</sub>N<sub>3</sub>O<sub>3</sub>S, 282.0912; found 282.0912.

## B. Screening of Green Solvents

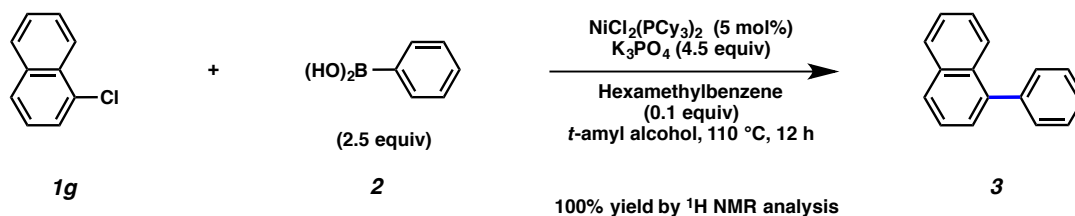

**Representative Procedure (coupling of 1g is used as an example). 3 (Table 2).** A 1-dram vial was charged with anhydrous powdered K<sub>3</sub>PO<sub>4</sub> (419.3 mg, 1.98 mmol, 4.50 equiv) and a magnetic stir bar. The vial and contents were flame-dried under reduced pressure, then allowed to cool under N<sub>2</sub>. Hexamethylbenzene (7.1 mg, 0.044 mmol, 0.10 equiv), boronic acid **2** (134.1 mg, 1.1 mmol, 2.50 equiv), NiCl<sub>2</sub>(PCy<sub>3</sub>)<sub>2</sub> (15.2 mg, 0.022 mmol, 5 mol%), and substrate **1g** (71.3 mg, 0.44 mmol, 1.00 equiv) were added. The vial was then evacuated and backfilled with N<sub>2</sub>. To the vial, *t*-amyl alcohol (1.5 mL) was added and then the vial was sealed with a Teflon-lined screw cap. The mixture was allowed to stir rapidly at 23 °C for 1 h, and then heated to 110 °C for 12 h. After cooling the reaction vessel to 23 °C, the reaction was transferred to a test tube containing 1 M aqueous HCl (2 mL). The layers were separated; the aqueous layer was extracted with EtOAc (3 x 2 mL). The combined organic layers were then washed with brine (2 mL), dried over MgSO<sub>4</sub>, and passed through a SiO<sub>2</sub> plug. The pad was washed with EtOAc (10 mL)

and the organic layers were concentrated under reduced pressure. The yield was determined by  $^1\text{H}$  NMR analysis with hexamethylbenzene as an internal standard. Spectral data match those previously reported.<sup>1c</sup>

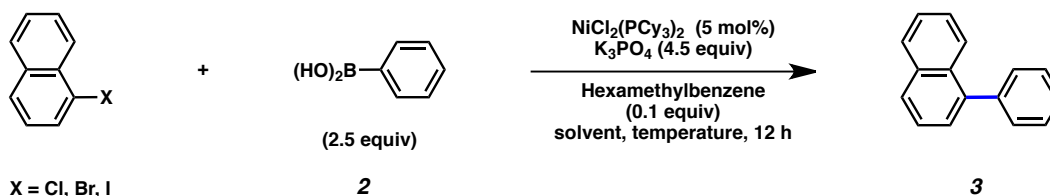

**Table 1.** Cross-coupling reactions of naphthyl halides in various solvents<sup>a</sup>

| Solvent Name<br>(temperature (°C)) | 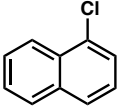<br><b>1g</b>           | <br><b>1h</b> | <br><b>1i</b> |
|------------------------------------|----------------------------------------------------------------------------------------------------------|-------------------------------------------------------------------------------------------------|--------------------------------------------------------------------------------------------------|
|                                    | $^1\text{H}$ NMR yield of desired product (%)<br>determined by hexamethylbenzene as an internal standard |                                                                                                 |                                                                                                  |
| <i>t</i> -butanol (83)             | 88 <sup>b</sup>                                                                                          | 100 <sup>b</sup> , 87 <sup>c</sup>                                                              | 90 <sup>b</sup> , 82 <sup>c</sup>                                                                |
| <i>t</i> -amyl alcohol (110)       | 100 <sup>b</sup>                                                                                         | 97 <sup>b</sup>                                                                                 | 100 <sup>b</sup>                                                                                 |
| 2-Me-THF (66)                      | 94 <sup>d</sup>                                                                                          | 92 <sup>d</sup>                                                                                 | 97 <sup>d</sup>                                                                                  |
| CPME (106)                         | 100 <sup>d</sup>                                                                                         | 90 <sup>d</sup>                                                                                 | 100 <sup>d</sup>                                                                                 |
| dimethyl isosorbide (110)          | 40 <sup>c</sup>                                                                                          | 42 <sup>c</sup>                                                                                 | 44 <sup>c</sup>                                                                                  |
| <i>i</i> -PrOAc (89)               | 90 <sup>c</sup>                                                                                          | 90 <sup>c</sup>                                                                                 | 95 <sup>c</sup>                                                                                  |
| DMSO (110)                         | 100 <sup>b</sup>                                                                                         | 91 <sup>b</sup>                                                                                 | 86 <sup>b</sup>                                                                                  |
| DMF (106)                          | 100 <sup>b</sup>                                                                                         | 90 <sup>b</sup>                                                                                 | 97 <sup>b</sup>                                                                                  |
| DMA (110)                          | 0 <sup>b</sup>                                                                                           | 0 <sup>b</sup>                                                                                  | 0 <sup>b</sup>                                                                                   |
| NMP (110)                          | 100 <sup>b</sup>                                                                                         | 69 <sup>b</sup>                                                                                 | 54 <sup>b</sup>                                                                                  |
| sulfolane (110)                    | 100 <sup>b</sup>                                                                                         | 98 <sup>b</sup>                                                                                 | 96 <sup>b</sup>                                                                                  |

<sup>a</sup> Reaction conditions, unless otherwise noted, the reaction was carried out with  $\text{NiCl}_2(\text{PCy}_3)_2$  complex (5 mol %), substrate **1g–i** (1.00 equiv), **2** (2.50 equiv),  $\text{K}_3\text{PO}_4$  (4.50 equiv), hexamethylbenzene (0.10 equiv), 12 h. <sup>b</sup> Distilled from desiccant. <sup>c</sup> Used without purification.

<sup>d</sup> Drysol<sup>®</sup>.

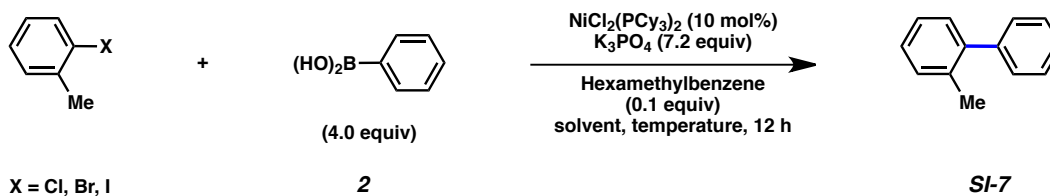
**Table 2.** Cross-coupling reactions of tolyl halides in selected solvents<sup>a</sup>

| Solvent Name<br>(temperature (°C)) | 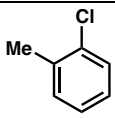<br><b>SI-4</b>           | <br><b>SI-5</b> | <br><b>SI-6</b> |
|------------------------------------|------------------------------------------------------------------------------------------------------------|---------------------------------------------------------------------------------------------------|----------------------------------------------------------------------------------------------------|
|                                    | <sup>1</sup> H NMR yield of desired product (%)<br>determined by hexamethylbenzene as an internal standard |                                                                                                   |                                                                                                    |
| <i>t</i> -butanol (83)             | 98 <sup>b</sup> , 92 <sup>c</sup>                                                                          | 99 <sup>b</sup> , 100 <sup>c</sup>                                                                | 97 <sup>b</sup> , 95 <sup>c</sup>                                                                  |
| 2-Me-THF (80)                      | 93 <sup>d</sup>                                                                                            | 99 <sup>d</sup>                                                                                   | 99 <sup>d</sup>                                                                                    |
| CPME (106)                         | 96 <sup>d</sup>                                                                                            | 96 <sup>d</sup>                                                                                   | 100 <sup>d</sup>                                                                                   |
| <i>i</i> -PrOAc (89)               | 90 <sup>c</sup>                                                                                            | 91 <sup>c</sup>                                                                                   | 85 <sup>c</sup>                                                                                    |

<sup>a</sup> Reaction conditions, unless otherwise noted, the reaction was carried out with  $\text{NiCl}_2(\text{PCy}_3)_2$  complex (10 mol %), substrate **SI-4–6** (1.00 equiv), **2** (4.00 equiv),  $\text{K}_3\text{PO}_4$  (7.20 equiv), hexamethylbenzene (0.1 equiv), 12 h. <sup>b</sup> Distilled from desiccant. <sup>c</sup> Used without purification.

<sup>d</sup> Drysol<sup>®</sup>.

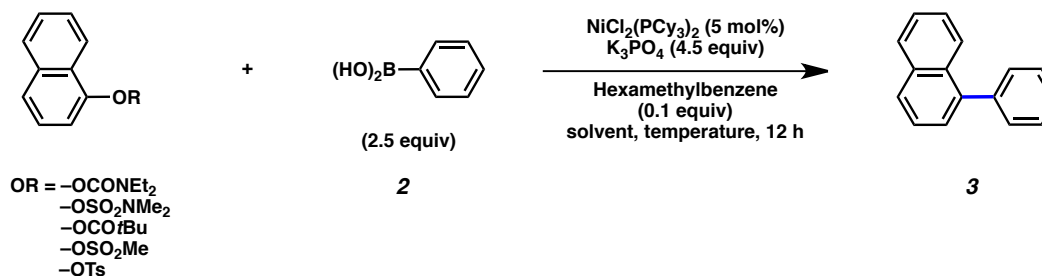
**Table 3.** Cross-coupling reactions of naphthol derivatives in various solvents<sup>a</sup>

| Solvent Name<br>(temperature (°C)) | 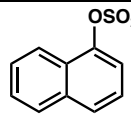<br><b>1a</b>           | <br><b>1b</b> |
|------------------------------------|------------------------------------------------------------------------------------------------------------|----------------------------------------------------------------------------------------------------|
|                                    | <sup>1</sup> H NMR yield of desired product (%)<br>determined by hexamethylbenzene as an internal standard |                                                                                                    |
| <i>t</i> -butanol (100)            | 100 <sup>c,d</sup>                                                                                         | 100 <sup>b,c,d</sup>                                                                               |
| <i>n</i> -butanol (110)            | 0 <sup>c,d</sup>                                                                                           | 0 <sup>b,c,d</sup>                                                                                 |

**Table 3.** Cross-coupling reactions of naphthol derivatives in various solvents (continued)<sup>a</sup>

| Solvent Name<br>(temperature (°C))  | 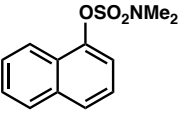<br><b>1a</b>             | <br><b>1b</b> |
|-------------------------------------|------------------------------------------------------------------------------------------------------------|--------------------------------------------------------------------------------------------------|
|                                     | <sup>1</sup> H NMR yield of desired product (%)<br>determined by hexamethylbenzene as an internal standard |                                                                                                  |
| 2-butanol (110)                     | 0 <sup>c,d</sup>                                                                                           | 0 <sup>b,c,d,f</sup>                                                                             |
| <i>i</i> -butanol (110)             | 3 <sup>c</sup> , 2 <sup>d</sup>                                                                            | 0 <sup>b,c,d,g</sup>                                                                             |
| <i>t</i> -amyl alcohol (100)        | 100 <sup>c</sup>                                                                                           | 88 <sup>b,c</sup>                                                                                |
| toluene (110)                       | 100 <sup>b</sup>                                                                                           | 100 <sup>b</sup>                                                                                 |
| xylenes (110)                       | 100 <sup>c,d</sup>                                                                                         | 100 <sup>b,c,d,g</sup>                                                                           |
| triethylamine (110)                 | 99 <sup>c</sup> , 100 <sup>d</sup>                                                                         | 91 <sup>b,c</sup> , 76 <sup>b,d</sup>                                                            |
| pyridine (110)                      | 70 <sup>c</sup> , 67 <sup>d</sup>                                                                          | 0 <sup>b,c,g</sup> , 0 <sup>b,d,g</sup>                                                          |
| 2-Me-THF (100)                      | 100 <sup>e</sup>                                                                                           | 97 <sup>b,e</sup>                                                                                |
| CPME (110)                          | 100 <sup>e</sup>                                                                                           | 100 <sup>b,e,g</sup>                                                                             |
| MTBE (80)                           | 100 <sup>e</sup>                                                                                           | 100 <sup>b,e</sup>                                                                               |
| 1,2-dimethoxyethane (110)           | 100 <sup>b</sup>                                                                                           | 92 <sup>b</sup>                                                                                  |
| 1,4-dioxane (110)                   | 100 <sup>c,d</sup>                                                                                         | 58 <sup>b,c</sup> , 75 <sup>b,d</sup>                                                            |
| diglyme                             | 100 <sup>c</sup> , 54 <sup>d</sup>                                                                         | 93 <sup>b,c</sup> , 16 <sup>b,d</sup>                                                            |
| EtOAc (100)                         | 100 <sup>c,d</sup>                                                                                         | 100 <sup>b,c,d</sup>                                                                             |
| <i>n</i> -butyl acetate (110)       | 100 <sup>d</sup>                                                                                           | 97 <sup>b,d</sup>                                                                                |
| <i>i</i> -PrOAc (110)               | 100 <sup>d</sup>                                                                                           | 99 <sup>b,d</sup>                                                                                |
| <i>n</i> -amyl acetate (110)        | 0 <sup>d</sup>                                                                                             | 0 <sup>b,d</sup>                                                                                 |
| acetone (75)                        | 96 <sup>c</sup> , 99 <sup>d</sup>                                                                          | 68 <sup>b,c</sup> , 54 <sup>b,d</sup>                                                            |
| 2-butanone (79)                     | 99 <sup>c</sup>                                                                                            | 69 <sup>b,c</sup>                                                                                |
| methyl <i>i</i> -butyl ketone (110) | 97 <sup>c,d</sup>                                                                                          | 97 <sup>b,c</sup> , 71 <sup>b,d</sup>                                                            |
| cyclohexanone (110)                 | 100 <sup>c</sup>                                                                                           | 100 <sup>b,c</sup>                                                                               |
| acetonitrile (100)                  | 99 <sup>b</sup>                                                                                            | 0 <sup>b</sup>                                                                                   |
| DMSO (110)                          | 0 <sup>c</sup>                                                                                             | 0 <sup>b,c</sup>                                                                                 |
| DMA (110)                           | 0 <sup>c</sup>                                                                                             | 0 <sup>b,c</sup>                                                                                 |
| DMF (106)                           | 97 <sup>b</sup>                                                                                            | 86 <sup>b</sup>                                                                                  |
| NMP (110)                           | 100 <sup>c</sup>                                                                                           | 43 <sup>b,c</sup>                                                                                |
| sulfolane (110)                     | 100 <sup>c</sup>                                                                                           | 64 <sup>b,c</sup>                                                                                |
| <i>i</i> -octane (95)               | 86 <sup>c</sup> , 95 <sup>d</sup>                                                                          | 69 <sup>b,c</sup> , 73 <sup>b,d</sup>                                                            |
| <i>n</i> -heptane (98)              | 100 <sup>c,d</sup>                                                                                         | 76 <sup>b,c</sup> , 77 <sup>b,d</sup>                                                            |
| cyclohexane (80)                    | 96 <sup>c</sup> , 90 <sup>d</sup>                                                                          | 78 <sup>b,c</sup> , 50 <sup>b,d</sup>                                                            |
| 1,2-dichloroethane (100)            | 0 <sup>c</sup>                                                                                             | 0 <sup>b,c</sup>                                                                                 |

<sup>a</sup> Reaction conditions, unless otherwise noted, the reaction was carried out with NiCl<sub>2</sub>(PCy<sub>3</sub>)<sub>2</sub> complex (5 mol %), substrate **1a–b** (1.00 equiv), **2** (2.50 equiv), K<sub>3</sub>PO<sub>4</sub> (4.50 equiv), hexamethylbenzene (0.10 equiv), 12 h. <sup>b</sup> The reaction was carried out with NiCl<sub>2</sub>(PCy<sub>3</sub>)<sub>2</sub> complex (10 mol %), substrate **1a–b** (1.00 equiv), **2** (4.00 equiv), K<sub>3</sub>PO<sub>4</sub> (7.20 equiv), hexamethylbenzene (0.10 equiv), 12 h. <sup>c</sup> Distilled from desiccant. <sup>d</sup> Used without purification. <sup>e</sup> Drysol<sup>®</sup>. <sup>f</sup> The reaction was performed at 120 °C. <sup>g</sup> The reaction was performed at 130 °C.

**Table 4.** Cross-coupling reactions of naphthyl mesylate, tosylate, and pivalates in selected green solvents<sup>a</sup>

| Solvent Name<br>(temperature (°C)) | 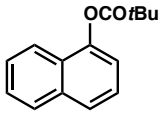<br><b>1c</b>             | <br><b>1d</b> | <br><b>1e</b> |
|------------------------------------|------------------------------------------------------------------------------------------------------------|-------------------------------------------------------------------------------------------------|--------------------------------------------------------------------------------------------------|
|                                    | <sup>1</sup> H NMR yield of desired product (%)<br>determined by hexamethylbenzene as an internal standard |                                                                                                 |                                                                                                  |
| <i>t</i> -butanol (82)             | 100 <sup>b,c</sup> , 53 <sup>b,d</sup>                                                                     | 90 <sup>c</sup> , 90 <sup>d</sup>                                                               | 100 <sup>c</sup> , 95 <sup>d</sup>                                                               |
| 2-Me-THF (66)                      | 99 <sup>b,e</sup>                                                                                          | 95 <sup>e</sup>                                                                                 | 96 <sup>e</sup>                                                                                  |
| CPME (106)                         | 100 <sup>b,e</sup>                                                                                         | 100 <sup>e</sup>                                                                                | 84 <sup>e</sup>                                                                                  |
| <i>i</i> -PrOAc (89)               | 92 <sup>b,d</sup>                                                                                          | 95 <sup>d</sup>                                                                                 | 100 <sup>d</sup>                                                                                 |

<sup>a</sup> Reaction conditions, unless otherwise noted, the reaction was carried out with NiCl<sub>2</sub>(PCy<sub>3</sub>)<sub>2</sub> complex (5 mol %), substrate **1c–e** (1.00 equiv), **2** (2.50 equiv), K<sub>3</sub>PO<sub>4</sub> (4.50 equiv), hexamethylbenzene (0.10 equiv), 12 h. <sup>b</sup> The reaction was carried out with NiCl<sub>2</sub>(PCy<sub>3</sub>)<sub>2</sub> complex (10 mol %), substrate **1c–e** (1.00 equiv), **2** (4.00 equiv), K<sub>3</sub>PO<sub>4</sub> (7.20 equiv), hexamethylbenzene (0.10 equiv), 12 h. <sup>c</sup> Distilled from desiccant. <sup>d</sup> Used without purification. <sup>e</sup> Drysol<sup>®</sup>.

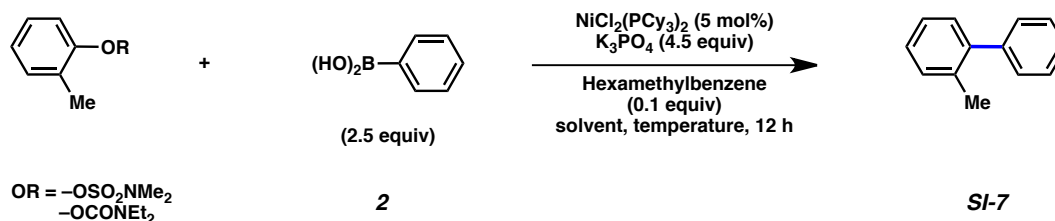**Table 5.** Cross-coupling reactions of *o*-methylphenyl sulfamate and carbamate in selected solvents<sup>a</sup>

| Solvent Name<br>(temperature (°C)) | 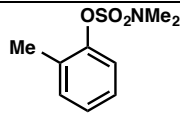<br><b>SI-8</b>         | <br><b>SI-9</b> |
|------------------------------------|------------------------------------------------------------------------------------------------------------|------------------------------------------------------------------------------------------------------|
|                                    | <sup>1</sup> H NMR yield of desired product (%)<br>determined by hexamethylbenzene as an internal standard |                                                                                                      |
| <i>t</i> -butanol (100)            | 78 <sup>c</sup> , 68 <sup>d</sup>                                                                          | 45 <sup>b,c</sup> , 50 <sup>b,d</sup>                                                                |
| <i>t</i> -amyl alcohol (120)       | 100 <sup>d</sup>                                                                                           | 45 <sup>b,d</sup>                                                                                    |
| toluene (110)                      | 92 <sup>b</sup>                                                                                            | 61 <sup>b</sup>                                                                                      |
| xylenes (110)                      | 100 <sup>c</sup>                                                                                           | 69 <sup>b,c,f</sup>                                                                                  |



**Table 5.** Cross-coupling reactions of *o*-methylphenyl sulfamate and carbamate in selected solvents (continued)<sup>a</sup>

| Solvent Name<br>(temperature (°C)) | 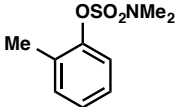<br><b>SI-8</b>           | <br><b>SI-9</b> |
|------------------------------------|------------------------------------------------------------------------------------------------------------|----------------------------------------------------------------------------------------------------|
|                                    | <sup>1</sup> H NMR yield of desired product (%)<br>determined by hexamethylbenzene as an internal standard |                                                                                                    |
| triethylamine (110)                | 52 <sup>c</sup>                                                                                            | 29 <sup>b,c</sup>                                                                                  |
| 2-Me-THF (100)                     | 97 <sup>e</sup>                                                                                            | 88 <sup>b,e</sup>                                                                                  |
| CPME (110)                         | 96 <sup>e</sup>                                                                                            | 58 <sup>b,e,f</sup>                                                                                |
| MTBE (80)                          | 99 <sup>e</sup>                                                                                            | 60 <sup>b,e</sup>                                                                                  |
| 1,2-dimethoxyethane (110)          | 99 <sup>b</sup>                                                                                            | 65 <sup>b</sup>                                                                                    |
| 1,4-dioxane (110)                  | 99 <sup>c</sup> , 90 <sup>d</sup>                                                                          | 57 <sup>b,c</sup> , 34 <sup>b,d</sup>                                                              |
| EtOAc (100)                        | 33 <sup>c</sup> , 26 <sup>d</sup>                                                                          | 17 <sup>b,c</sup> , 16 <sup>b,d</sup>                                                              |
| <i>n</i> -butyl acetate (110)      | 20 <sup>d</sup>                                                                                            | 15 <sup>b,d,f</sup>                                                                                |
| <i>i</i> -PrOAc (110)              | 78 <sup>d</sup>                                                                                            | 70 <sup>b,d</sup>                                                                                  |
| acetone (75)                       | 98 <sup>c</sup>                                                                                            | 5 <sup>b,c</sup>                                                                                   |

<sup>a</sup> Reaction conditions, unless otherwise noted, the reaction was carried out with NiCl<sub>2</sub>(PCy<sub>3</sub>)<sub>2</sub> complex (5 mol %), substrate **SI-8-9** (1.00 equiv), **2** (2.50 equiv), K<sub>3</sub>PO<sub>4</sub> (4.50 equiv), hexamethylbenzene (0.10 equiv), 12 h. <sup>b</sup> The reaction was carried out with NiCl<sub>2</sub>(PCy<sub>3</sub>)<sub>2</sub> complex (10 mol %), substrate **SI-8-9** (1 equiv), **2** (4.00 equiv), K<sub>3</sub>PO<sub>4</sub> (7.20 equiv), hexamethylbenzene (0.10 equiv), 12 h. <sup>c</sup> Distilled from desiccant. <sup>d</sup> Used without purification. <sup>e</sup> Drysol<sup>®</sup>. <sup>f</sup> The reaction was performed at 130 °C.

### C. Screening of Arylboron-Based Nucleophiles

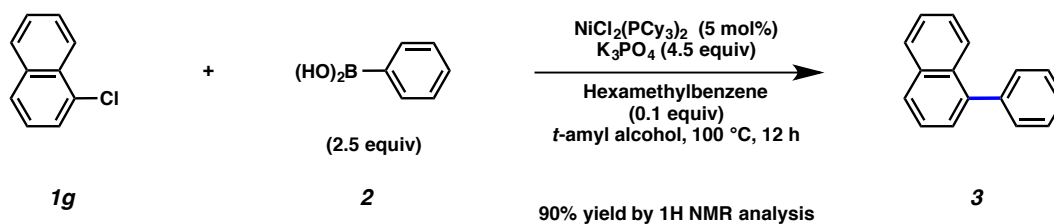

**Representative Procedure (coupling of **1g** is used as an example). **3** (Table 2).** A 1-dram vial was charged with anhydrous powdered K<sub>3</sub>PO<sub>4</sub> (419.3 mg, 1.98 mmol, 4.50 equiv) and a magnetic stir bar. The vial and contents were flame-dried under reduced pressure, then allowed to cool under N<sub>2</sub>. Hexamethylbenzene (7.1 mg, 0.044 mmol, 0.10 equiv), boronic acid **2** (134.1 mg, 1.1 mmol, 2.50 equiv), NiCl<sub>2</sub>(PCy<sub>3</sub>)<sub>2</sub> (15.2 mg, 0.022 mmol, 5 mol%), and substrate **1g** (71.3

mg, 0.44 mmol, 1.00 equiv) were added. The vial was then evacuated and backfilled with N<sub>2</sub>. To the vial, *t*-amyl alcohol (1.5 mL) was added and then the vial was sealed with a Teflon-lined screw cap. The mixture was allowed to stir rapidly at 23 °C for 1 h, and then heated to 100 °C for 12 h. The reaction vessel was cooled to 23 °C, then transferred to a test tube containing 1 M aqueous HCl (2 mL). The layers were separated; the aqueous layer was extracted with EtOAc (3 x 2 mL). The combined organic layers were then washed with brine (2 mL), dried over MgSO<sub>4</sub>, and passed through a SiO<sub>2</sub> plug. The pad was washed with EtOAc (10 mL) and the organic layers were concentrated under reduced pressure. The yield was determined by <sup>1</sup>H NMR analysis with hexamethylbenzene as an internal standard. Spectral data match those previously reported.<sup>1e</sup>

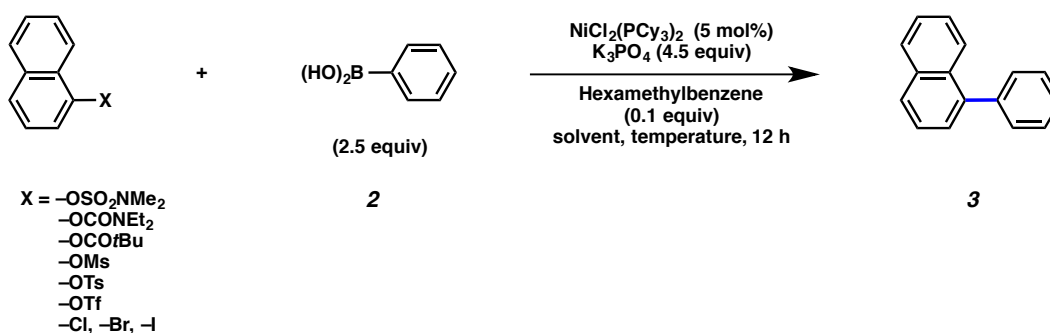

**Table 6.** Arylboron-Based Nucleophile Phenylboronic Acid<sup>a</sup>

| X                                               | <sup>1</sup> H NMR yield of desired product (%)<br>determined by hexamethylbenzene as an internal standard |                               |
|-------------------------------------------------|------------------------------------------------------------------------------------------------------------|-------------------------------|
|                                                 | <i>t</i> -amyl alcohol <sup>b</sup> (100 °C)                                                               | 2-Me-THF <sup>c</sup> (66 °C) |
| OSO <sub>2</sub> NMe <sub>2</sub> ( <b>1a</b> ) | 100                                                                                                        | 100                           |
| OCONEt <sub>2</sub> ( <b>1b</b> )               | 57                                                                                                         | 50                            |
| OCOtBu ( <b>1c</b> )                            | 94                                                                                                         | 100                           |
| OMs ( <b>1d</b> )                               | 97                                                                                                         | 95                            |
| OTs ( <b>1e</b> )                               | 100                                                                                                        | 98                            |
| OTf ( <b>1f</b> )                               | 100                                                                                                        | 100                           |
| Cl ( <b>1g</b> )                                | 100                                                                                                        | 94                            |
| Br ( <b>1h</b> )                                | 97                                                                                                         | 92                            |
| I ( <b>1i</b> )                                 | 100                                                                                                        | 97                            |

<sup>a</sup> Reaction conditions, unless otherwise noted, the reaction was carried out with NiCl<sub>2</sub>(PCy<sub>3</sub>)<sub>2</sub> complex (5 mol %), substrate **1a–i** (1.00 equiv), **2** (2.50 equiv), K<sub>3</sub>PO<sub>4</sub> (4.50 equiv), hexamethylbenzene (0.10 equiv), 12 h. <sup>b</sup> Used without purification. <sup>c</sup> Drysolv<sup>®</sup>.

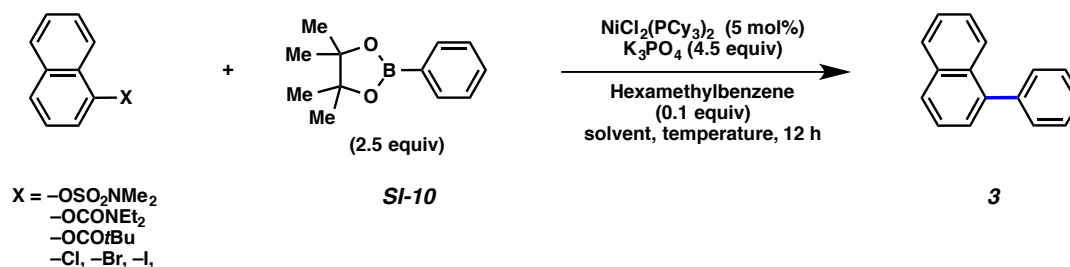
**Table 8.** Arylboron-Based Nucleophile Pinacol Ester<sup>a</sup>

| X                                               | <sup>1</sup> H NMR yield of desired product (%)<br>determined by hexamethylbenzene as an internal standard |                                |
|-------------------------------------------------|------------------------------------------------------------------------------------------------------------|--------------------------------|
|                                                 | <i>t</i> -amyl alcohol <sup>b</sup> (120 °C)                                                               | 2-Me-THF <sup>c</sup> (100 °C) |
| OSO <sub>2</sub> NMe <sub>2</sub> ( <b>1a</b> ) | 100                                                                                                        | 0                              |
| OCONEt <sub>2</sub> ( <b>1b</b> )               | 97                                                                                                         | 0                              |
| OCOtBu ( <b>1c</b> )                            | 99                                                                                                         | 75                             |
| Cl ( <b>1g</b> )                                | 96                                                                                                         | 0                              |
| Br ( <b>1h</b> )                                | 98                                                                                                         | 0                              |
| I ( <b>1i</b> )                                 | 93                                                                                                         | 0                              |

<sup>a</sup> Reaction conditions, unless otherwise noted, the reaction was carried out with NiCl<sub>2</sub>(PCy<sub>3</sub>)<sub>2</sub> complex (5 mol %), substrate **1a–c**, **1g–i** (1.00 equiv), **2** (2.50 equiv), K<sub>3</sub>PO<sub>4</sub> (4.50 equiv), hexamethylbenzene (0.10 equiv), 12 h. <sup>b</sup> Used without purification. <sup>c</sup> Drysol<sup>®</sup>.

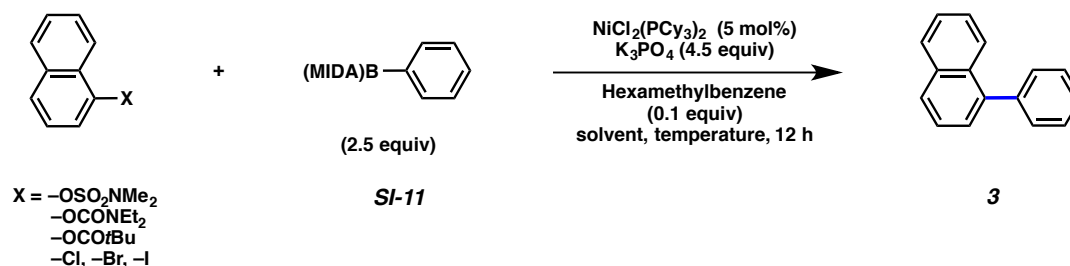
**Table 9.** Arylboron-Based Nucleophile MIDA (N-Methyliminodiacetic Acid)<sup>a</sup>

| X                                               | <sup>1</sup> H NMR yield of desired product (%)<br>determined by hexamethylbenzene as an internal standard |                               |
|-------------------------------------------------|------------------------------------------------------------------------------------------------------------|-------------------------------|
|                                                 | <i>t</i> -amyl alcohol <sup>b</sup> (100 °C)                                                               | 2-Me-THF <sup>c</sup> (66 °C) |
| OSO <sub>2</sub> NMe <sub>2</sub> ( <b>1a</b> ) | 0                                                                                                          | 0                             |
| OCONEt <sub>2</sub> ( <b>1b</b> )               | 0                                                                                                          | 0                             |
| OCOtBu ( <b>1c</b> )                            | 0                                                                                                          | 0                             |
| Cl ( <b>1g</b> )                                | 0                                                                                                          | 0                             |
| Br ( <b>1h</b> )                                | 0                                                                                                          | 0                             |
| I ( <b>1i</b> )                                 | 0                                                                                                          | 0                             |

<sup>a</sup> Reaction conditions, unless otherwise noted, the reaction was carried out with NiCl<sub>2</sub>(PCy<sub>3</sub>)<sub>2</sub> complex (5 mol %), substrate **1a–c**, **1g–i** (1.00 equiv), **2** (2.50 equiv), K<sub>3</sub>PO<sub>4</sub> (4.50 equiv), hexamethylbenzene (0.10 equiv), 12 h. <sup>b</sup> Used without purification. <sup>c</sup> Drysolv<sup>®</sup>.

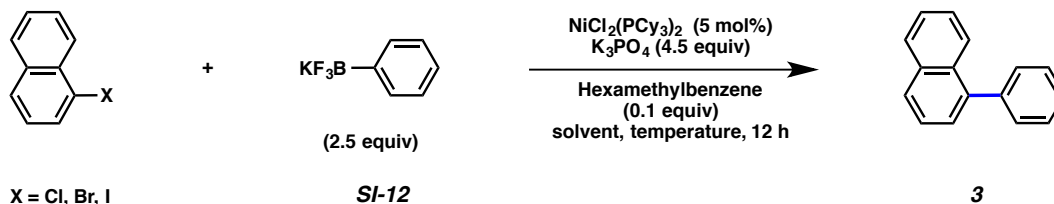

**Table 10.** Arylboron-Based Nucleophile Potassium Aryl Trifluoroborate<sup>a</sup>

| X                | <sup>1</sup> H NMR yield of desired product (%)<br>determined by hexamethylbenzene as an internal standard |                               |
|------------------|------------------------------------------------------------------------------------------------------------|-------------------------------|
|                  | <i>t</i> -amyl alcohol <sup>b</sup> (100 °C)                                                               | 2-Me-THF <sup>c</sup> (66 °C) |
| Cl ( <b>1g</b> ) | 0                                                                                                          | 0                             |
| Br ( <b>1h</b> ) | 0                                                                                                          | 0                             |
| I ( <b>1i</b> )  | 0                                                                                                          | 0                             |

<sup>a</sup> Reaction conditions, unless otherwise noted, the reaction was carried out with NiCl<sub>2</sub>(PCy<sub>3</sub>)<sub>2</sub> complex (5 mol %), substrate **1g–i** (1.00 equiv), **2** (2.50 equiv), K<sub>3</sub>PO<sub>4</sub> (4.50 equiv), hexamethylbenzene (0.10 equiv), 12 h. <sup>b</sup> Used without purification. <sup>c</sup> Drysolv<sup>®</sup>.

#### D. Cross-coupling Reactions of Aryl Halides

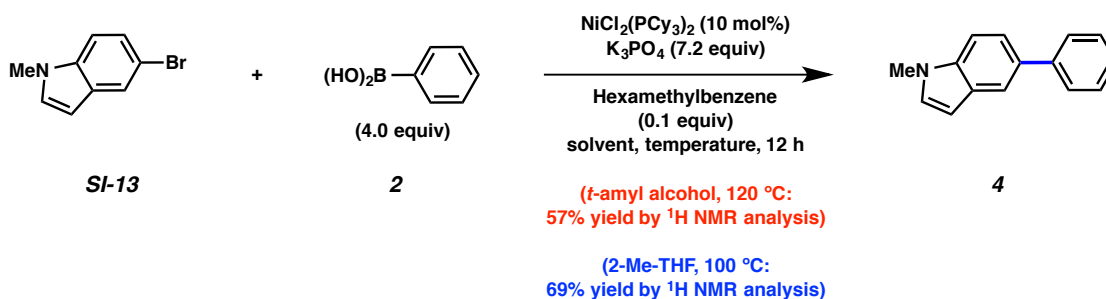

**Representative Procedure (coupling of SI-13 is used as an example). 4 (Figure 2).** A 1-dram vial was charged with anhydrous powdered K<sub>3</sub>PO<sub>4</sub> (831.4 mg, 7.20 mmol, 7.20 equiv) and a magnetic stir bar. The vial and contents were flame-dried under reduced pressure, then allowed to cool under N<sub>2</sub>. Hexamethylbenzene (8.8 mg, 0.054 mmol, 0.10 equiv), boronic acid **2** (265.3 mg, 2.20 mmol, 4.0 equiv), NiCl<sub>2</sub>(PCy<sub>3</sub>)<sub>2</sub> (37.5 mg, 0.054 mmol, 10 mol%), and indole **SI-13** (112.8 mg, 0.54 mmol, 1.00 equiv) were added. The vial was then evacuated and backfilled with

N<sub>2</sub>. To the vial, solvent (1.5 mL) was added and then the vial was sealed with a Teflon-lined screw cap. The mixture was allowed to stir rapidly at 23 °C for 1 h, and then heated to 100 °C (2-Me-THF) or 120 °C (*t*-amyl alcohol) for 12 h. After cooling the reaction to 23 °C, the reaction was transferred to a test tube containing 1 M aqueous HCl (2 mL). The layers were separated; the aqueous layer was extracted with EtOAc (3 x 2 mL). The combined organic layers were then washed with brine (2 mL), dried over MgSO<sub>4</sub>, passed through a SiO<sub>2</sub> plug. The pad was washed with EtOAc (10 mL) and the organic layers were concentrated under reduced pressure. The yield was determined by <sup>1</sup>H NMR analysis with hexamethylbenzene as an internal standard. Spectral data match those previously reported.<sup>1b</sup>

*Any modifications of the conditions shown in this representative procedure are specified in the following schemes, which depict all of the results shown in Figure 2.*

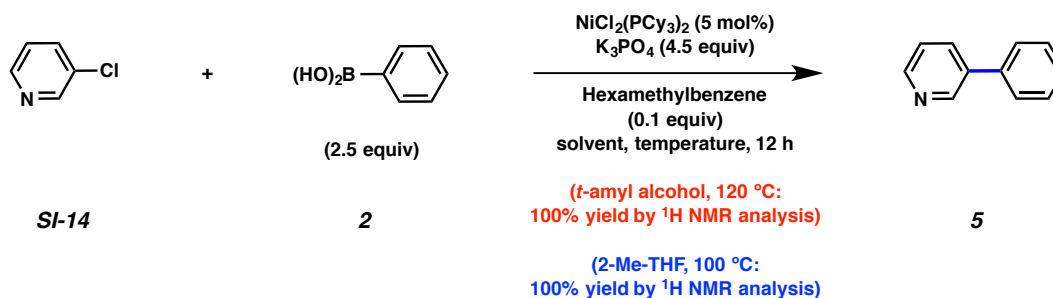

**5 (Figure 2).** The yield was determined by <sup>1</sup>H NMR analysis with hexamethylbenzene as an internal standard. Spectral data match those previously reported.<sup>3</sup>

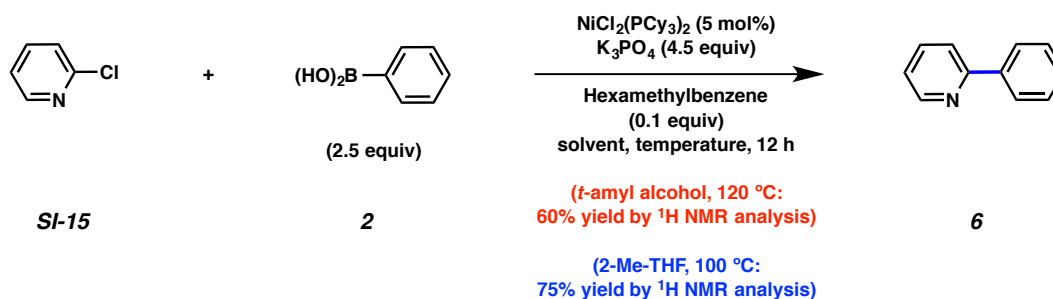

**6 (Figure 2).** The yield was determined by <sup>1</sup>H NMR analysis with hexamethylbenzene as an internal standard. Spectral data match those previously reported.<sup>4</sup>

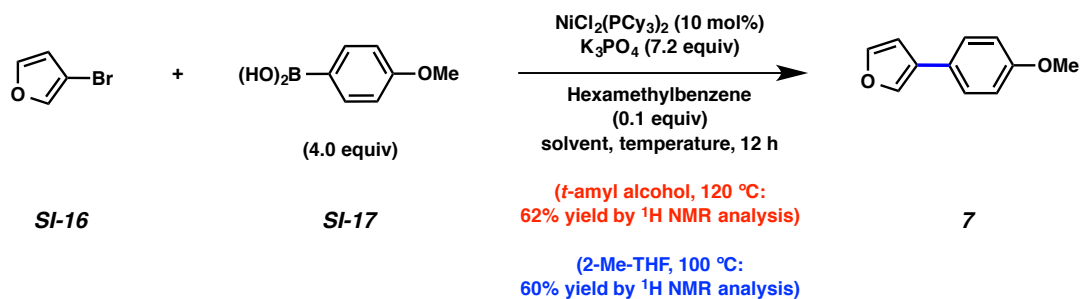

**7 (Figure 2).** The yield was determined by <sup>1</sup>H NMR analysis with hexamethylbenzene as an internal standard. Spectral data match those previously reported.<sup>5</sup>

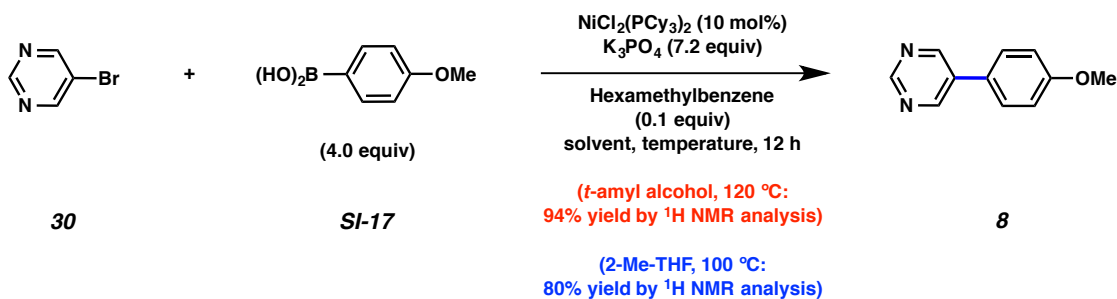

**8 (Figure 2).** The yield was determined by <sup>1</sup>H NMR analysis with hexamethylbenzene as an internal standard. Spectral data match those previously reported.<sup>5</sup>

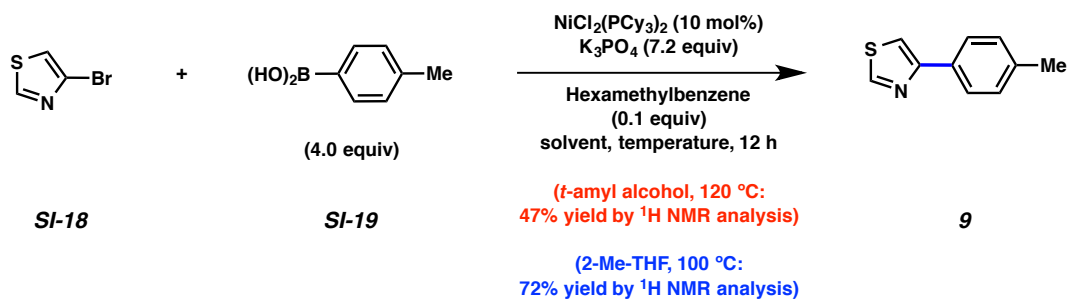

**9 (Figure 2).** The yield was determined by <sup>1</sup>H NMR analysis with hexamethylbenzene as an internal standard. Spectral data match those previously reported.<sup>6</sup>

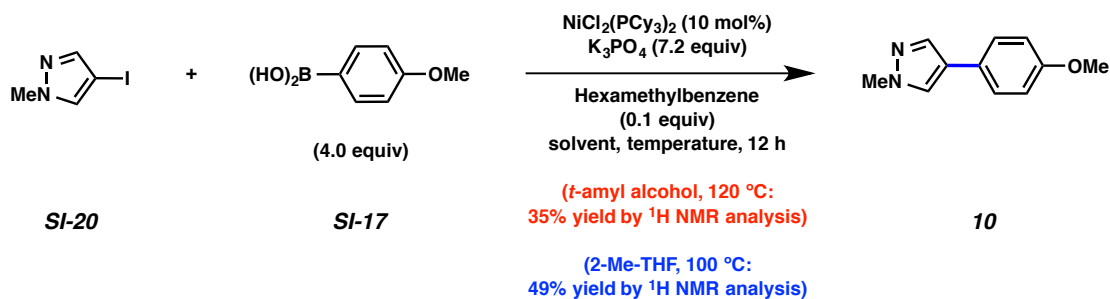

**10 (Figure 2).** The yield was determined by  $^1\text{H NMR}$  analysis with hexamethylbenzene as an internal standard. Spectral data match those previously reported.<sup>7</sup>

### E. Cross-coupling Reactions of Aryl Carbamates, Sulfamates, and Mesylates

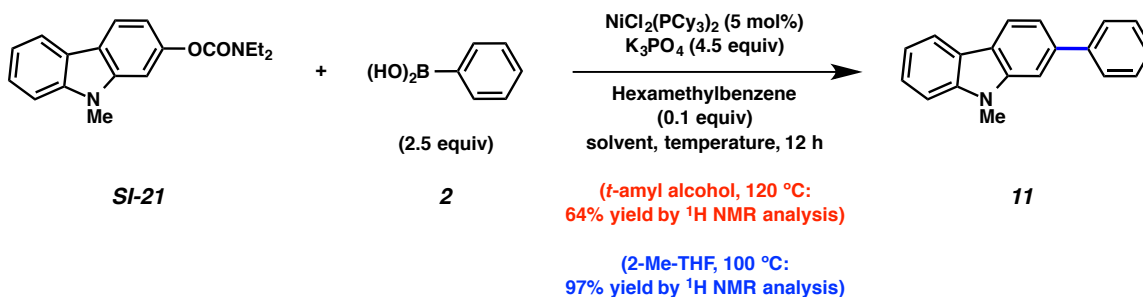

**Representative Procedure (coupling of SI-21 is used as an example). 11 (Figure 3).** A 1-dram vial was charged with anhydrous powdered  $\text{K}_3\text{PO}_4$  (429.8 mg, 2.03 mmol, 4.50 equiv) and a magnetic stir bar. The vial and contents were flame-dried under reduced pressure, then allowed to cool under  $\text{N}_2$ . Hexamethylbenzene (7.3 mg, 0.045 mmol, 0.10 equiv), boronic acid **2** (171.0 mg, 1.125 mmol, 2.50 equiv),  $\text{NiCl}_2(\text{PCy}_3)_2$  (15.5 mg, 0.023 mmol, 5 mol%), and substrate **SI-21** (104.9 mg, 0.45 mmol, 1.00 equiv) were added. The vial was then evacuated and backfilled with  $\text{N}_2$ . To the vial, solvent (1.5 mL) was added and then the vial was sealed with a Teflon-lined screw cap. The mixture was allowed to stir rapidly at 23 °C for 1 h, and then heated to 100 °C (2-Me-THF) or 120 °C (*t*-amyl alcohol) for 12 h. After cooling the reaction vessel to 23 °C, the reaction was transferred to a test tube containing 1 M aqueous HCl (4 mL). The layers were separated; the aqueous layer was extracted with EtOAc (3 x 2 mL). The combined organic layers were then washed with brine (2 mL), dried over  $\text{Na}_2\text{SO}_4$ , and passed through a  $\text{SiO}_2$  plug. The pad was washed with EtOAc (10 mL) and the organic layers were concentrated under

reduced pressure. The yield was determined by  $^1\text{H}$  NMR analysis with hexamethylbenzene as an internal standard. Spectral data match those previously reported.<sup>1a</sup>

*Any modifications of the conditions shown in this representative procedure are specified in the following schemes, which depict all of the results shown in Figure 3.*

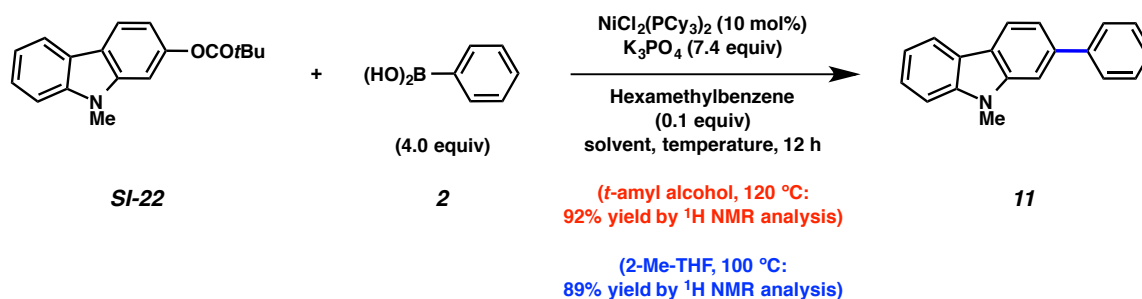

**11 (Figure 3).** The yield was determined by  $^1\text{H}$  NMR analysis with hexamethylbenzene as an internal standard. Spectral data match those previously reported.<sup>1a</sup>

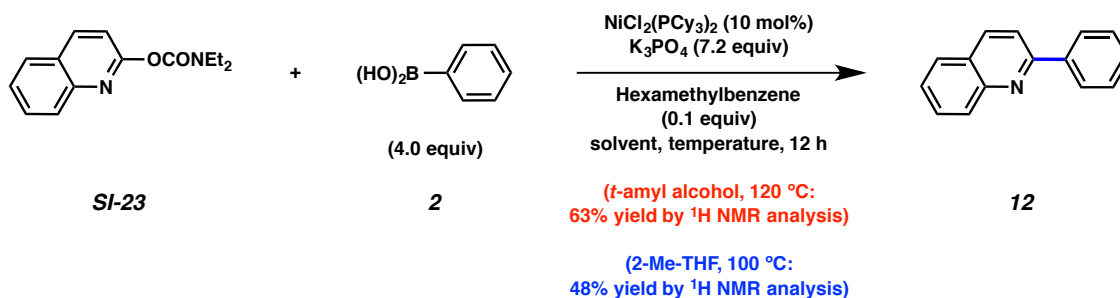

**12 (Figure 3).** The yield was determined by  $^1\text{H}$  NMR analysis with hexamethylbenzene as an internal standard. Spectral data match those previously reported.<sup>8</sup>



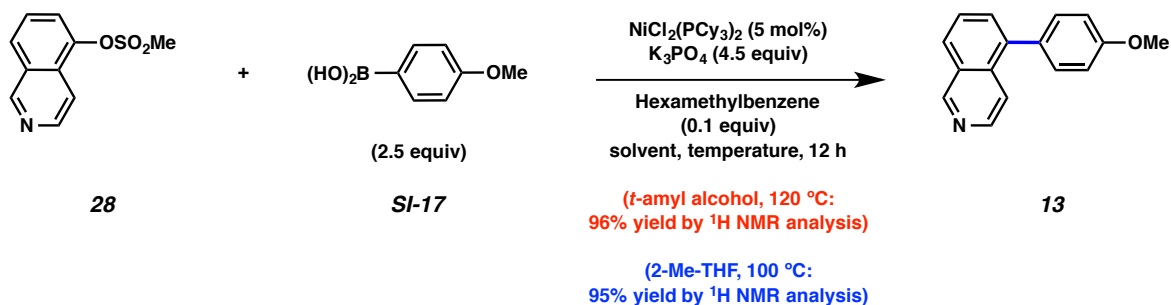

**13 (Figure 3).** The yield was determined by  $^1\text{H}$  NMR analysis with hexamethylbenzene as an internal standard. Spectral data match those previously reported.<sup>8</sup>

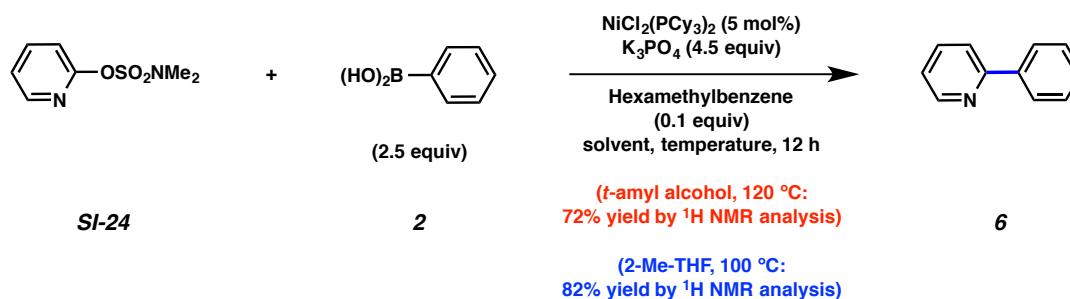

**6 (Figure 3).** The yield was determined by  $^1\text{H}$  NMR analysis with hexamethylbenzene as an internal standard. Spectral data match those previously reported.<sup>8</sup>

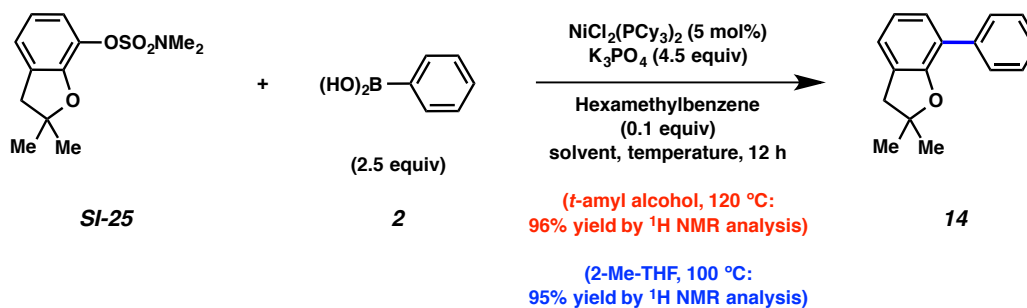

**14 (Figure 3).** The yield was determined by  $^1\text{H}$  NMR analysis with hexamethylbenzene as an internal standard. Spectral data match those previously reported.<sup>1e</sup>

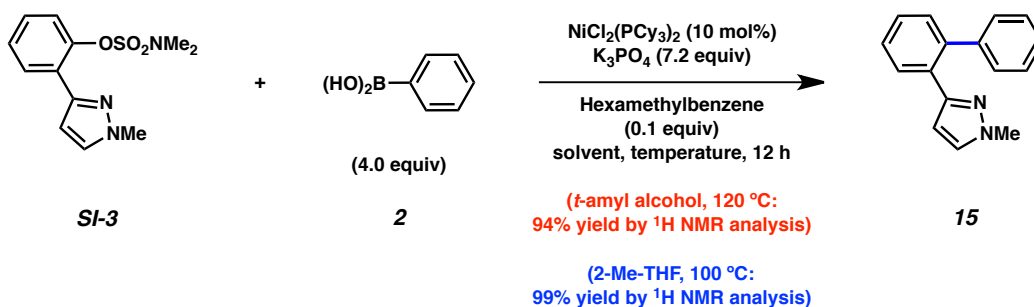

**15 (Figure 3).** The yield was determined by  $^1\text{H}$  NMR analysis with hexamethylbenzene as an internal standard.  $R_f$  0.24 (3:1 Hexanes:EtOAc);  $^1\text{H}$  NMR: (600 MHz,  $\text{CDCl}_3$ ):  $\delta$  7.82 (dd,  $J = 7.6, 1.4, 1\text{H}$ ), 7.41–7.35 (m, 2H), 7.33–7.26 (m, 6H), 7.08 (d,  $J = 2.1, 1\text{H}$ ), 5.45 (d,  $J = 2.1, 1\text{H}$ ), 3.89 (s, 3H);  $^{13}\text{C}$  NMR (125 MHz,  $\text{CDCl}_3$ ):  $\delta$  151.3, 142.2, 140.7, 132.5, 130.5, 130.1, 129.7, 129.3, 128.0, 127.7, 127.6, 126.8, 106.7, 39.0; IR (film): 3055, 2934, 1597, 1501, 1461, 1392, 1221, 751, 699  $\text{cm}^{-1}$ ; HRMS-ESI ( $m/z$ ) [ $\text{M}+\text{H}$ ] $^+$  calcd for  $\text{C}_{16}\text{H}_{14}\text{N}_2$ , 235.1235; found 235.1236.

## F. Heterocycle-Heterocycle Cross-Couplings of Aryl Halides

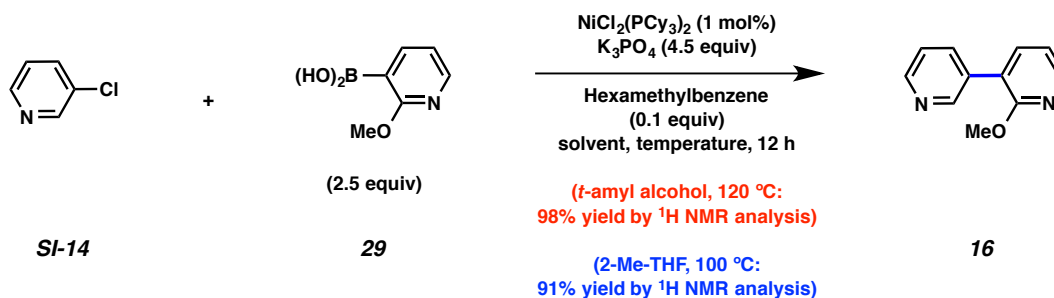

**Representative Procedure (coupling of SI-14 is used as an example). 16 (Figure 4).** A 1-dram vial was charged with anhydrous powdered  $\text{K}_3\text{PO}_4$  (859.7 mg, 4.1 mmol, 4.50 equiv) and a magnetic stir bar. The vial and contents were flame-dried under reduced pressure, then allowed to cool under  $\text{N}_2$ . Hexamethylbenzene (14.6 mg, 0.09 mmol, 0.10 equiv), boronic acid **29** (344.1 mg, 2.25 mmol, 2.5 equiv),  $\text{NiCl}_2(\text{PCy}_3)_2$  (6.2 mg, 0.009 mmol, 1 mol%), and substrate **SI-14** (102.2 mg, 0.9 mmol, 1.00 equiv) were added. The vial was then evacuated and backfilled with  $\text{N}_2$ . To the vial, solvent (1.5 mL) was added and then the vial was sealed with a Teflon-lined screw cap. The mixture was allowed to stir rapidly at 23 °C for 1 h, and then heated to 100 °C (2-Me-THF) or 120 °C (*t*-amyl alcohol) for 12 h. The reaction vessel was cooled to 23 °C and then

transferred to a test tube containing 1 M aqueous HCl (2 mL). The layers were separated; the aqueous layer was extracted with EtOAc (3 x 2 mL). The combined organic layers were then washed with brine (2 mL), dried over MgSO<sub>4</sub>, and passed through a SiO<sub>2</sub> plug. The pad was washed with EtOAc (10 mL) and the organic layers were concentrated under reduced pressure. The yield was determined by <sup>1</sup>H NMR analysis with hexamethylbenzene as an internal standard. Spectral data match those previously reported.<sup>9</sup>

*Any modifications of the conditions shown in this representative procedure are specified in the following schemes, which depict all of the results shown in Figure 4.*

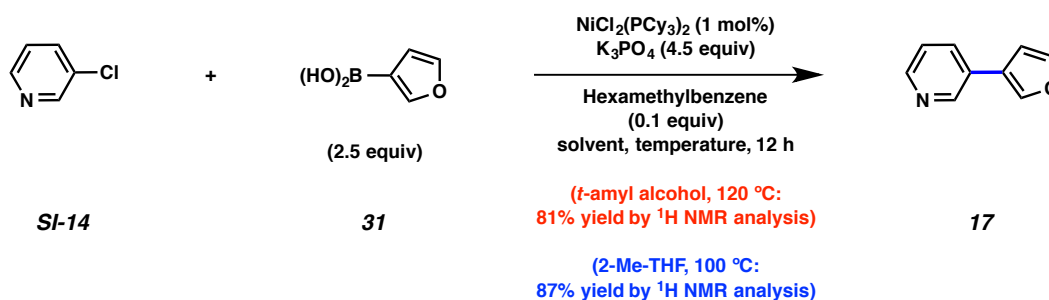

**17 (Figure 4).** The yield was determined by <sup>1</sup>H NMR analysis with hexamethylbenzene as an internal standard. Spectral data match those previously reported.<sup>10</sup>

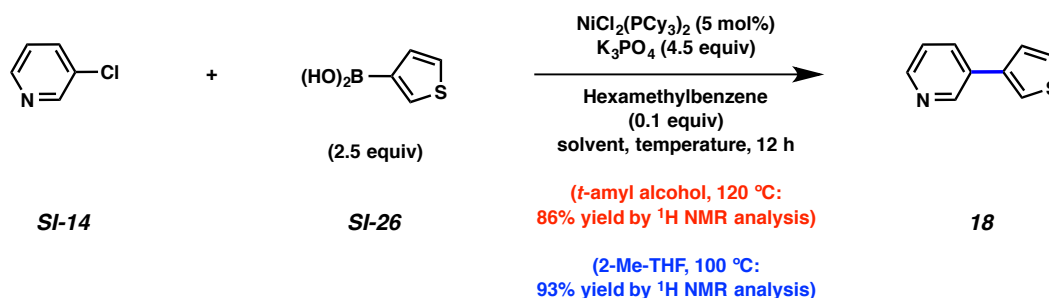

**18 (Figure 4).** The yield was determined by <sup>1</sup>H NMR analysis with hexamethylbenzene as an internal standard. Spectral data match those previously reported.<sup>1f</sup>

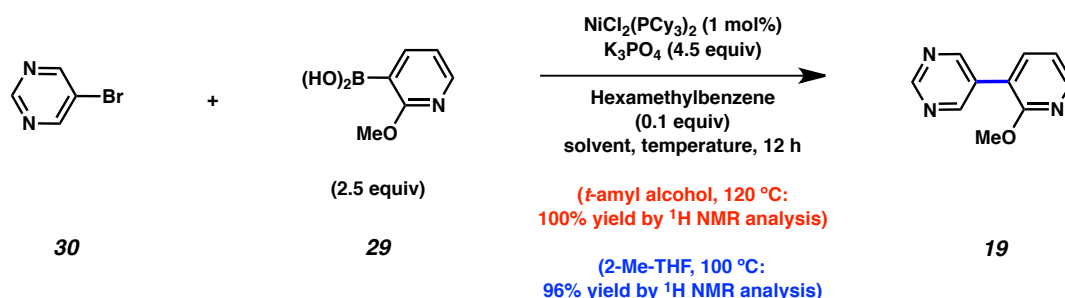

**19 (Figure 4).** The yield was determined by  $^1\text{H}$  NMR analysis with hexamethylbenzene as an internal standard.  $R_f$  0.24 (1:1 Hexanes:EtOAc);  $^1\text{H}$  NMR: (500 MHz,  $\text{CDCl}_3$ ):  $\delta$  9.15 (s, 1H), 8.92 (s, 2H), 8.23 (dd,  $J = 4.9, 1.8, 1\text{H}$ ), 7.63 (dd,  $J = 7.3, 1.8, 1\text{H}$ ), 7.02 (dd,  $J = 7.3, 4.9, 1\text{H}$ ), 3.97 (s, 3H);  $^{13}\text{C}$  NMR (125 MHz,  $\text{CDCl}_3$ ):  $\delta$  160.8, 157.4, 156.5, 147.7, 138.2, 130.6, 117.6, 117.3, 53.7; IR (film): 3020, 2956, 1578, 1551, 1460, 1395, 1015, 798, 726  $\text{cm}^{-1}$ ; HRMS-ESI ( $m/z$ )  $[\text{M}+\text{H}]^+$  calcd for  $\text{C}_{10}\text{H}_9\text{N}_3\text{O}$ , 188.0824; found 188.0831.

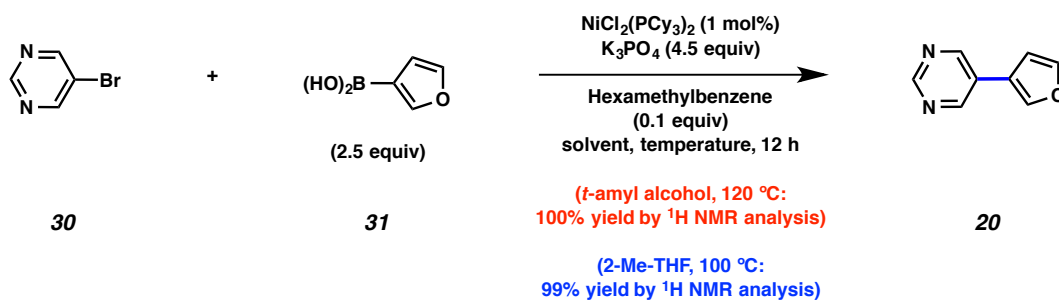

**20 (Figure 4).** The yield was determined by  $^1\text{H}$  NMR analysis with hexamethylbenzene as an internal standard. Spectral data match those previously reported.<sup>11</sup>

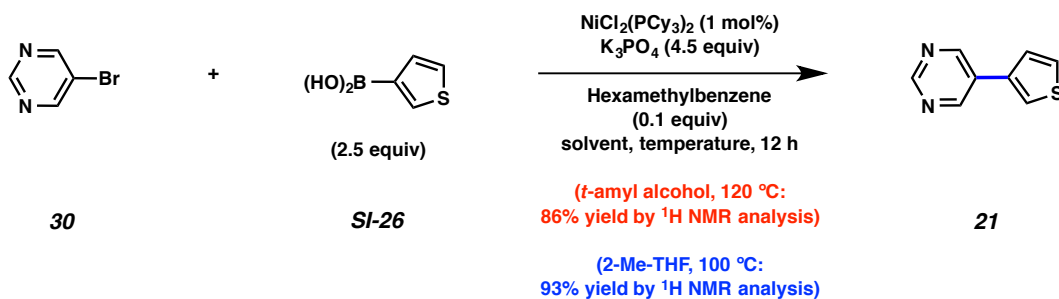

**21 (Figure 4).** The yield was determined by  $^1\text{H}$  NMR analysis with hexamethylbenzene as an internal standard. Spectral data match those previously reported.<sup>12</sup>

## G. Heterocycle-Heterocycle Cross-Couplings of Aryl Carbamates, Sulfamates, and Mesylates

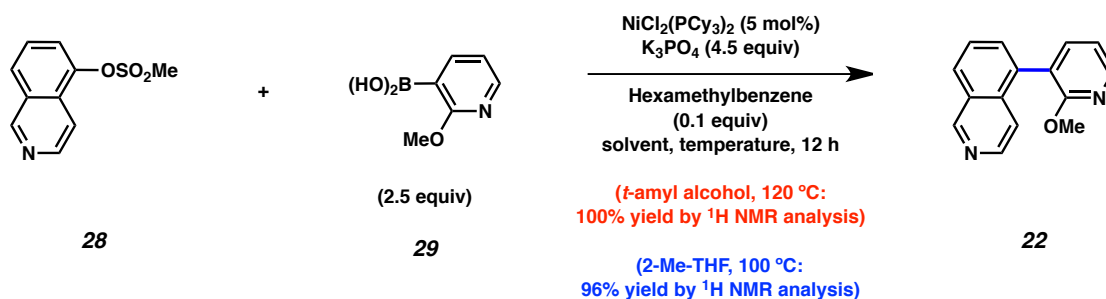

**Representative Procedure (coupling of 28 is used as an example). 22 (Figure 4).** A 1-dram vial was charged with anhydrous powdered  $\text{K}_3\text{PO}_4$  (429.9 mg, 2.03 mmol, 4.50 equiv) and a magnetic stir bar. The vial and contents were flame-dried under reduced pressure, then allowed to cool under  $\text{N}_2$ . Hexamethylbenzene (7.3 mg, 0.045 mmol, 0.10 equiv), boronic acid **29** (125.9 mg, 1.125 mmol, 2.50 equiv),  $\text{NiCl}_2(\text{PCy}_3)_2$  (15.5 mg, 0.023 mmol, 5 mol%), and substrate **28** (104.9 mg, 0.45 mmol, 1.00 equiv) were added. The vial was then evacuated and backfilled with  $\text{N}_2$ . To the vial, solvent (1.5 mL) was added and then the vial was sealed with a Teflon-lined screw cap. The mixture was allowed to stir rapidly at 23 °C for 1 h, and then heated to 100 °C (2-Me-THF) or 120 °C (*t*-amyl alcohol) for 12 h. The reaction vessel was cooled to 23 °C and then transferred to a test tube containing 1 M aqueous HCl (4 mL). The layers were separated; the aqueous layer was extracted with EtOAc (3 x 2 mL). The combined organic layers were then washed with brine (2 mL), dried over  $\text{Na}_2\text{SO}_4$ , and passed through a  $\text{SiO}_2$  plug. The pad was washed with EtOAc (10 mL) and the organic layers were concentrated under reduced pressure. The yield was determined by  $^1\text{H}$  NMR analysis with hexamethylbenzene as an internal standard.  $R_f$  0.40 (1:1 Hexanes:Acetone);  $^1\text{H}$  NMR: (600 MHz,  $\text{CDCl}_3$ ):  $\delta$  9.30 (d,  $J = 0.9$ , 1H), 8.46 (d,  $J = 6.0$ , 1H), 8.31 (dd,  $J = 5.0$ , 1.9, 1H), 8.01 (dt,  $J = 8.0$ , 0.9, 1H), 7.67 (dd,  $J = 7.0$ , 0.9, 1H), 7.63 (dd,  $J = 7.0$ , 1.3, 1H), 7.58 (dd,  $J = 7.2$ , 1.9, 1H), 7.35 (dt,  $J = 5.9$ , 0.9, 1H), 7.05 (dd,  $J = 7.2$ , 5.0, 1H), 3.87 (s, 3H);  $^{13}\text{C}$  NMR (125 MHz,  $\text{CDCl}_3$ ): 161.5, 153.0, 147.0, 143.3, 140.2, 134.5, 134.2, 131.7, 128.8, 127.8, 126.9, 122.0, 118.6, 116.9, 53.6; IR (film): 3404, 2931, 1618, 1574, 1459, 1400, 1015, 776  $\text{cm}^{-1}$ ; HRMS-ESI ( $m/z$ )  $[\text{M}+\text{H}]^+$  calcd for  $\text{HC}_{15}\text{H}_{12}\text{N}_2\text{O}$ , 237.1025; found 237.1028.

Any modifications of the conditions shown in this representative procedure are specified in the following schemes, which depict all of the results shown in Figure 4.

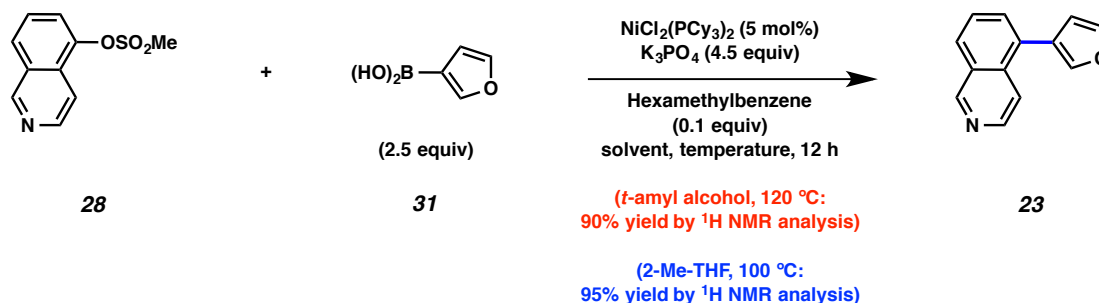

**23 (Figure 4).** The yield was determined by  $^1\text{H}$  NMR analysis with hexamethylbenzene as an internal standard. Spectral data match those previously reported.<sup>10</sup>

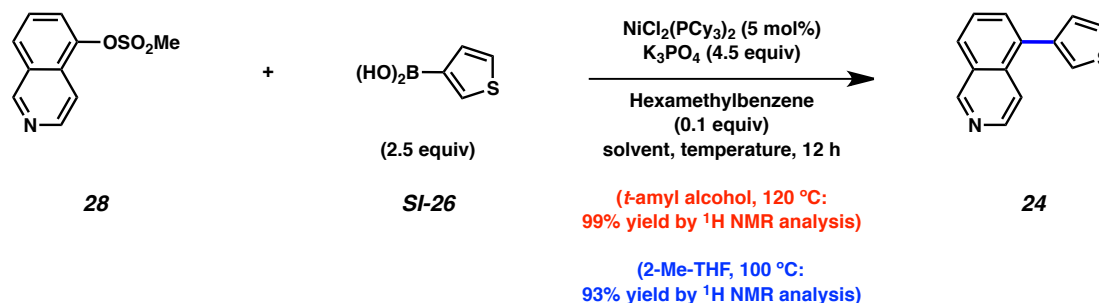

**24 (Figure 4).** The yield was determined by  $^1\text{H}$  NMR analysis with hexamethylbenzene as an internal standard.  $R_f$  0.43(1:1 Hexanes:EtOAc);  $^1\text{H}$  NMR: (600 MHz,  $\text{CDCl}_3$ ):  $\delta$  9.29 (s, 1H), 8.51 (d,  $J = 6.0$ , 1H), 7.96 (d,  $J = 8.2$ , 1H), 7.85 (d,  $J = 6.0$ , 1H), 7.71 (dd,  $J = 7.2$ , 1.2, 1H), 7.63 (t,  $J = 7.2$ , 1H), 7.50 (dd,  $J = 4.9$ , 3.0, 1H), 7.42 (dd,  $J = 3.0$ , 1.2, 1H), 7.30 (dd,  $J = 4.9$ , 1.2, 1H);  $^{13}\text{C}$  NMR (150 MHz,  $\text{CDCl}_3$ ):  $\delta$  151.9, 148.6, 142.5, 138.6, 133.4, 133.1, 129.9, 128.2, 128.1, 126.3, 125.9, 125.1, 123.0, 117.5; IR (film): 3072, 1938, 1721, 1615, 1585, 1370, 829, 787, 663  $\text{cm}^{-1}$ ; HRMS-ESI ( $m/z$ )  $[\text{M}+\text{H}]^+$  calcd for  $\text{C}_{13}\text{H}_9\text{NS}$ , 212.0534; found 212.0530.

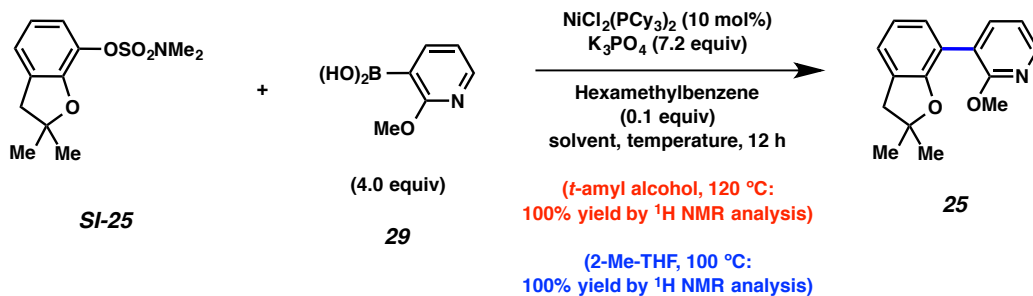

**25 (Figure 4).** The yield was determined by <sup>1</sup>H NMR analysis with hexamethylbenzene as an internal standard. *R<sub>f</sub>* 0.59 (3:1 Hexanes:EtOAc); <sup>1</sup>H NMR: (400 MHz, CDCl<sub>3</sub>): δ 8.13 (dd, *J* = 4.9, 1.9, 1H), 7.70 (dd, *J* = 7.4, 1.9, 1H), 7.23 (d, *J* = 7.7, 1H), 7.12 (d, *J* = 7.2, 1H), 6.94 (dd, *J* = 7.2, 4.9, 1H), 6.87 (t, *J* = 7.4, 1H), 3.95 (s, 3H), 3.05 (s, 2H), 1.46 (s, 6H); <sup>13</sup>C NMR (125 MHz, CDCl<sub>3</sub>): δ 161.2, 156.7, 145.7, 145.6, 139.5, 129.4, 127.7, 124.7, 120.9, 119.7, 118.8, 116.7, 86.6, 53.5, 43.1, 28.3; IR (film): 2927, 1577, 1439, 1397, 1297, 1257 cm<sup>-1</sup>; HRMS-ESI (*m/z*) [M+H]<sup>+</sup> calcd for C<sub>16</sub>H<sub>17</sub>NO<sub>2</sub>, 256.1338; found 256.1335.

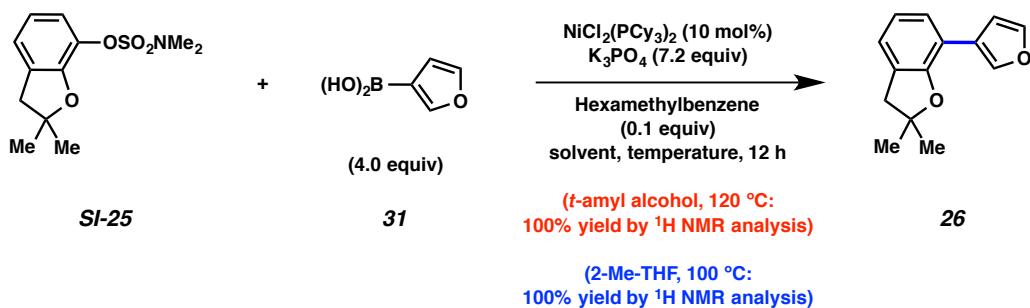

**26 (Figure 4).** The yield was determined by <sup>1</sup>H NMR analysis with hexamethylbenzene as an internal standard. *R<sub>f</sub>* 0.38 (4:1 Hexanes:Benzene); <sup>1</sup>H NMR: (600 MHz, CDCl<sub>3</sub>): δ 8.06 (s, 1H), 7.46 (t, *J* = 1.5, 1H), 7.30 (d, *J* = 7.5, 1H), 7.04 (dd, *J* = 7.2, 0.8, 1H), 6.86 (t, *J* = 7.5, 1H), 6.83 (d, *J* = 1.3, 1H), 3.06 (s, 2H), 1.53 (s, 6H); <sup>13</sup>C NMR (125 MHz, CDCl<sub>3</sub>): 155.8, 142.7, 141.3, 127.6, 125.1, 123.3, 121.7, 120.2, 114.9, 108.5, 86.9, 42.9, 28.6; IR (film): 2972, 1599, 1510, 1449, 1295, 1246, 1160, 1024 cm<sup>-1</sup>; HRMS-ESI (*m/z*) [M+H]<sup>+</sup> calcd for C<sub>14</sub>H<sub>14</sub>O<sub>2</sub>, 215.1072; found 215.1065.

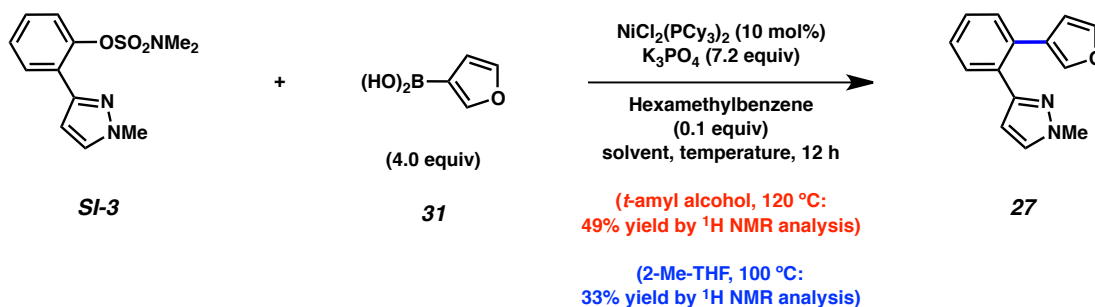

**27 (Figure 4).** The yield was determined by  $^1\text{H}$  NMR analysis with hexamethylbenzene as an internal standard.  $R_f$  0.54 (1:1 Hexanes:EtOAc);  $^1\text{H}$  NMR: (600 MHz,  $\text{CDCl}_3$ ):  $\delta$  7.64–7.62 (m, 1H), 7.39–7.37 (m, 1H), 7.35–7.33 (m, 4H), 7.26–7.25 (m, 1H), 6.28 (d,  $J = 0.9$ , 1H), 5.99 (d,  $J = 2.2$ , 1H), 3.93 (s, 3H);  $^{13}\text{C}$  NMR (125 MHz,  $\text{CDCl}_3$ ):  $\delta$  151.5, 142.2, 140.1, 133.0, 131.6, 130.3, 130.1, 129.9, 127.9, 127.4, 125.9, 111.9, 106.6, 39.0; IR (film): 2930, 1460, 1368, 1161, 850, 742  $\text{cm}^{-1}$ .

## H. Isolation Experiments

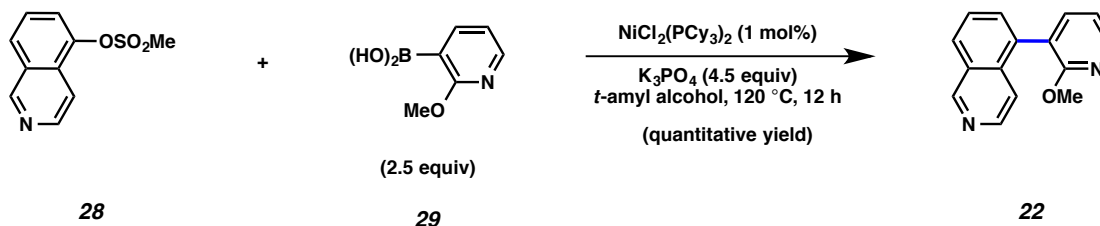

A 100 mL round bottom flask was charged with anhydrous powdered  $\text{K}_3\text{PO}_4$  (4.28 g, 20.16 mmol, 4.50 equiv) and a magnetic stir bar. The flask and contents were flame-dried under reduced pressure, then allowed to cool under  $\text{N}_2$ . Boronic acid **29** (1.71 g, 11.20 mmol, 2.50 equiv),  $\text{NiCl}_2(\text{PCy}_3)_2$  (31.1 mg, 0.045 mmol, 1 mol%), and isoquinoline **28** (1.00 g, 4.48 mmol, 1.00 equiv) were added. The flask was then evacuated and backfilled with  $\text{N}_2$ . *Tert*-amyl alcohol (14.93 mL) was added and the flask was equipped with a water-cooled condenser. The heterogeneous mixture was allowed to stir at 23 °C for 1 h, then heated to 120 °C for 12 h. The reaction vessel was cooled to 23 °C and then transferred to a round bottom flask containing  $\text{CH}_2\text{Cl}_2$  (45 mL), EtOAc (15 mL), and MeOH (3 mL). Silica gel (24 mL) was added and the solvent was removed under reduced pressure to afford a free-flowing powder. This powder was



then dry-loaded onto a silica gel column (7 cm x 15 cm) and purified by flash chromatography (6:1 Hexanes:Acetone) to yield hetero-biaryl product **22** (1.06 g, 100% yield) as a white solid.  $R_f$  0.40 (1:1 Hexanes:Acetone);  $^1\text{H NMR}$ : (600 MHz,  $\text{CDCl}_3$ ):  $\delta$  9.30 (d,  $J = 0.9$ , 1H), 8.46 (d,  $J = 6.0$ , 1H), 8.31 (dd,  $J = 5.0, 1.9$ , 1H), 8.01 (dt,  $J = 8.0, 0.9$ , 1H), 7.67 (dd,  $J = 7.0, 0.9$ , 1H), 7.63 (dd,  $J = 7.0, 1.3$ , 1H), 7.58 (dd,  $J = 7.2, 1.9$ , 1H), 7.35 (dt,  $J = 5.9, 0.9$ , 1H), 7.05 (dd,  $J = 7.2, 5.0$ , 1H), 3.87 (s, 3H);  $^{13}\text{C NMR}$  (125 MHz,  $\text{CDCl}_3$ ): 161.5, 153.0, 147.0, 143.3, 140.2, 134.5, 134.2, 131.7, 128.8, 127.8, 126.9, 122.0, 118.6, 116.9, 53.6; IR (film): 3404, 2931, 1618, 1574, 1459, 1400, 1015, 776  $\text{cm}^{-1}$ ; HRMS-ESI ( $m/z$ )  $[\text{M}+\text{H}]^+$  calcd for  $\text{HC}_{15}\text{H}_{12}\text{N}_2\text{O}$ , 237.1025; found 237.1028.

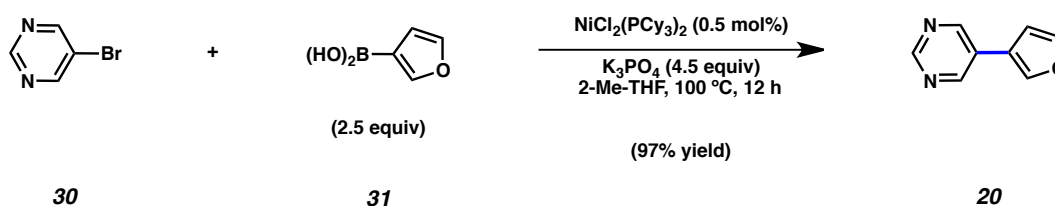

A 250 mL round-bottom flask was charged with anhydrous powdered  $\text{K}_3\text{PO}_4$  (30.04 g, 141.53 mmol, 4.50 equiv) and a magnetic stir bar. The flask and contents were flame-dried under reduced pressure, then allowed to cool under  $\text{N}_2$ . Boronic acid **31** (8.80 g, 78.63 mmol, 2.50 equiv),  $\text{NiCl}_2(\text{PCy}_3)_2$  (110.47 mg, 0.16 mmol, 0.5 mol%), and pyrimidine **30** (5.00 g, 31.45 mmol, 1.00 equiv) were added. The flask was then evacuated and backfilled with  $\text{N}_2$ . 2-Me-THF (104.83 mL) was added and the flask was equipped with a water-cooled condenser. The heterogeneous mixture was allowed to stir at 23  $^\circ\text{C}$  for 1 h, then heated to 100  $^\circ\text{C}$  for 12 h. The reaction vessel was cooled to 23  $^\circ\text{C}$  and was quenched with 1 M HCl (20 mL). The layers were separated; the aqueous layer was extracted with EtOAc (3 x 100 mL). The combined organic layers were then washed with brine (50 mL), dried over  $\text{MgSO}_4$ , and concentrated under reduced pressure. The crude residue was purified by flash chromatography (3:1 Hexanes:EtOAc) to yield bis(heterocyclic) compound **20** as a yellow solid (4.46 g, 97% yield).  $R_f$  0.25 (3:1 Hexanes:EtOAc). Spectral data match those previously reported.<sup>11</sup>

## I. Cross-coupling Reactions Utilizing Microwave Heating

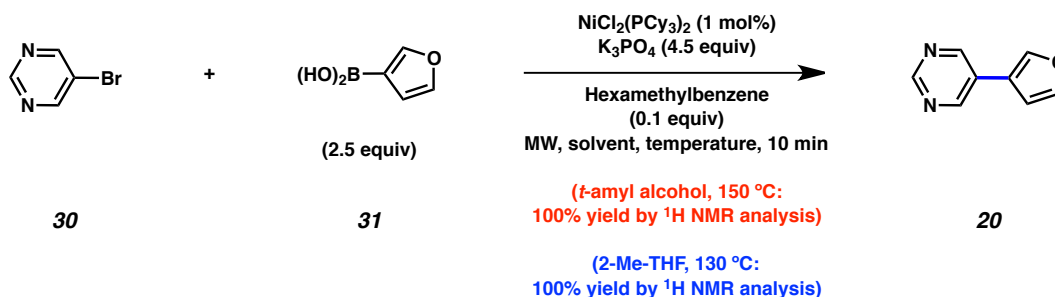

A 10 mL microwave vial was charged with anhydrous powdered  $\text{K}_3\text{PO}_4$  (620.9 mg, 2.93 mmol, 4.50 equiv) and a magnetic stir bar. The vial and contents were flame-dried under reduced pressure, then allowed to cool under  $\text{N}_2$ . Boronic acid **31** (181.8 mg, 1.63 mmol, 2.50 equiv),  $\text{NiCl}_2(\text{PCy}_3)_2$  (4.5 mg, 0.033 mmol, 1 mol%), and pyrimidine **30** (103.3 mg, 0.65 mmol, 1.00 equiv) were added. The flask was then evacuated and backfilled with  $\text{N}_2$ . The solvent (2.2 mL) was added and the heterogeneous mixture was subsequently placed in the (CEM Discover) microwave cavity and irradiated at the temperature indicated for 10 min (hold time). The reaction vessel was cooled to 23 °C and was quenched with 1 M HCl (2 mL). The layers were separated; the aqueous layer was extracted with EtOAc (3 x 2 mL). The combined organic layers were then washed with brine (2 mL), dried over  $\text{MgSO}_4$ , and passed through a  $\text{SiO}_2$  plug. The pad was washed with EtOAc (10 mL) and the organic layers were concentrated under reduced pressure. The yield was determined by  $^1\text{H}$  NMR analysis with hexamethylbenzene as an internal standard.  $R_f$  0.25 (3:1 Hexanes:EtOAc). Spectral data match those previously reported.<sup>12</sup>

<sup>1</sup> (a) Quasdorf, K. W.; Tian, X.; Garg, N. K. *J. Am. Chem. Soc.* **2008**, *130*, 14422–14423. (b) Mesganaw, T.; Fine Nathel, N. F.; Garg, N. K. *Org. Lett.* **2012**, *14*, 2918–2921. (c) Antoft-Finch, A.; Blackburn, T.; Snickus, V. *J. Am. Chem. Soc.* **2009**, *131*, 17750–17752. (d) Mesganaw, T.; Silberstein, A. L.; Ramgren, S. D.; Fine Nathel, N. F.; Hong, X.; Liu, P.; Garg, N. K. *Chem. Sci.* **2011**, *2*, 1766–1771. (e) Quasdorf, K. W.; Antoft-Finch, A.; Liu, P.; Silberstein, A. L.; Komaromi, A.; Blackburn, T.; Ramgren, S. D.; Houk, K. N.; Snieckus, V.; Garg, N. K. *J. Am. Chem. Soc.* **2011**, *133*, 6352–6363. (f) Leowanawat, P.; Zhang, N.; Resmerita, A.-M.; Rosen, B. M.; Percec, V. *J. Org. Chem.* **2011**, *76*, 9946–9955. (g) Silberstein, A. L.; Ramgren, S. D.; Garg, N. K. *Org. Lett.* **2012**, *14*, 3796–3799.

<sup>2</sup> Catalan, J.; Fabero, F.; Claramunt, R. M.; Santa Maria, M. D.; Foces-Foces, M. C.; Cano, F. H.; Martinez-Ripoll, M.; Elguero, J.; Sastre, R. *J. Am. Chem. Soc.* **1992**, *114*, 5039–5048.

<sup>3</sup> Lerebours, R.; Wolf, C. *Org. Lett.* **2004**, *6*, 1147–1150.

<sup>4</sup> Yannan, C.; Gu, X.; Li, P. *Org. Lett.* **2013**, *15*, 2664–2667.

<sup>5</sup> Trice, S. L.; Kennedy, S. M.; Molander, G. A. *J. Org. Chem.* **2012**, *77*, 8678–8688.

<sup>6</sup> Adam, W.; Hartung, J.; Okamoto, H.; Marquardt, S.; Nau, W. M.; Pischel, U.; Saha-Moeller, C. R.; Spehar, K. *J. Org. Chem.* **2002**, *67*, 6041–6049.

<sup>7</sup> Beladhria, A.; Beydoun, K.; Ben Ammar, H.; Ben Sallem, R.; Doucet, H. *Synthesis* **2011**, *16*, 2553–2560.

<sup>8</sup> Mahdi, T.; del Castillo, J. N.; Stephan, D. W. *Organometallics* **2013**, *32*, 1971–1978.

<sup>9</sup> Pena, M. A.; Sestelo, J. P.; Sarandeses, L. A. *J. Org. Chem.* **2007**, *72*, 1271–1275.

<sup>10</sup> Beaumard, F.; Molander, G. A. *Org. Lett.* **2010**, *12*, 4022–4025.

<sup>11</sup> Biolatto, B.; Molander, G. A. *J. Org. Chem.* **2003**, *68*, 4302–4314.

<sup>12</sup> Oberli, M. A.; Buchwald, S. L. *Org. Lett.* **2012**, *14*, 4606–4609.

# <sup>1</sup>H NMR Spectra

LH-2-239-2.1

7.931  
7.903  
7.888  
7.860  
7.863  
7.539  
7.515  
7.502  
7.481  
7.476  
7.465  
7.452  
7.438  
7.430  
7.415  
7.410  
7.260

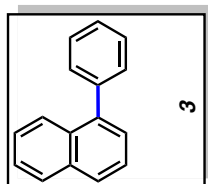

Current Data Parameters  
 NAME LH-2-239-2  
 EXPNO 1  
 PROCNO 1

F2 - Acquisition Parameters  
 Date\_ 20121101  
 Time 18.58  
 INSTRUM av300  
 PROBHD 5 mm PABBO BB-  
 PULPROG zg30  
 TD 65536  
 SOLVENT CDCl3  
 NS 15  
 DS 0  
 SWH 5995.204 Hz  
 FIDRES 0.091480 Hz  
 AQ 5.4657526 sec  
 RG 574.7  
 DW 83.400 usec  
 DE 6.00 usec  
 TE 297.7 K  
 D1 2.00000000 sec  
 TD0 1

===== CHANNEL f1 =====  
 NUC1 1H  
 P1 12.00 usec  
 PL1 -2.00 dB  
 PL1W 14.76977634 W  
 SFO1 300.1318008 MHz

F2 - Processing parameters  
 SI 65536  
 SF 300.1300119 MHz  
 WDW EM  
 SSB 0  
 LB 0.30 Hz  
 GB 0  
 PC 1.00

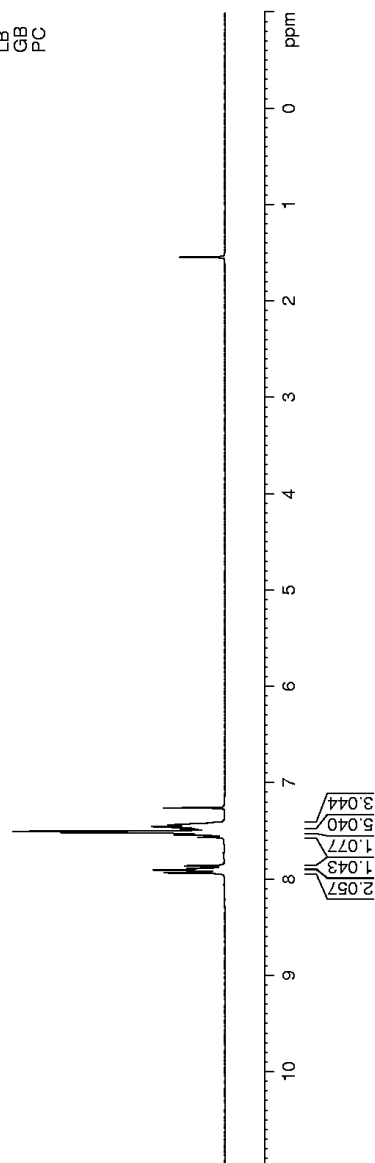

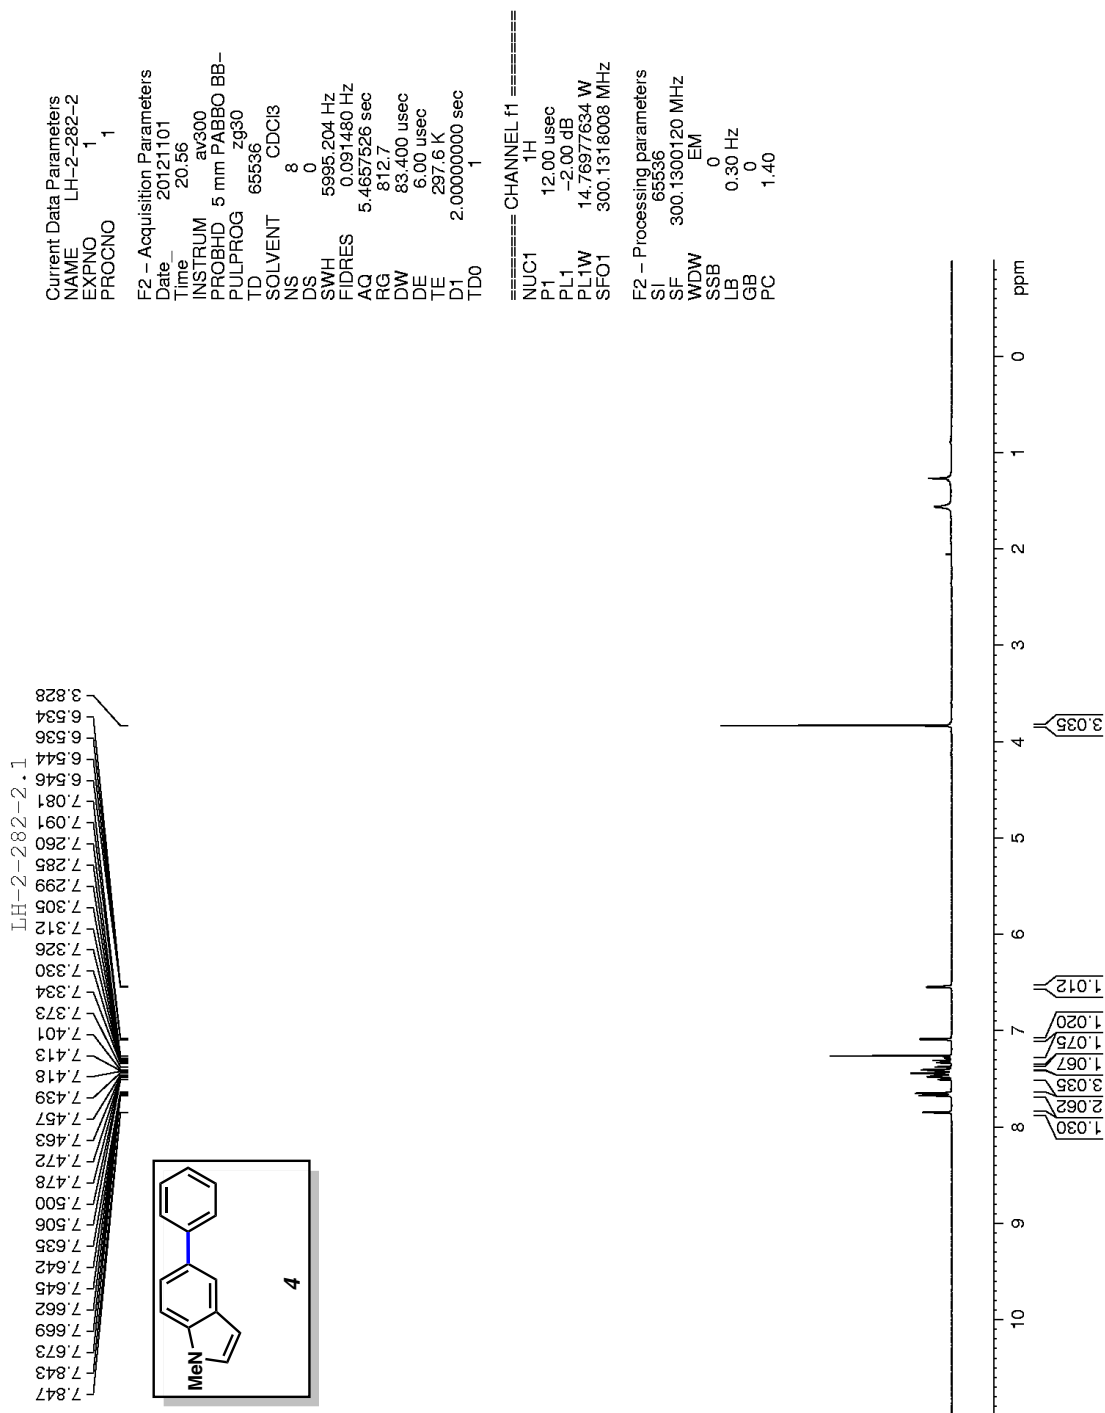

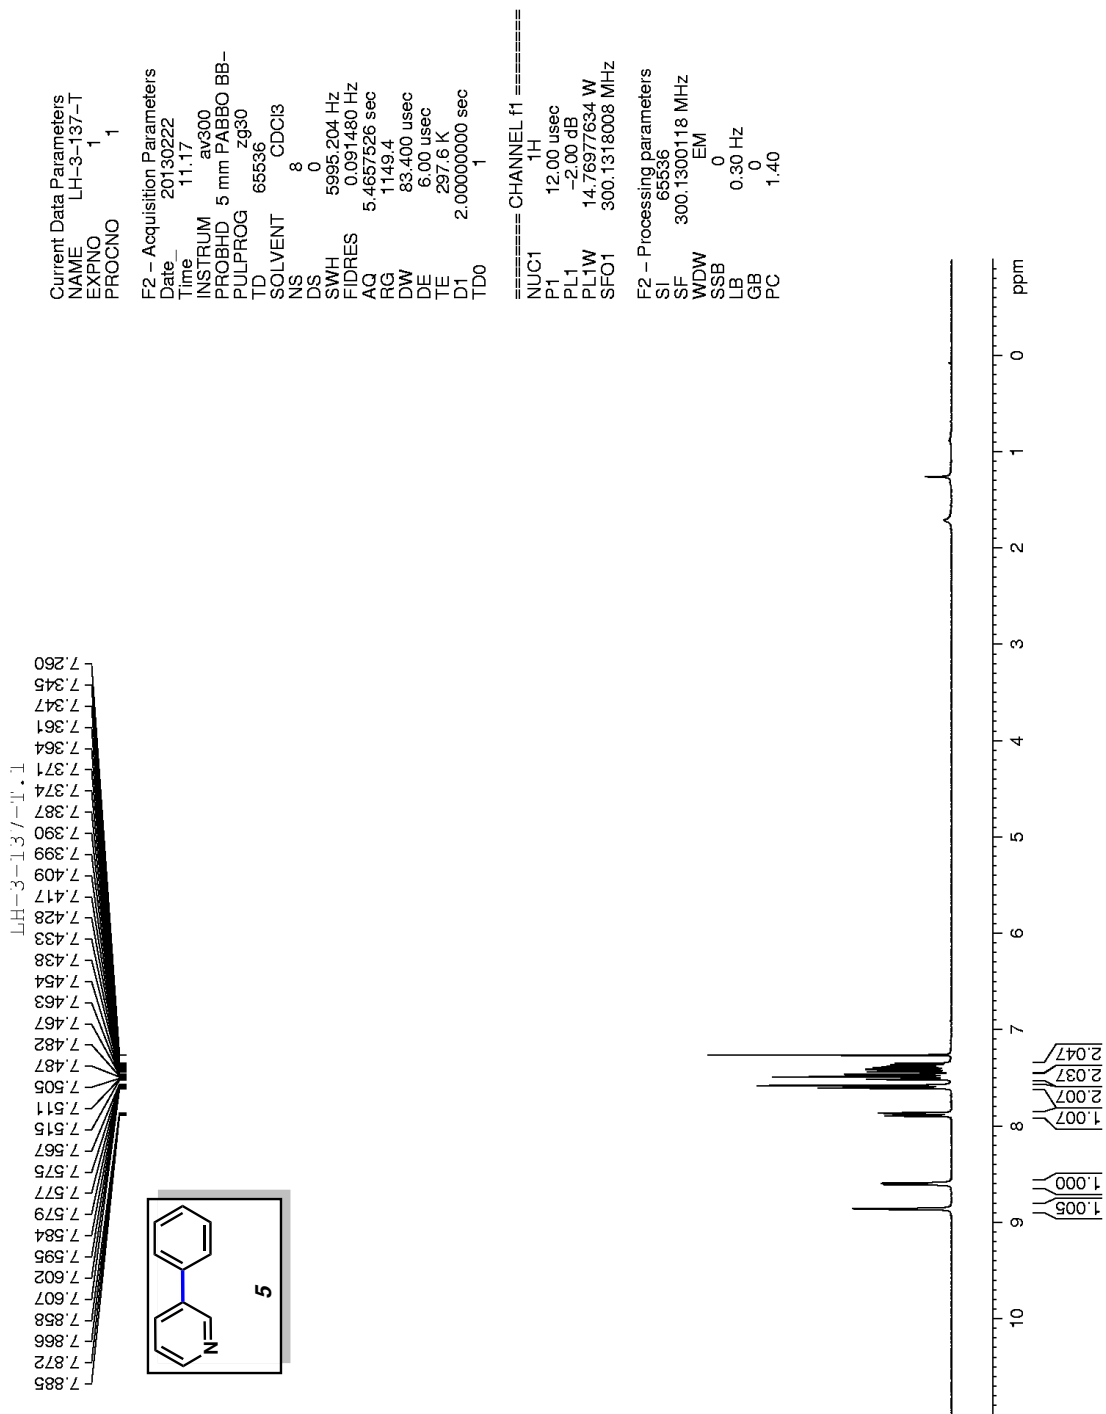

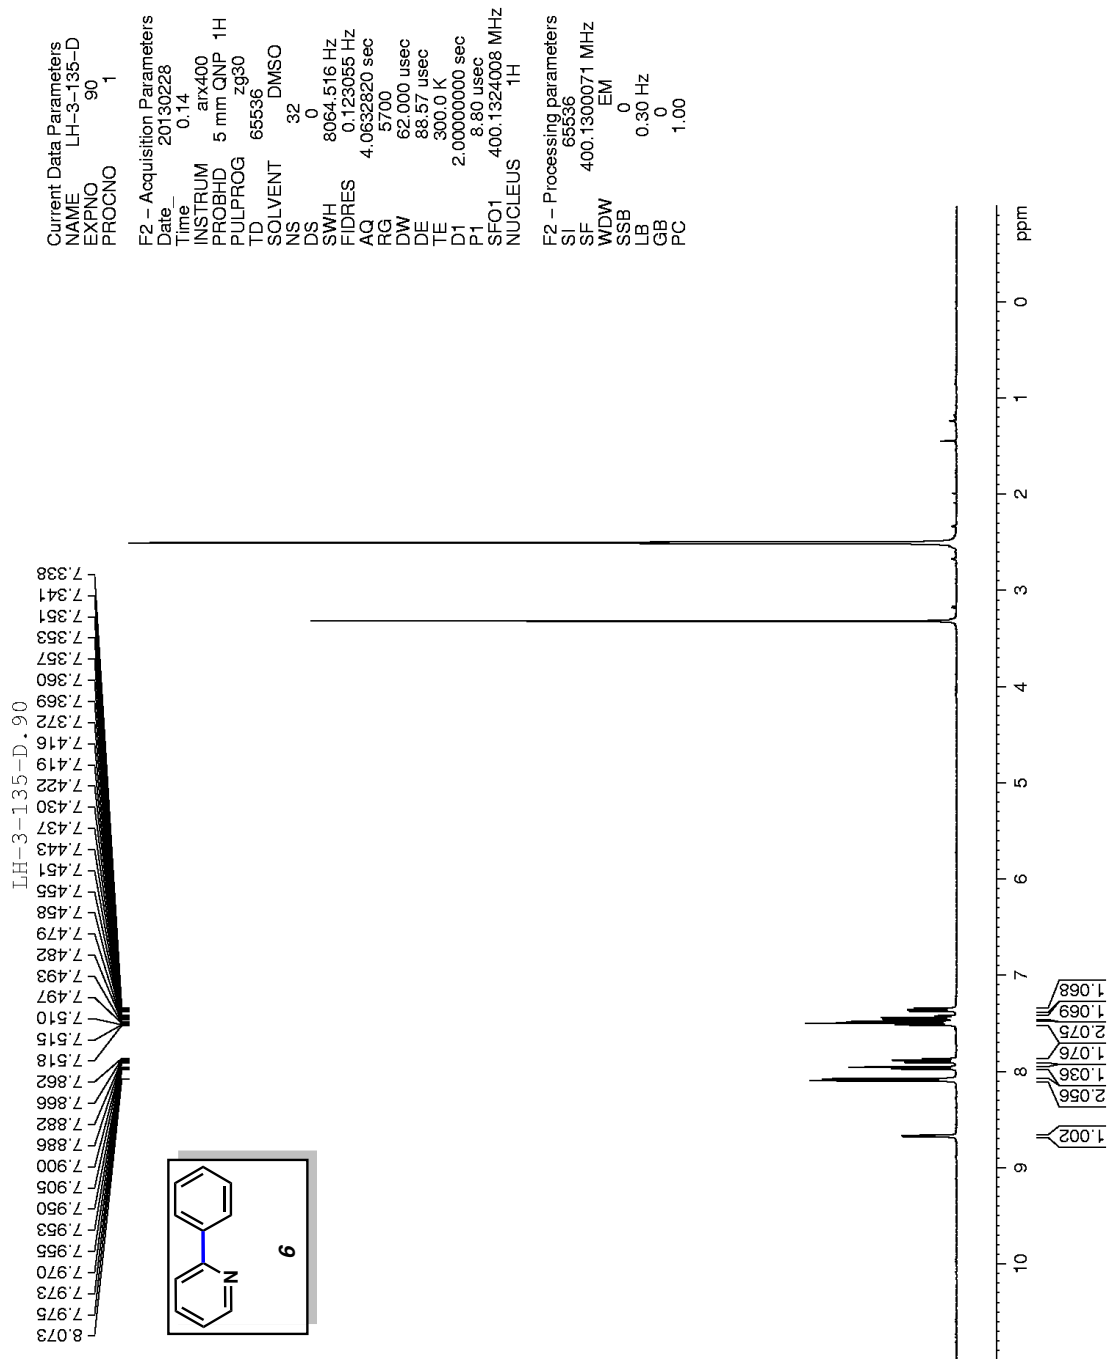



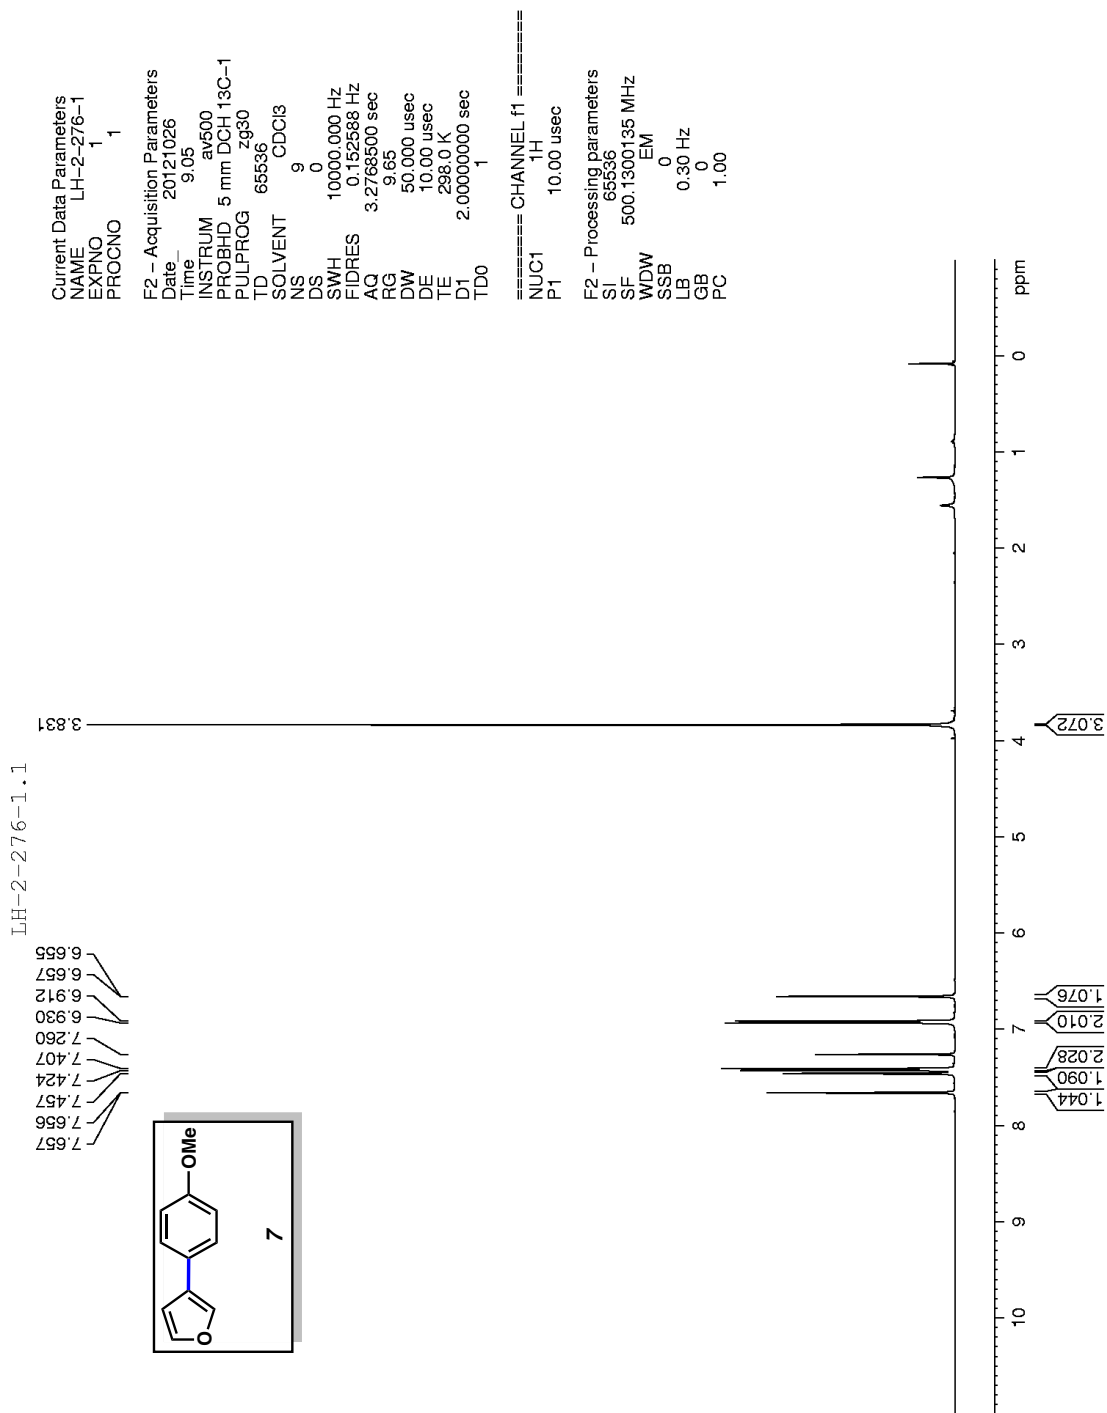

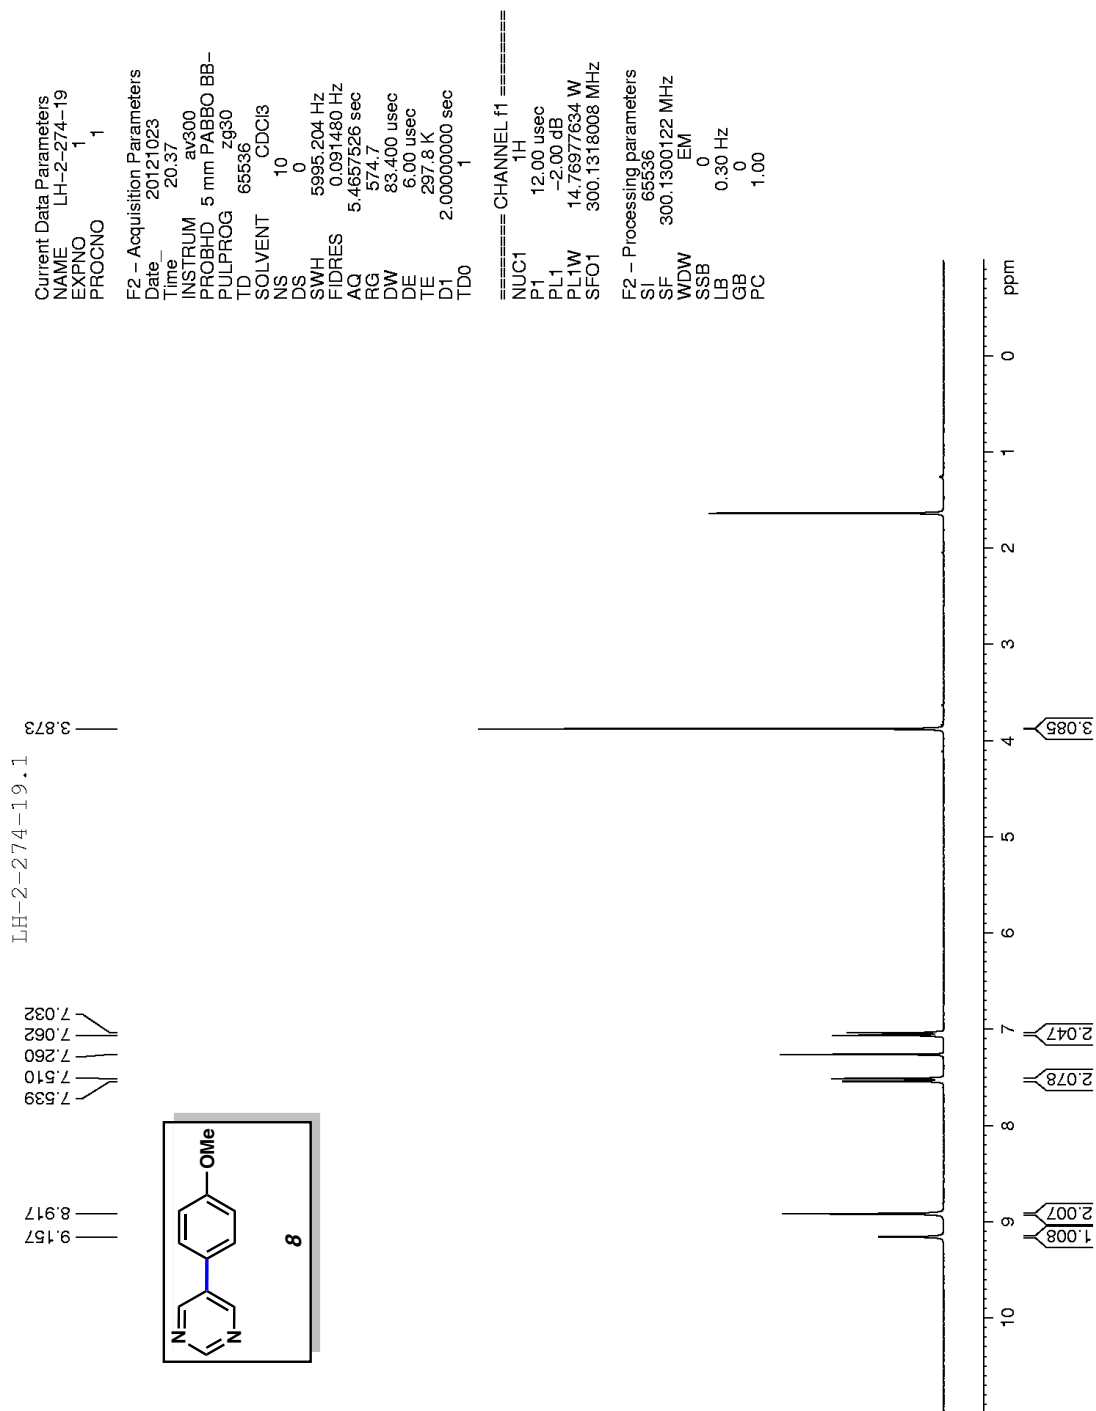

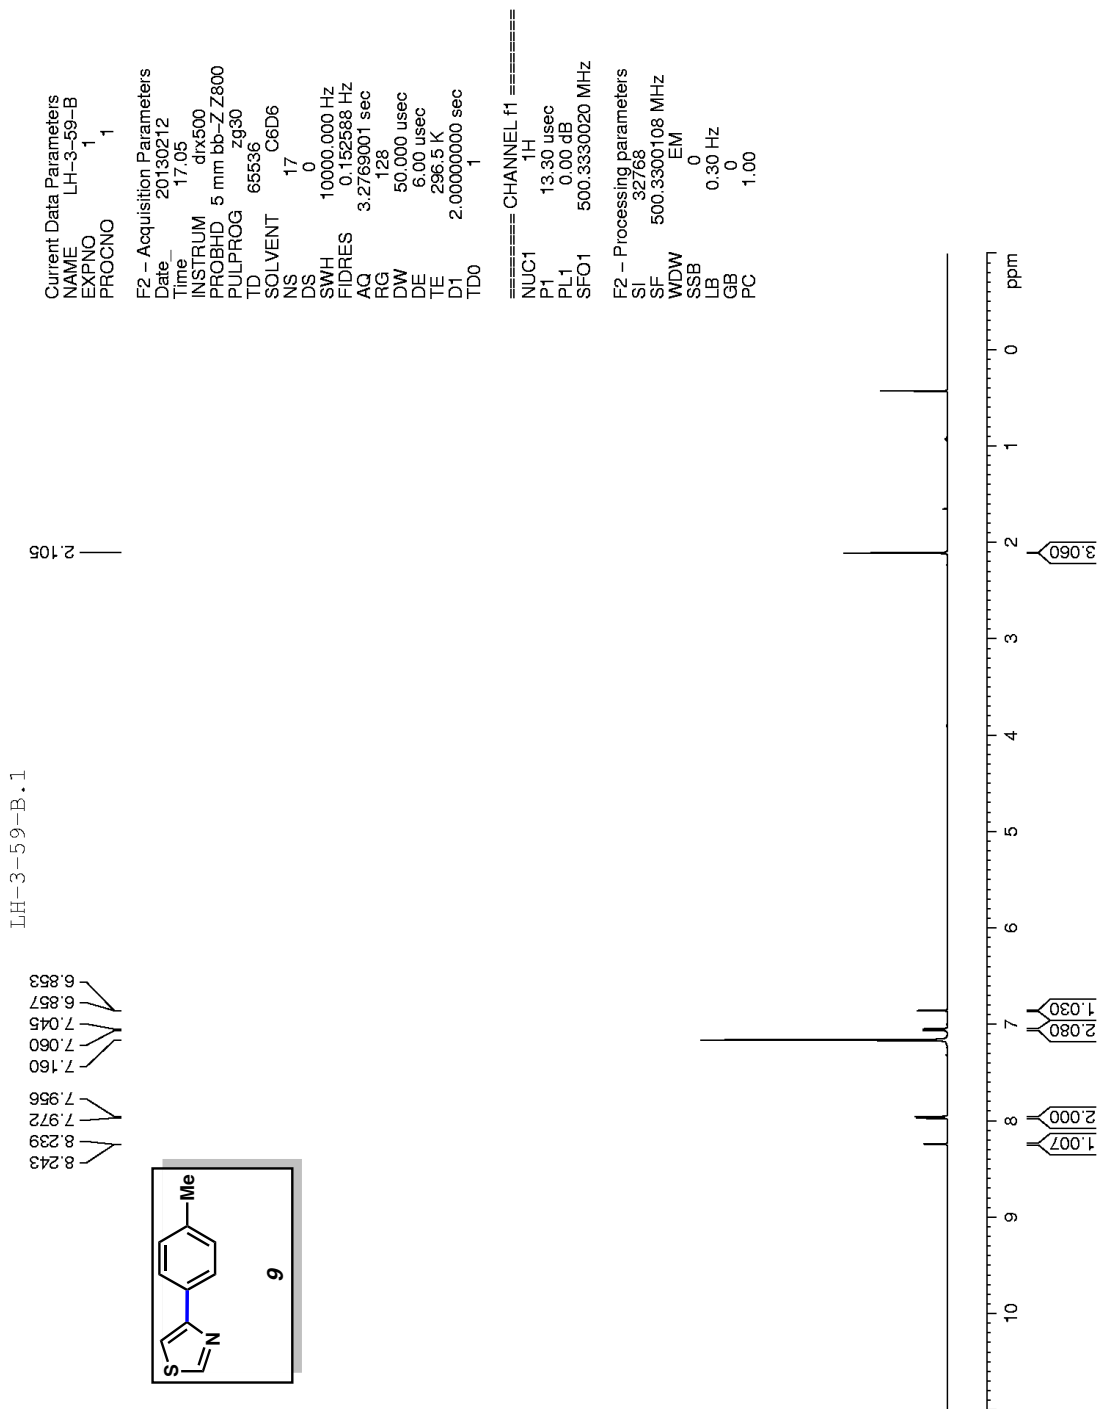

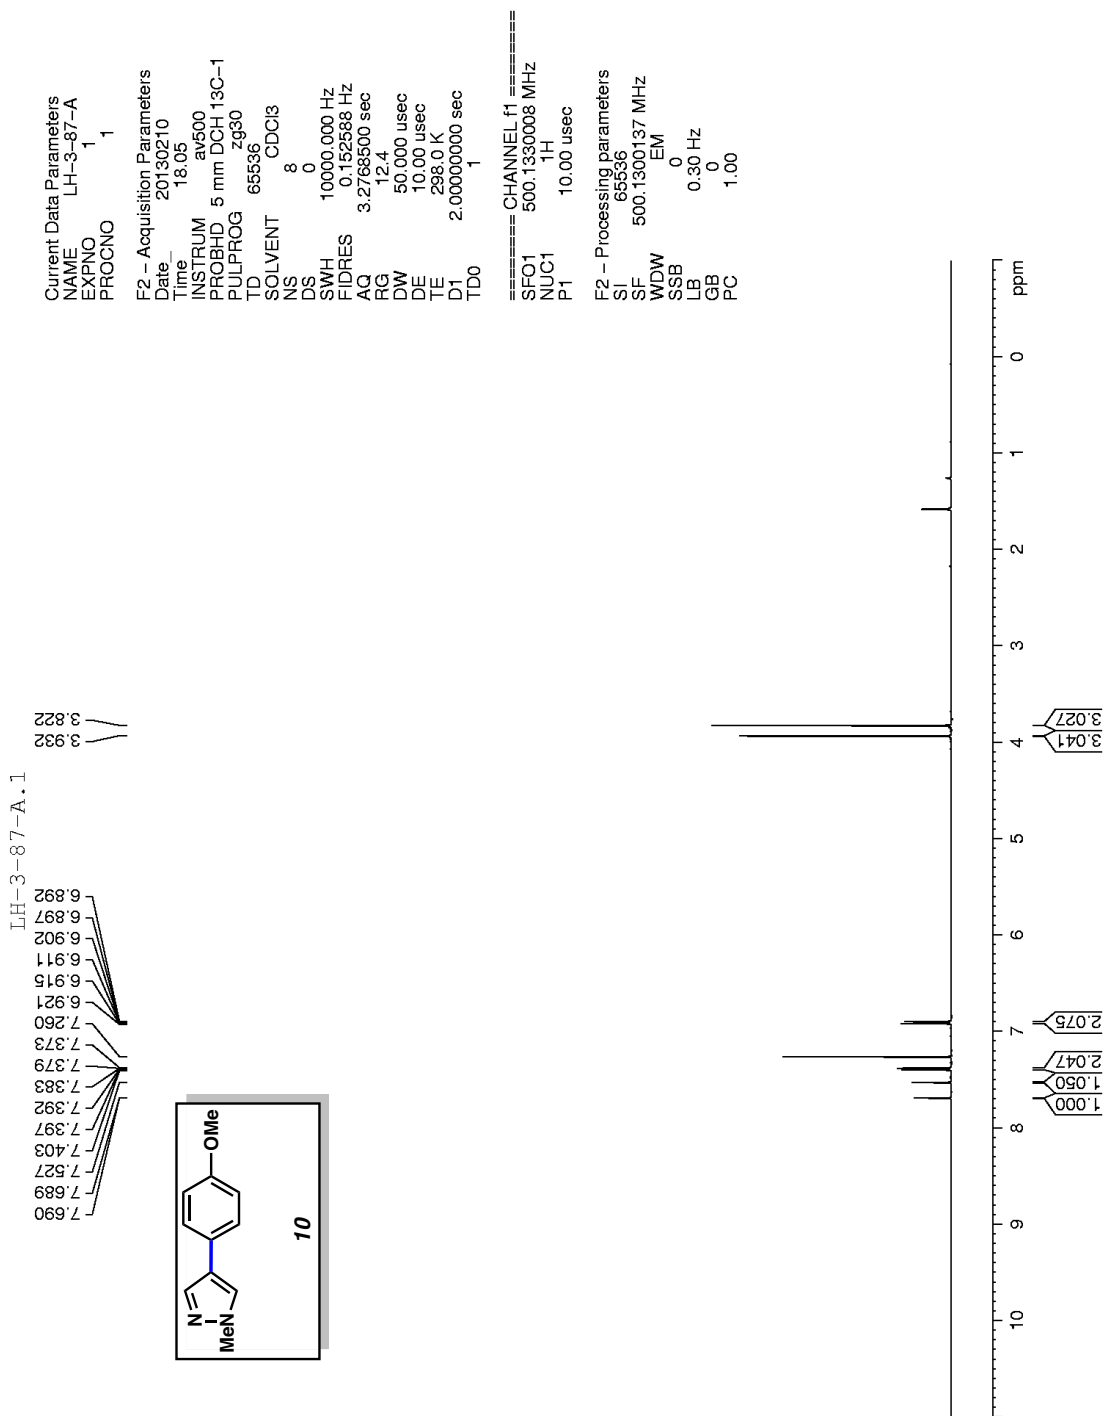

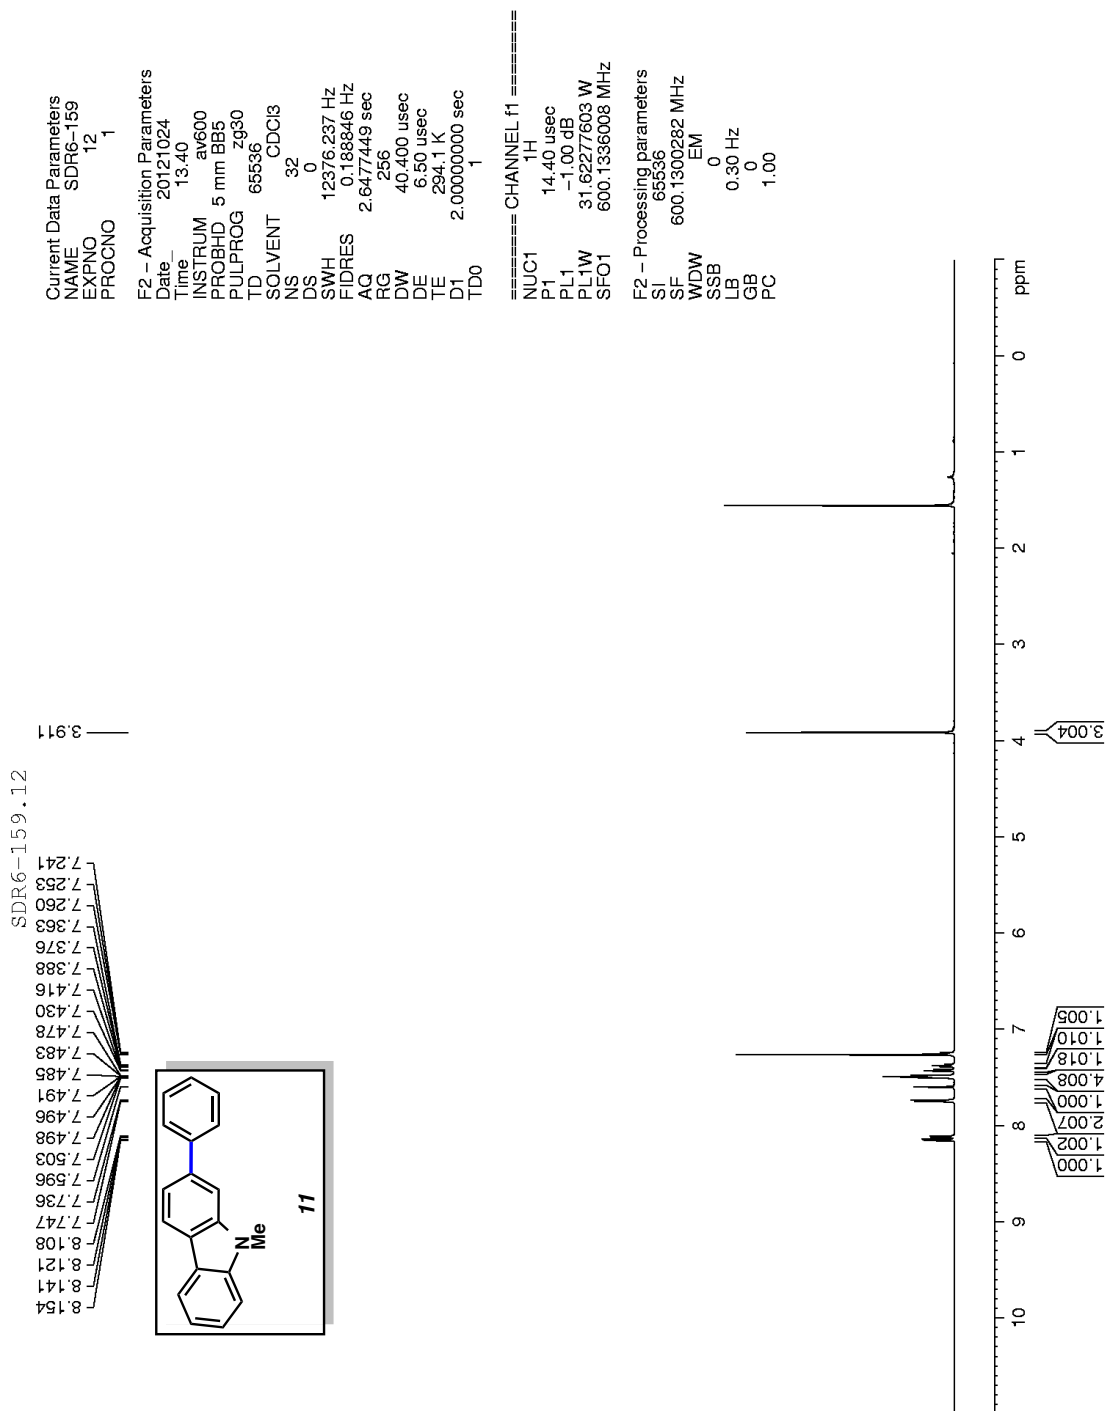

SDR7-080.121

8.237  
8.223  
8.191  
8.178  
8.166  
7.894  
7.880  
7.843  
7.830  
7.750  
7.748  
7.738  
7.736  
7.734  
7.724  
7.722  
7.551  
7.548  
7.539  
7.537  
7.526  
7.485  
7.473  
7.461  
7.260

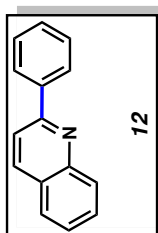

Current Data Parameters  
 NAME SDR7-080  
 EXPNO 121  
 PROCNO 1

F2 - Acquisition Parameters  
 Date\_ 20130325  
 Time 11:21  
 INSTRUM av600  
 PROBHD 5 mm BB5  
 PULPROG zg30  
 TD 65536  
 SOLVENT CDCl3  
 NS 16  
 DS 0  
 SWH 12376.237 Hz  
 FIDRES 0.188846 Hz  
 AQ 2.6477449 sec  
 RG 181  
 DW 40.400 usec  
 DE 6.50 usec  
 TE 294.3 K  
 D1 2.00000000 sec  
 TD0 1

==== CHANNEL f1 =====  
 NUC1 <sup>1</sup>H  
 P1 15.00 usec  
 PL1 -1.00 dB  
 PL1W 31.62277603 W  
 SFO1 600.1336008 MHz

F2 - Processing parameters  
 SI 65536  
 SF 600.1300284 MHz  
 WDW EM  
 SSB 0  
 LB 0.00 Hz  
 GB 0  
 PC 1.00

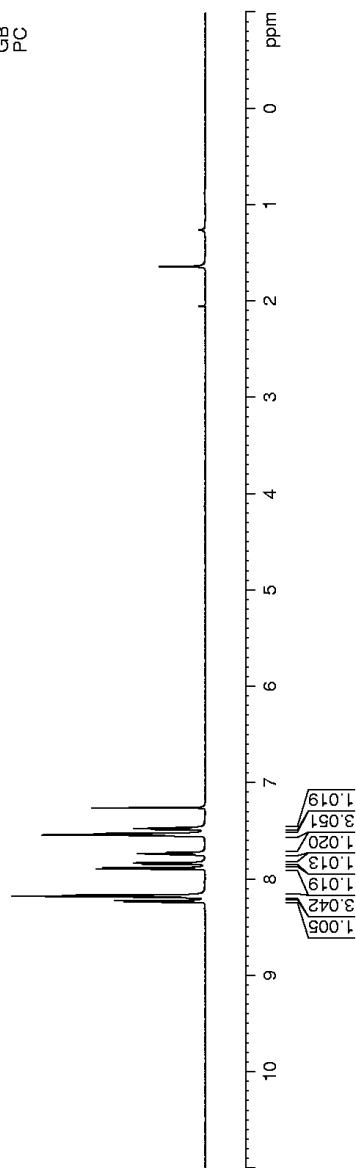

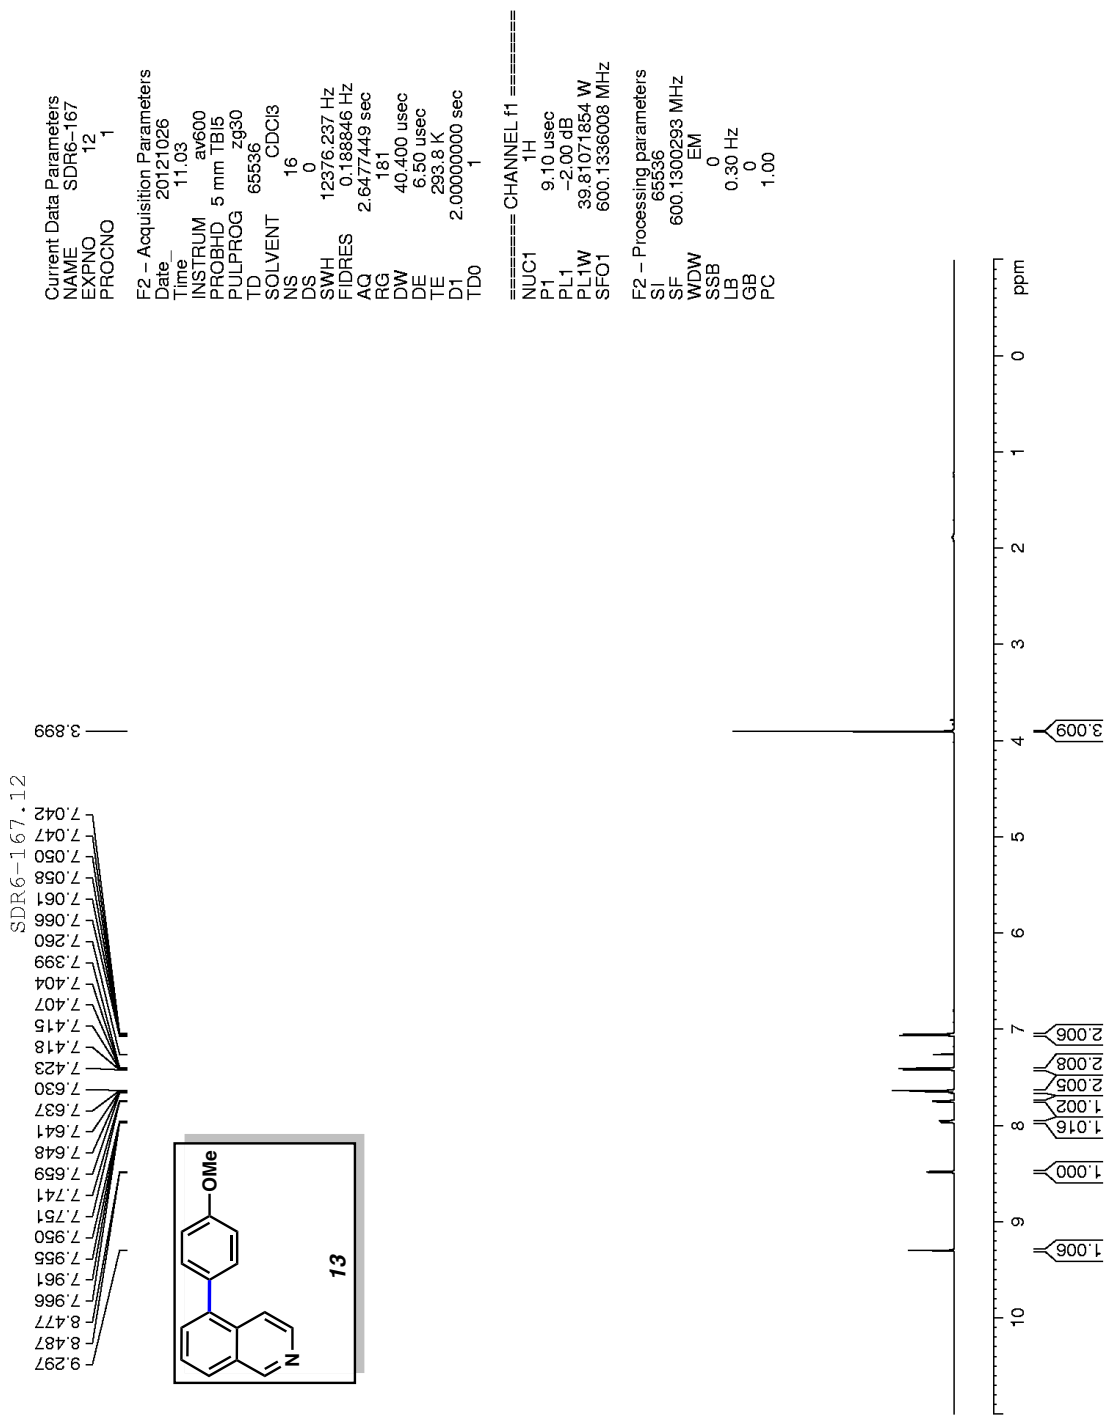

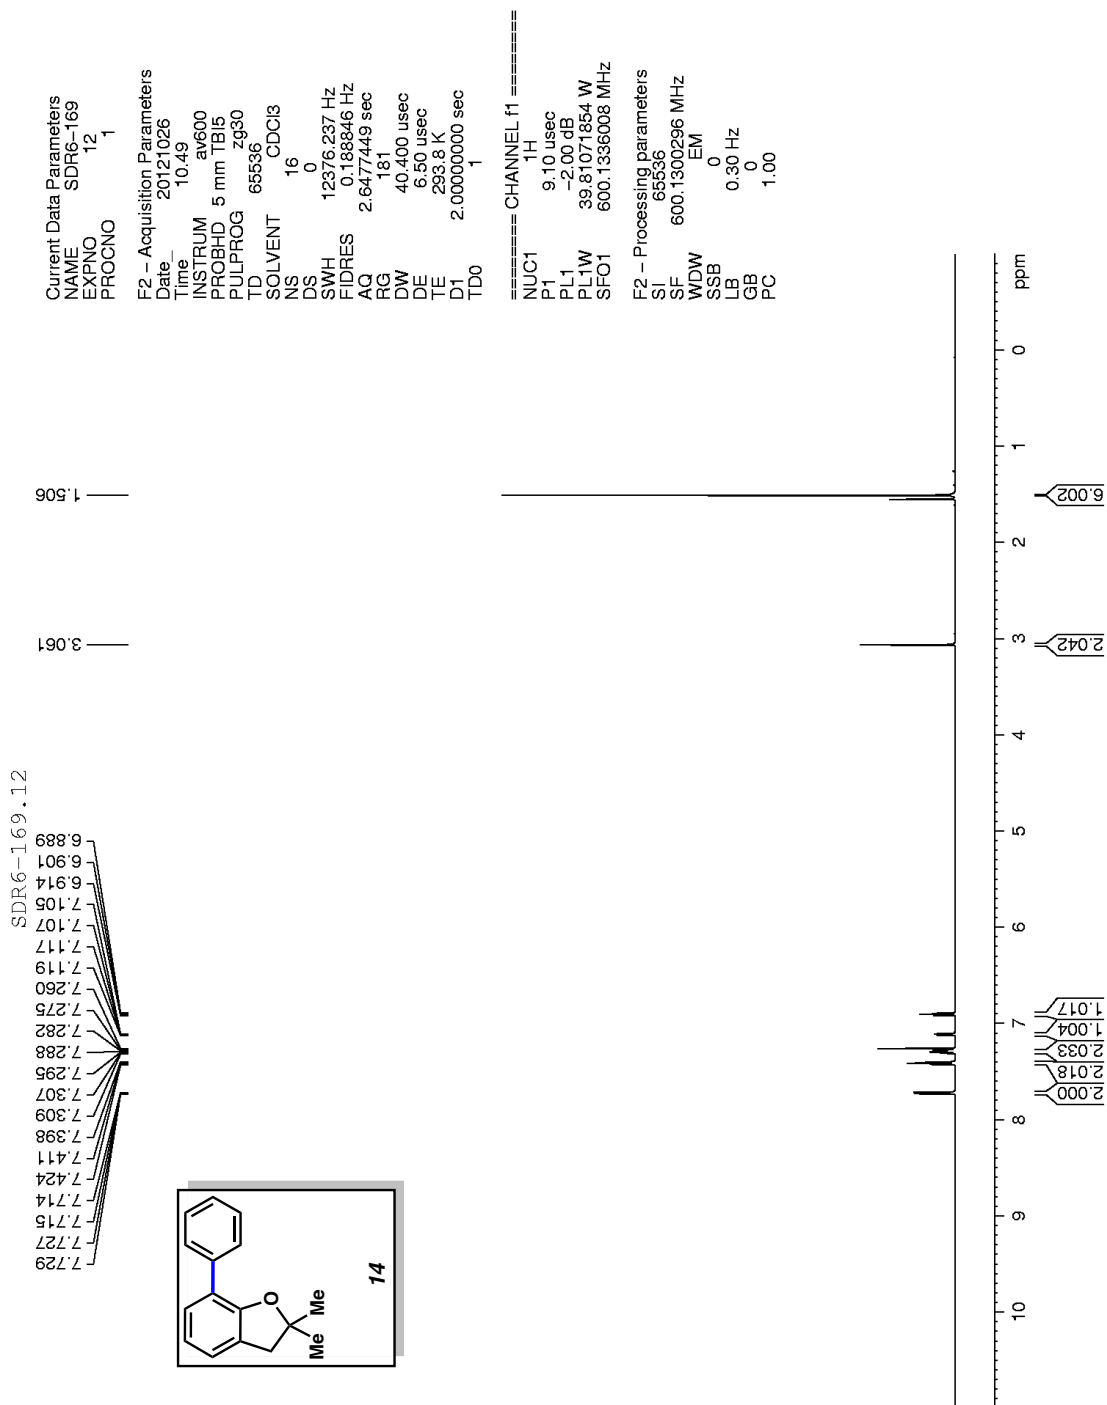



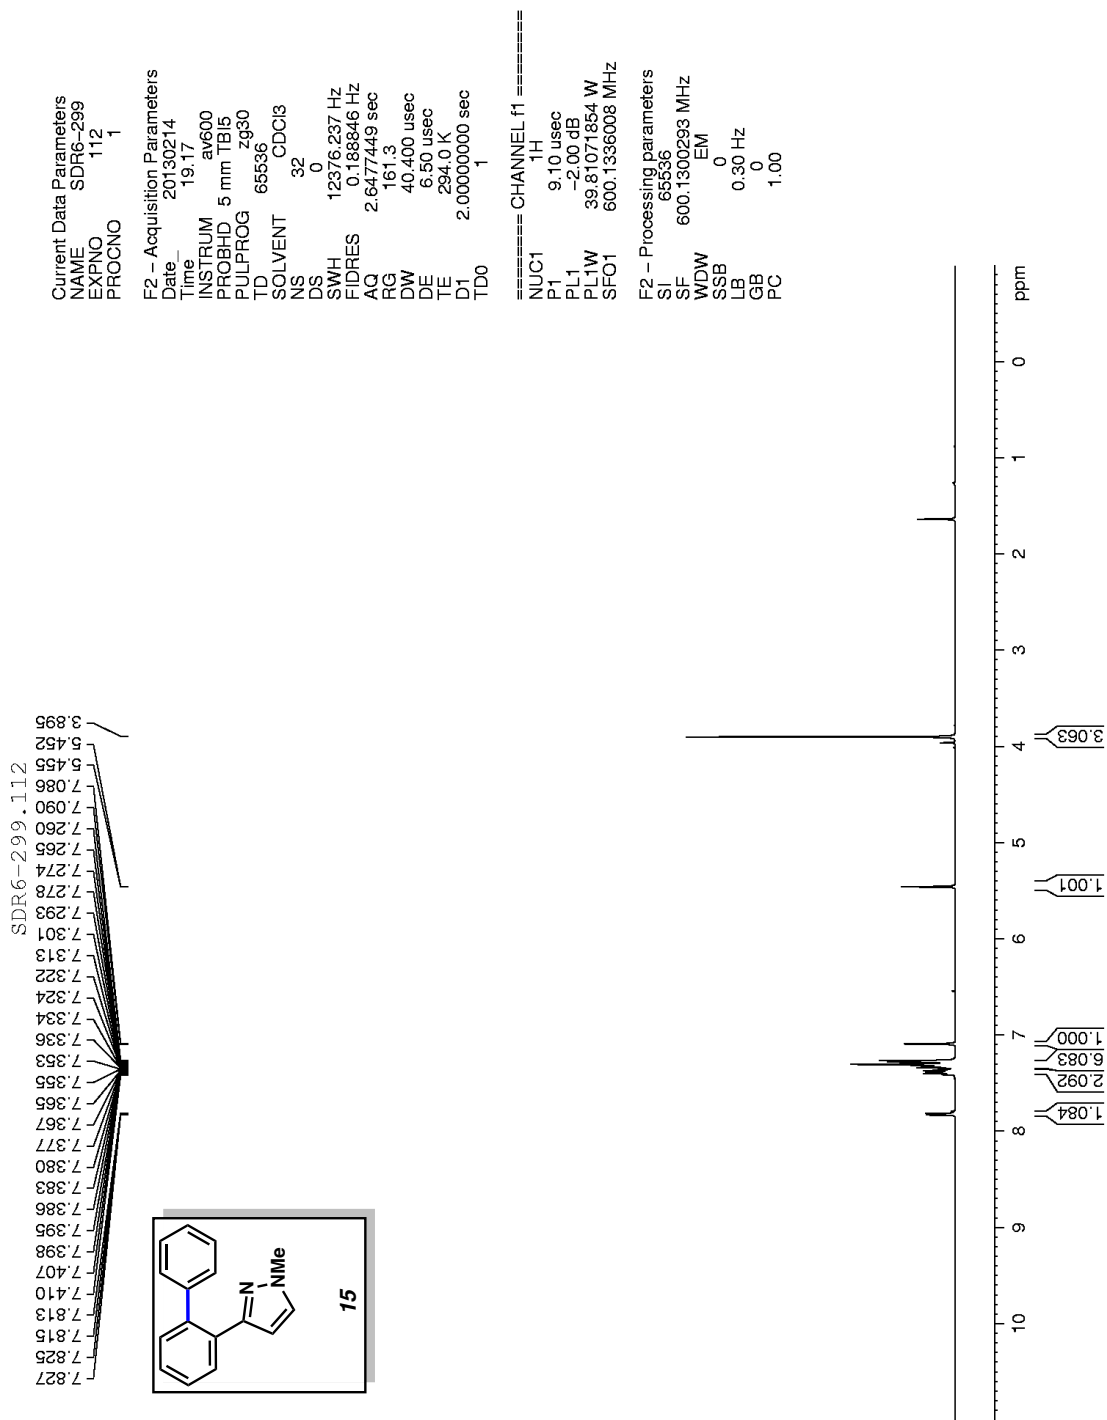

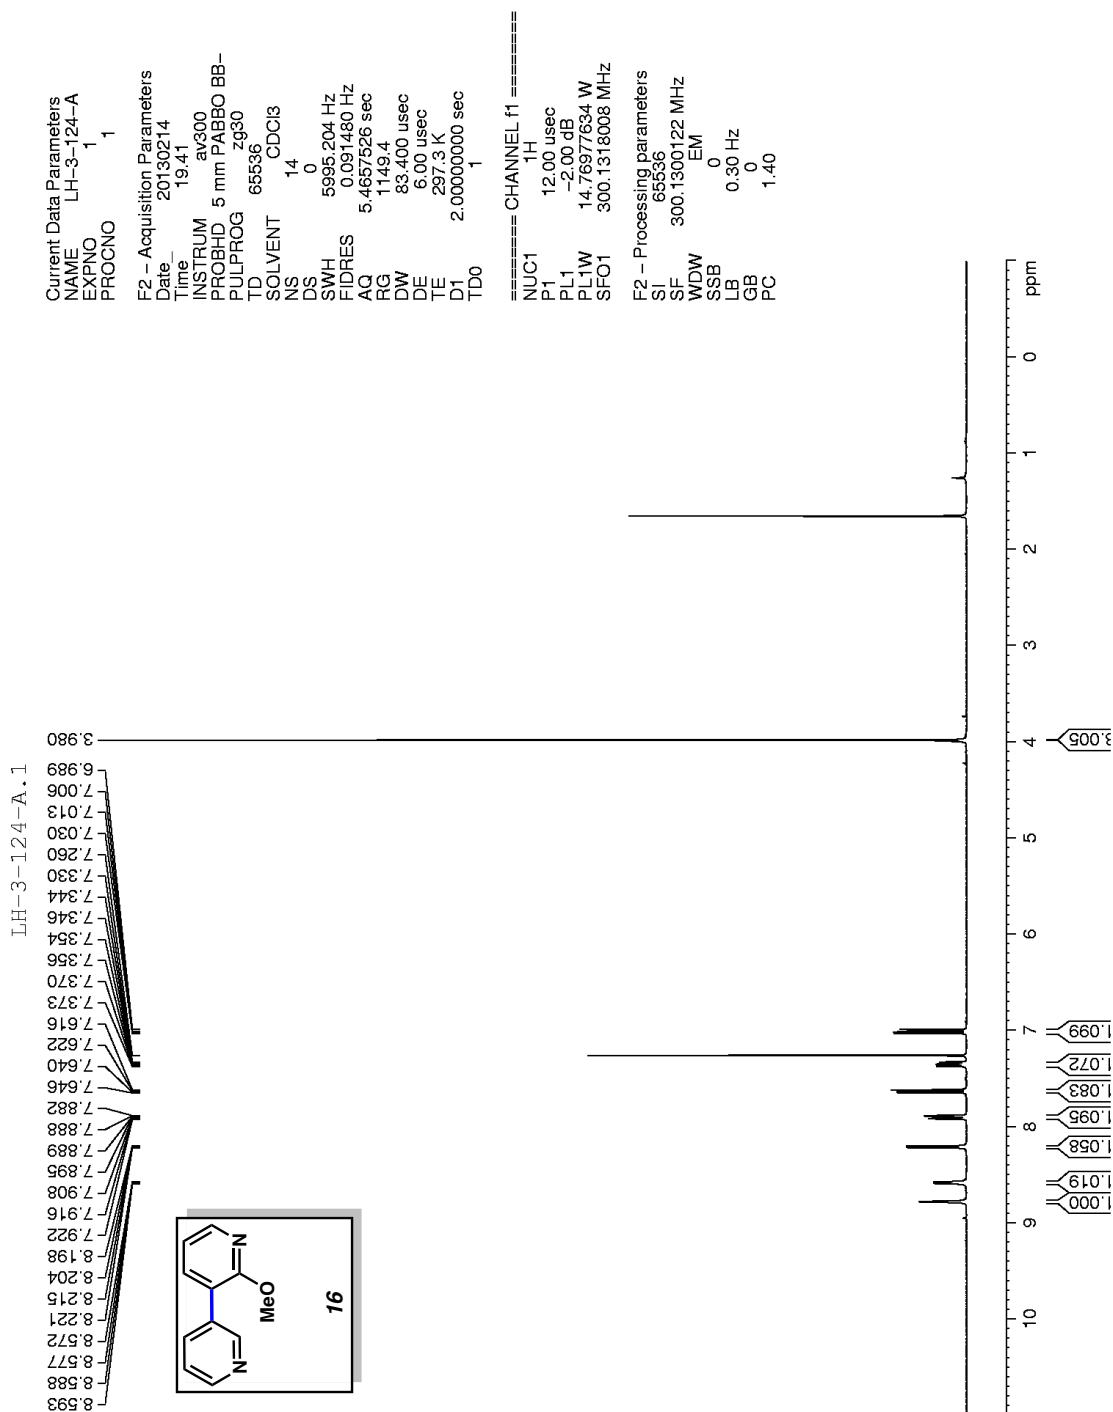

LH-3-97-A.180

8.768  
8.510  
8.505  
8.498  
8.781  
7.766  
7.762  
7.746  
7.742  
7.522  
7.518  
7.312  
7.299  
7.292  
7.285  
7.280  
7.267  
7.264  
7.260  
6.716

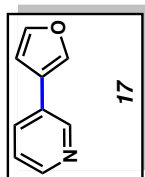

Current Data Parameters  
 NAME LH-3-97-A  
 EXPNO 180  
 PROCNO 1

F2 - Acquisition Parameters  
 Date\_ 20130206  
 Time 1.32  
 INSTRUM aix400  
 PROBHD 5 mm QNP 1H  
 PULPROG zg30  
 TD 65536  
 SOLVENT CDC13  
 NS 16  
 DS 0  
 SWH 8064.516 Hz  
 FIDRES 0.123055 Hz  
 AQ 4.0632820 sec  
 RG 1430  
 DW 62.000 usec  
 DE 88.57 usec  
 TE 300.0 K  
 D1 2.00000000 sec  
 P1 8.80 usec  
 SFO1 400.1324008 MHz  
 NUCLEUS 1H

F2 - Processing parameters  
 SI 65536  
 SF 400.1300168 MHz  
 WDW EM  
 SSB 0  
 LB 0.30 Hz  
 GB 0  
 PC 1.00

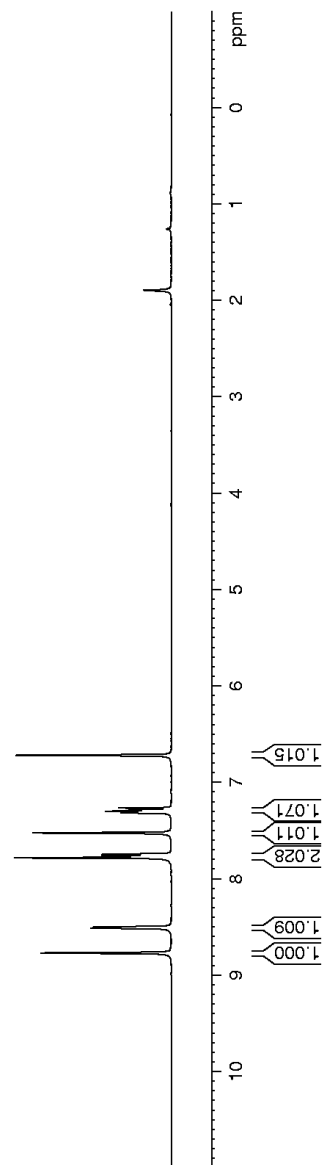



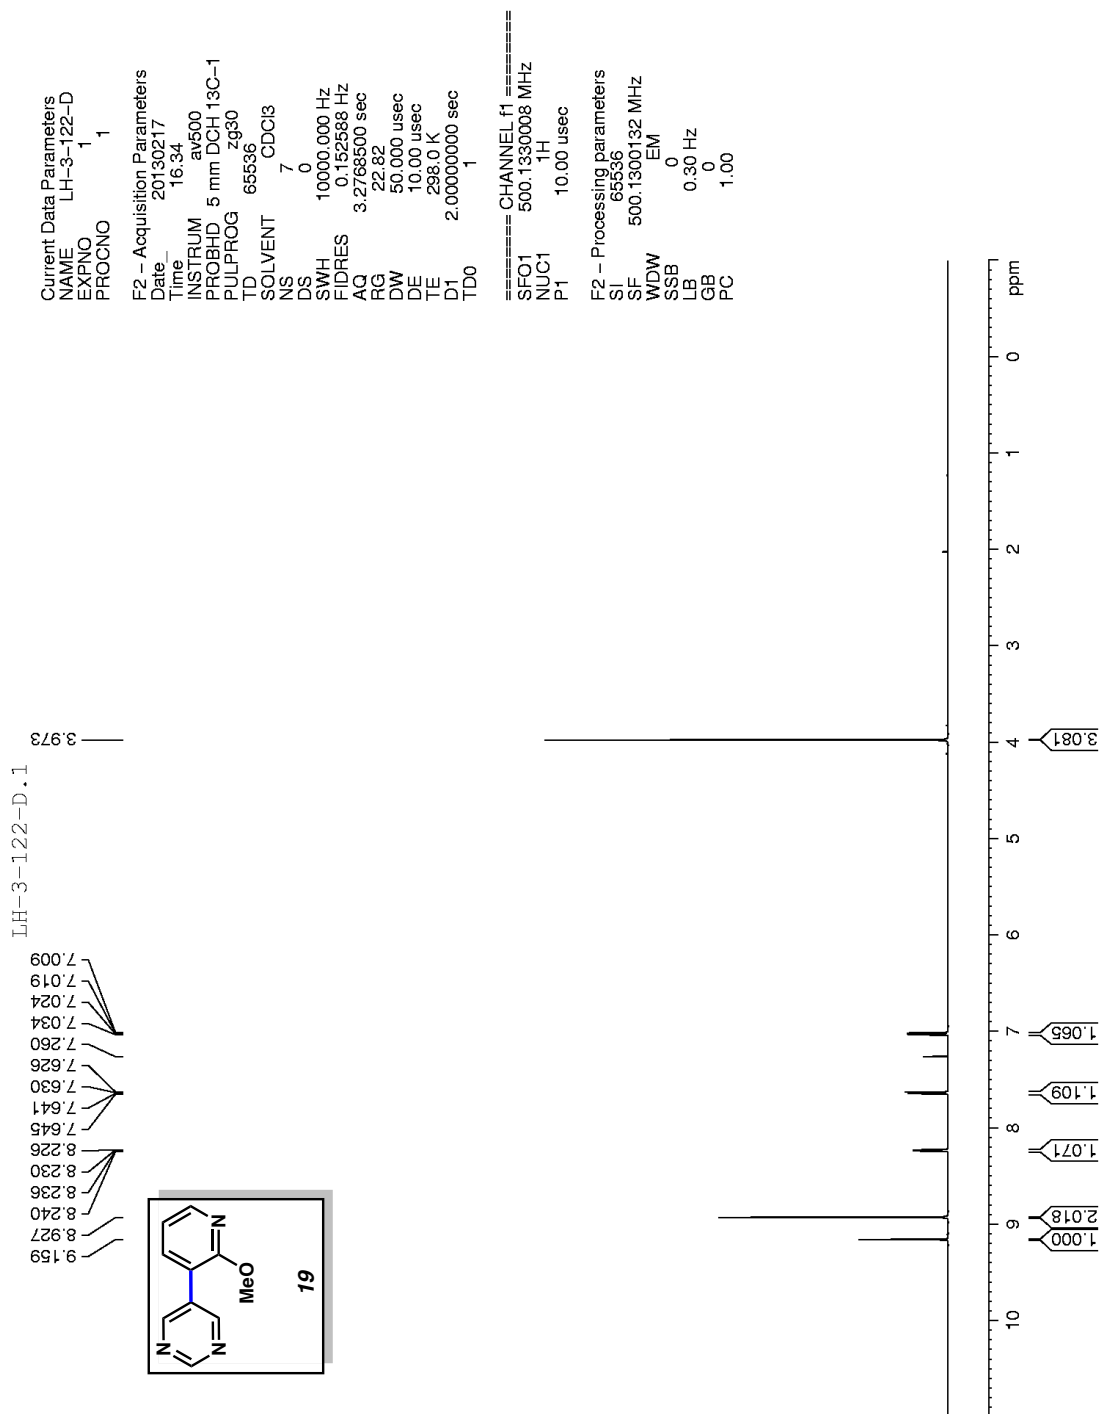

LH-3-99-A.1

9.120  
8.856  
7.842  
7.574  
7.260  
6.736  
6.734

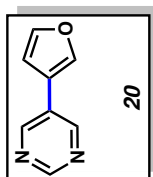

Current Data Parameters  
NAME LH-3-99-A  
EXPNO 1  
PROCNO 1

F2 - Acquisition Parameters  
Date\_ 20130206  
Time 13:40  
INSTRUM av500  
PROBHD 5 mm DCH 13C-1  
PULPROG zg30  
TD 65536  
SOLVENT CDCI3  
NS 8  
DS 0  
SWH 10000.000 Hz  
FIDRES 0.152588 Hz  
AQ 3.2768500 sec  
RG 11  
DW 50.000 usec  
DE 10.00 usec  
TE 298.0 K  
D1 2.00000000 sec  
TD0 1

==== CHANNEL f1 =====  
SFO1 500.1330008 MHz  
NUC1 1H  
P1 10.00 usec

F2 - Processing parameters  
SI 65536  
SF 500.1300137 MHz  
WDW EM  
SSB 0  
LB 0.30 Hz  
GB 0  
PC 1.00

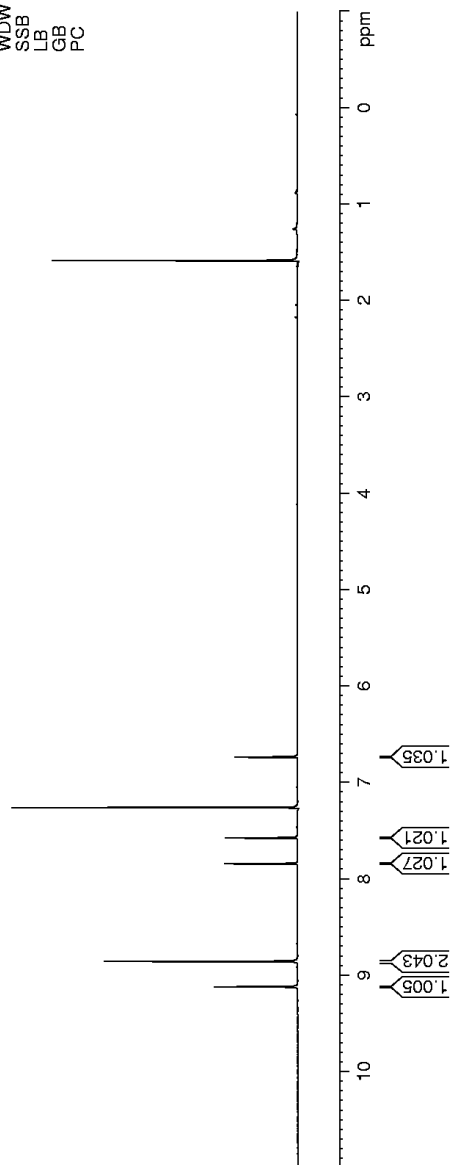

LH-3-102-B.1

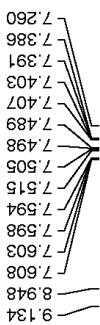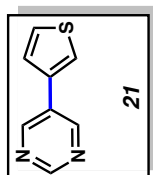

Current Data Parameters  
 NAME LH-3-102-B  
 EXPNO 1  
 PROCNO 1

F2 - Acquisition Parameters  
 Date\_ 20130207  
 Time 19:38  
 INSTRUM av300  
 PROBHD 5 mm PABBO BB-  
 PULPROG zg30  
 TD 65536  
 SOLVENT CDCl3  
 NS 12  
 DS 0  
 SWH 5995.204 Hz  
 FIDRES 0.091480 Hz  
 AQ 5.4657526 sec  
 RG 812.7  
 DW 83.400 usec  
 DE 6.00 usec  
 TE 297.7 K  
 D1 2.00000000 sec  
 TD0 1

==== CHANNEL f1 =====  
 NUC1 1H  
 P1 12.00 usec  
 PL1 -2.00 dB  
 PL1W 14.76977634 W  
 SFO1 300.1318008 MHz

F2 - Processing parameters  
 SI 65536  
 SF 300.1300122 MHz  
 WDW EM  
 SSB 0  
 LB 0.30 Hz  
 GB 0  
 PC 1.40

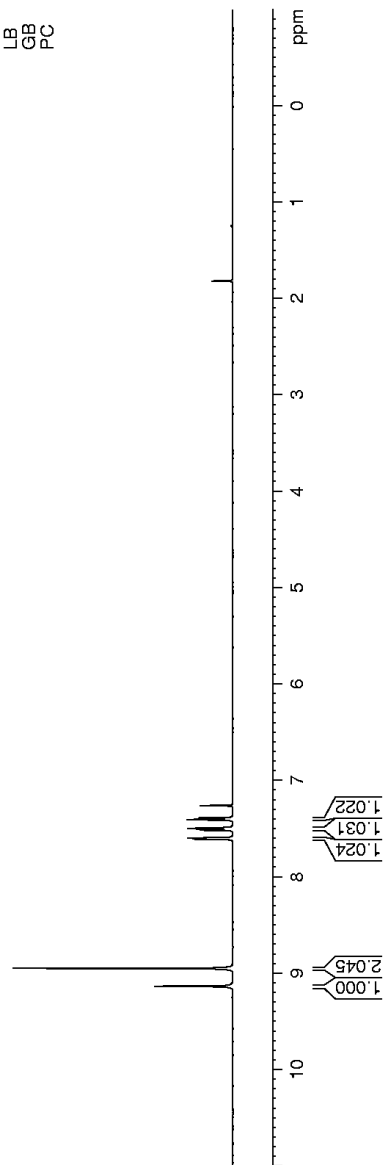

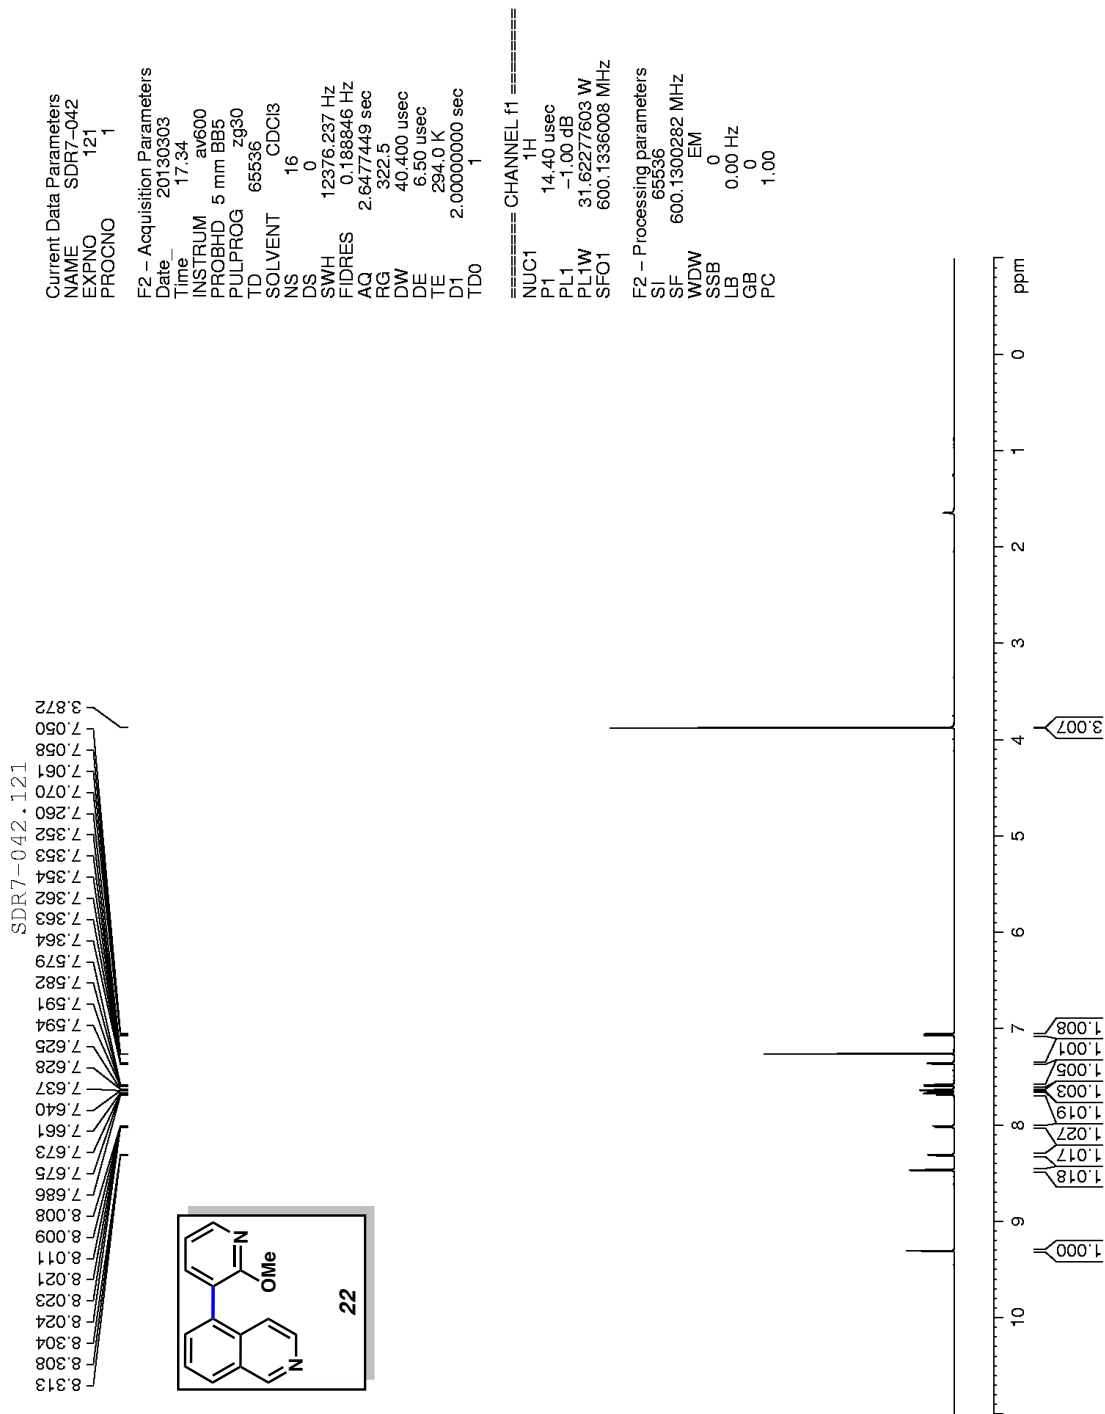



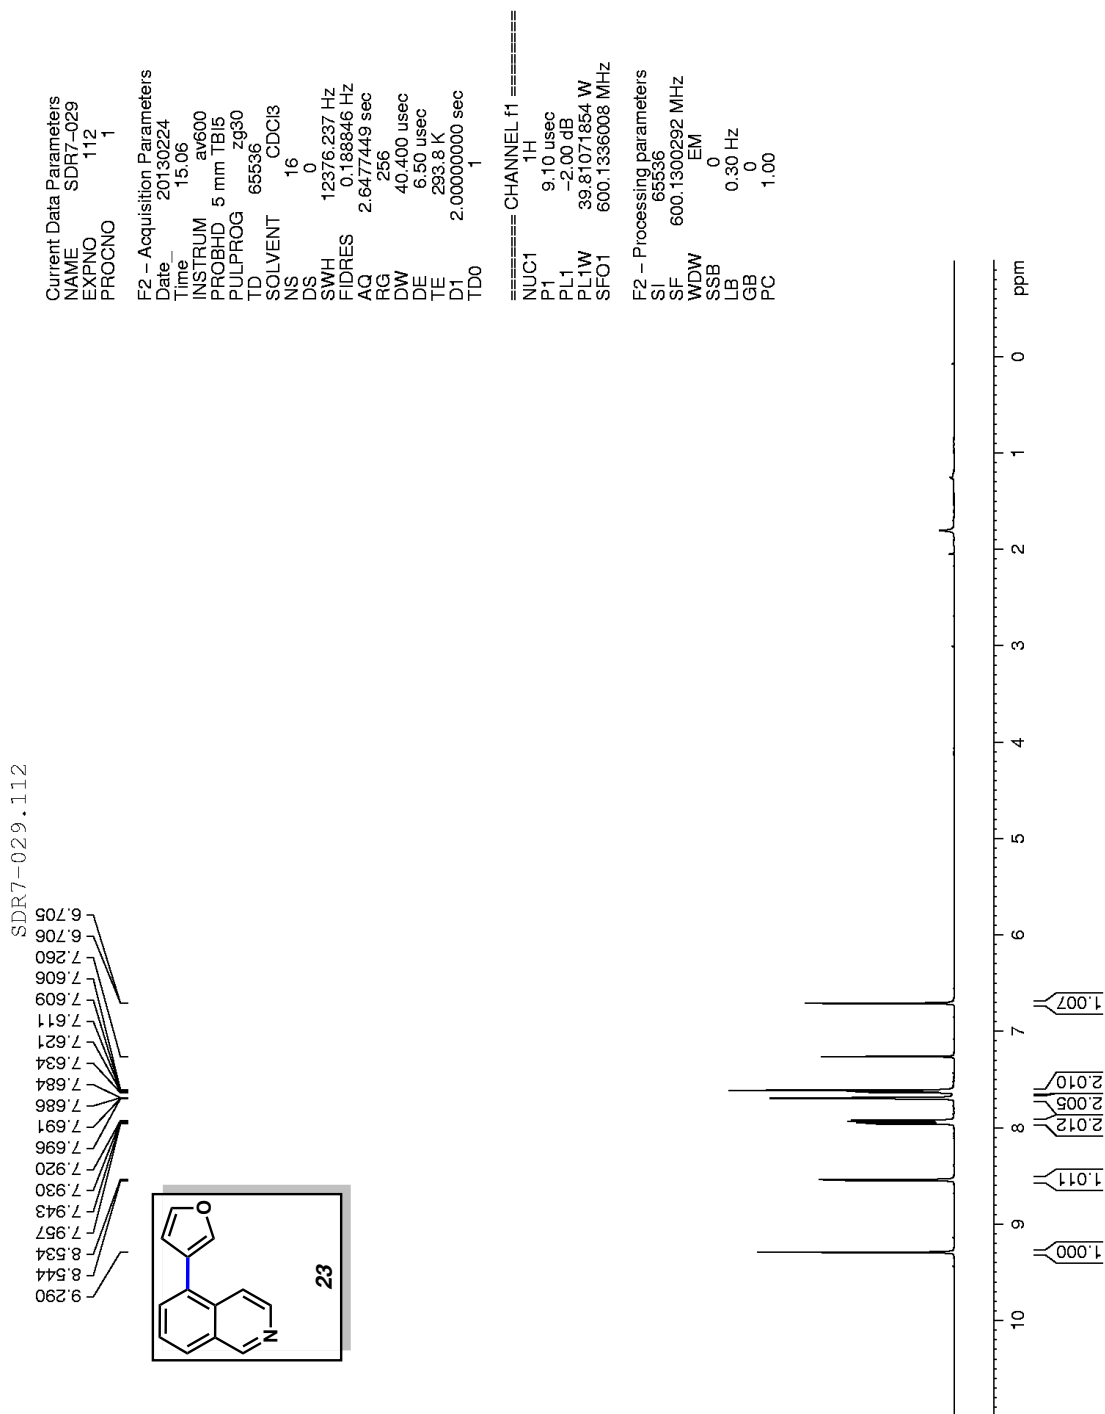

SDR7-034.112

9.298  
8.522  
8.512  
7.974  
7.960  
7.859  
7.849  
7.720  
7.718  
7.708  
7.706  
7.649  
7.636  
7.623  
7.507  
7.502  
7.499  
7.494  
7.428  
7.426  
7.423  
7.421  
7.421  
7.309  
7.307  
7.301  
7.299  
7.260

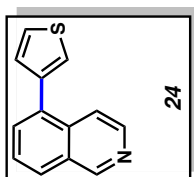

Current Data Parameters  
NAME SDR7-034  
EXPNO 112  
PROCNO 1

F2 - Acquisition Parameters  
Date\_ 20130226  
Time 16:53  
INSTRUM av600  
PROBHD 5 mm TBI5  
PULPROG zg30  
TD 65536  
SOLVENT CDCI3  
NS 16  
DS 0  
SWH 12376.237 Hz  
FIDRES 0.188846 Hz  
AQ 2.6477449 sec  
RG 228.1  
DW 40.400 usec  
DE 6.50 usec  
TE 293.9 K  
D1 2.00000000 sec  
TD0 1

==== CHANNEL f1 =====  
NUC1 1H  
P1 9.10 usec  
PL1 -2.00 dB  
PL1W 39.81071854 W  
SFO1 600.1336008 MHz

F2 - Processing parameters  
SI 65536  
SF 600.1300293 MHz  
WDW EM  
SSB 0  
LB 0.30 Hz  
GB 0  
PC 1.00

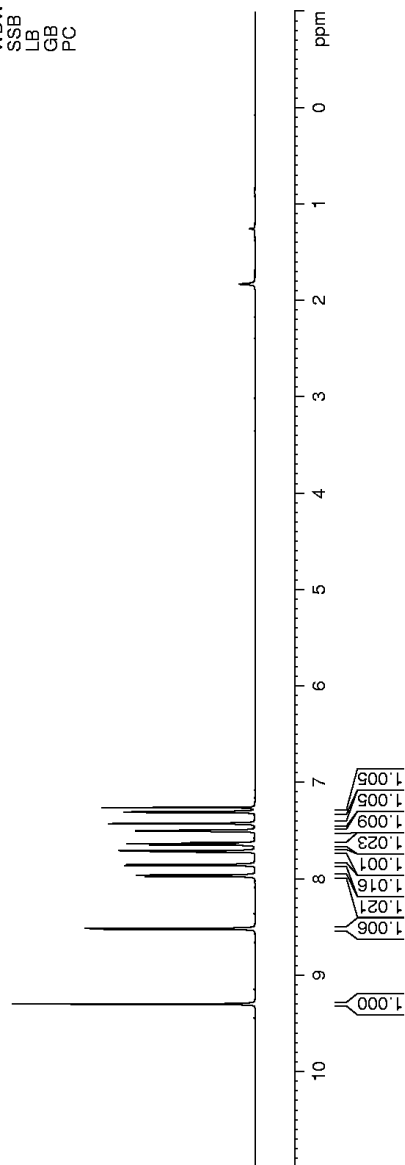



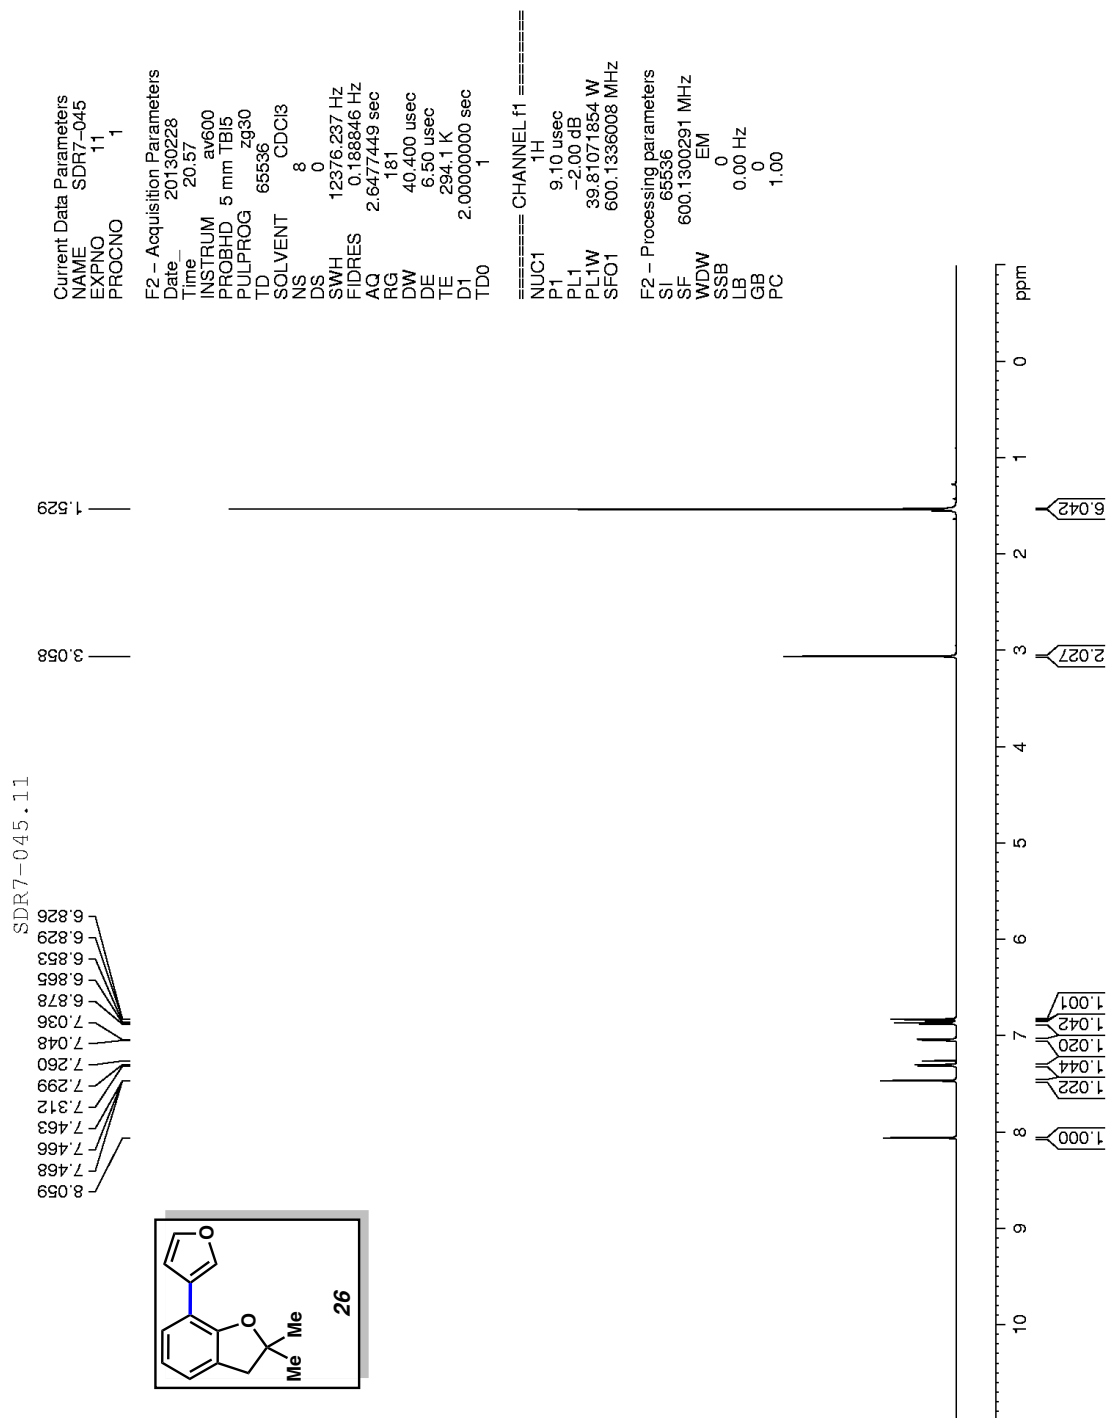

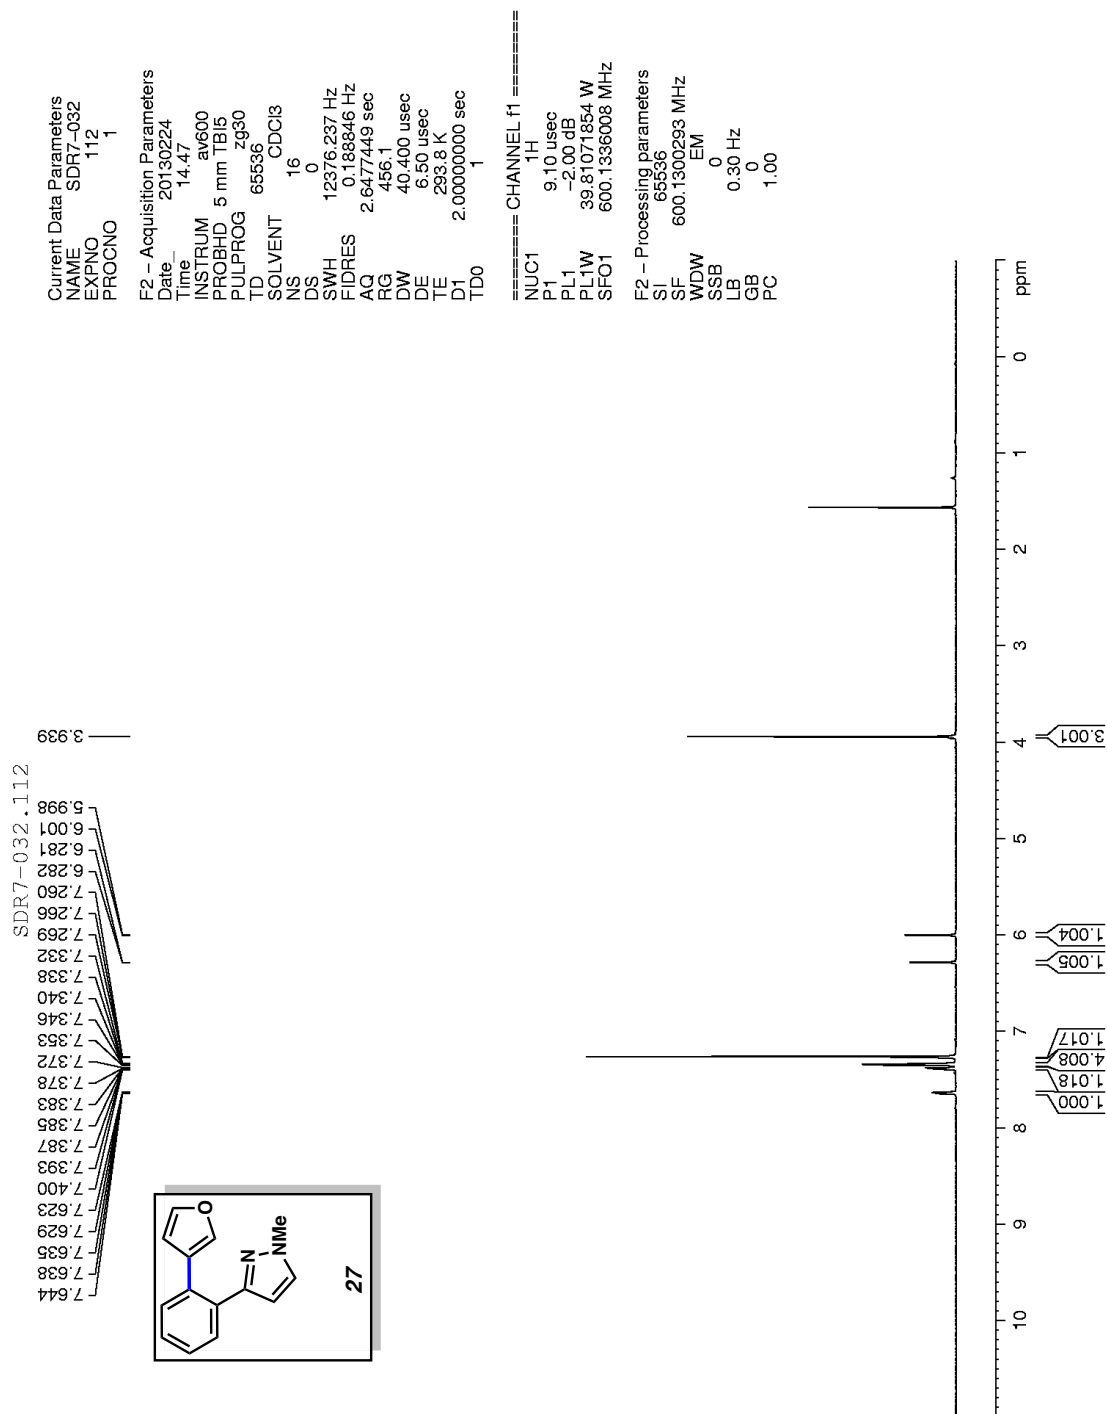

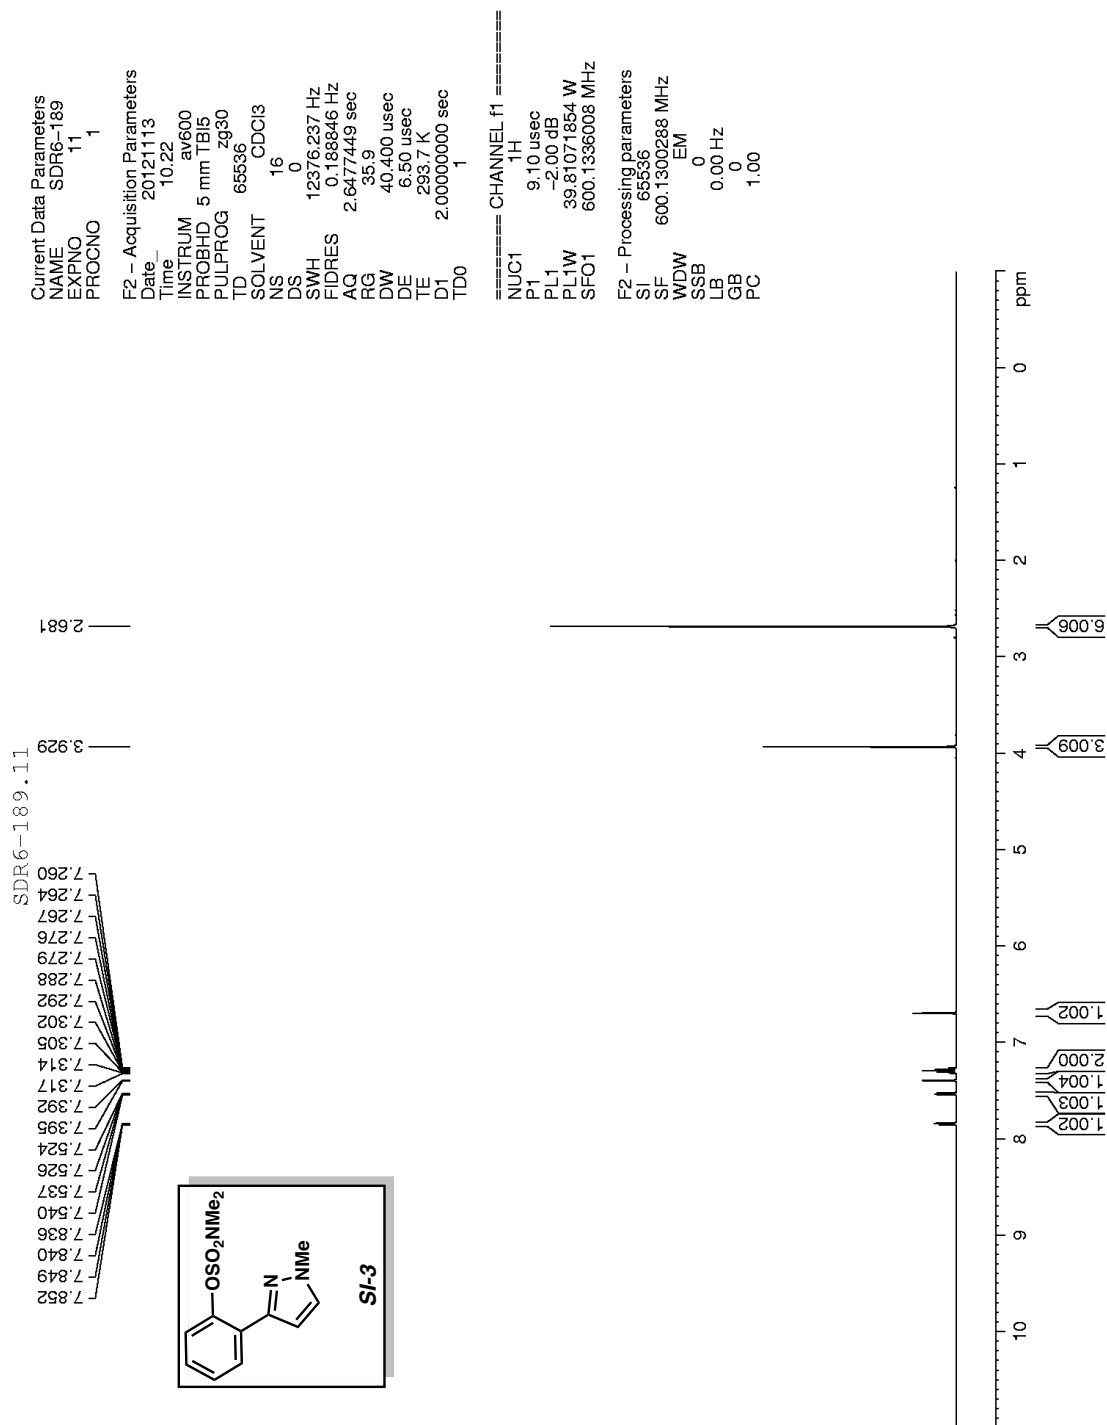

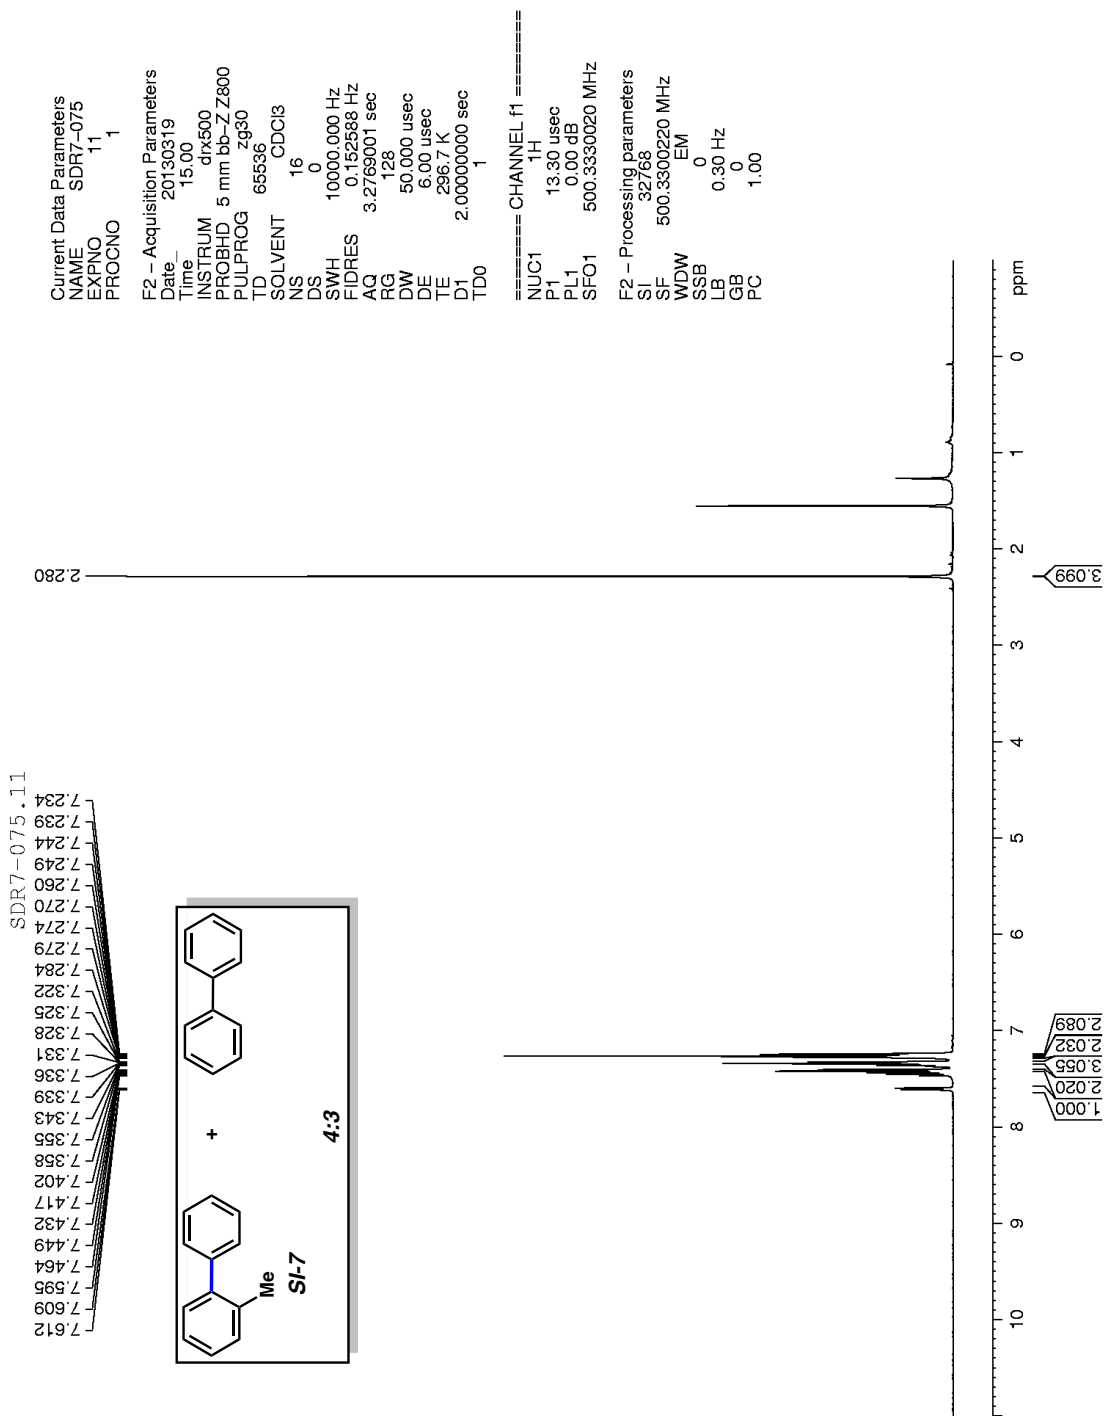

# $^{13}\text{C}$ NMR Spectra



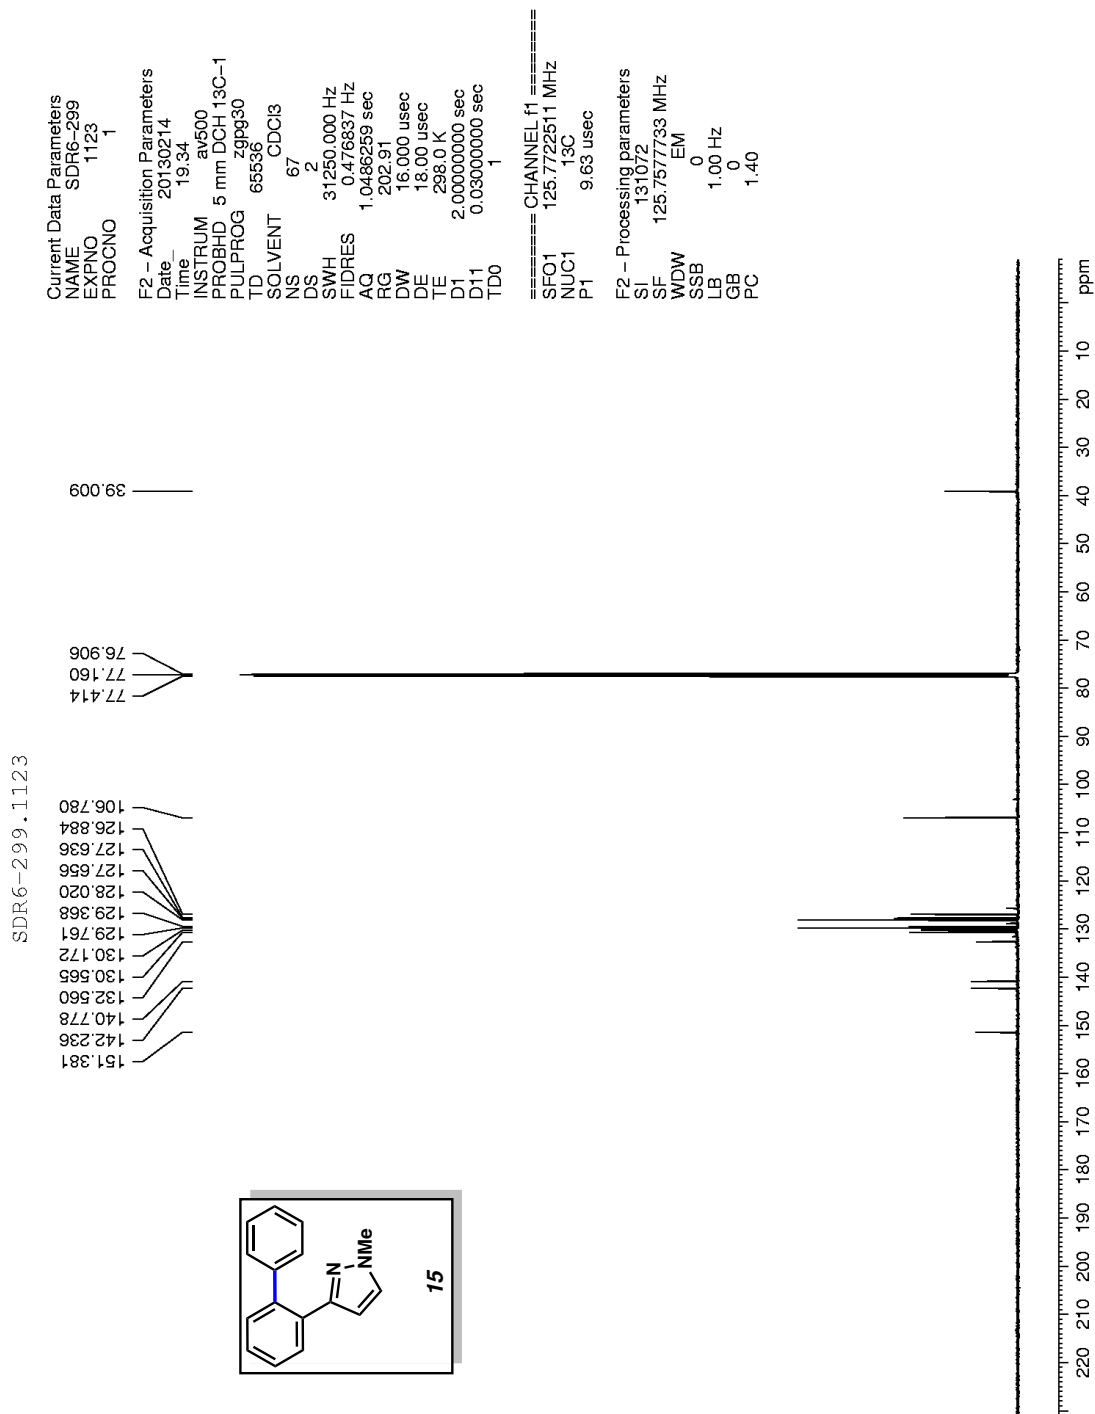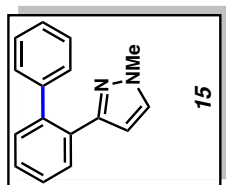

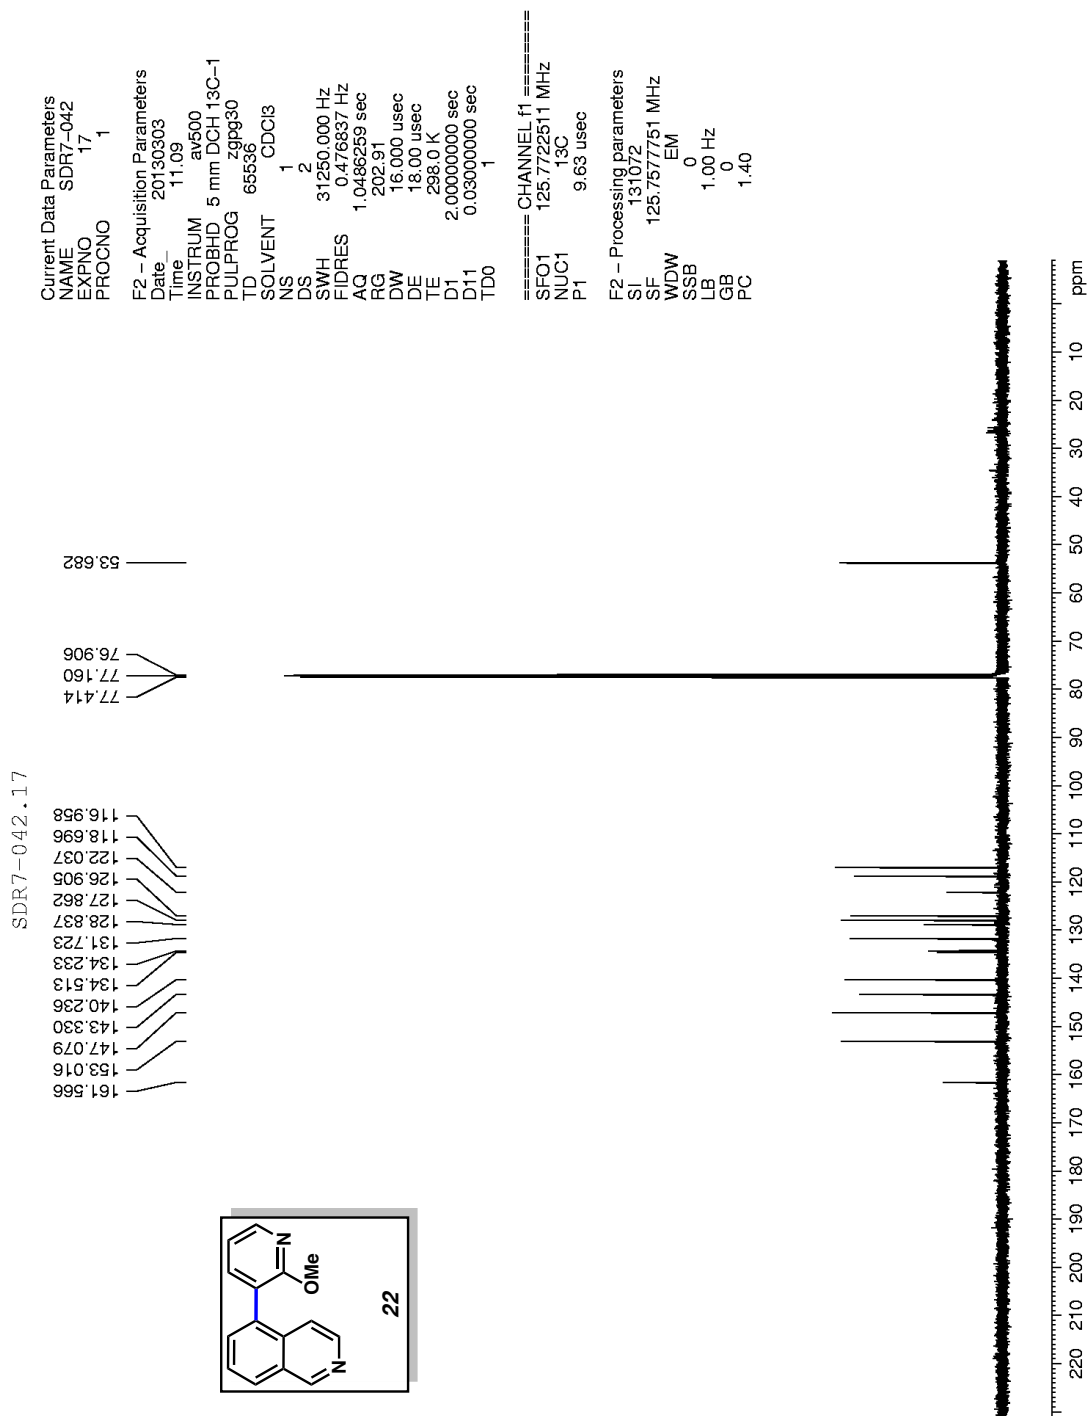

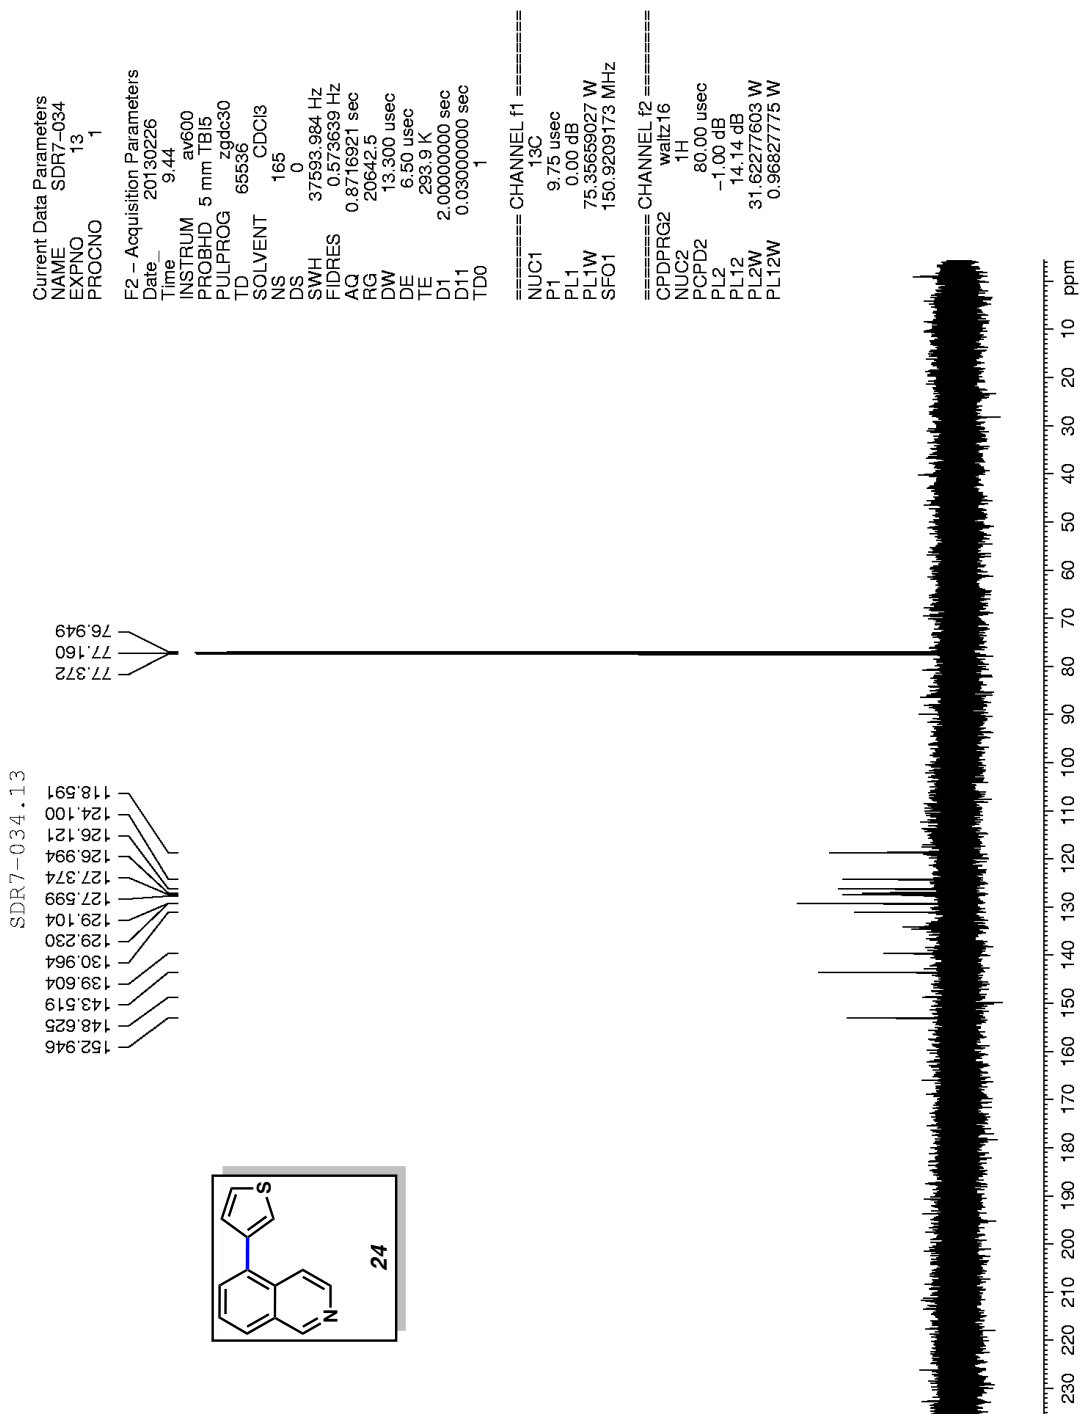

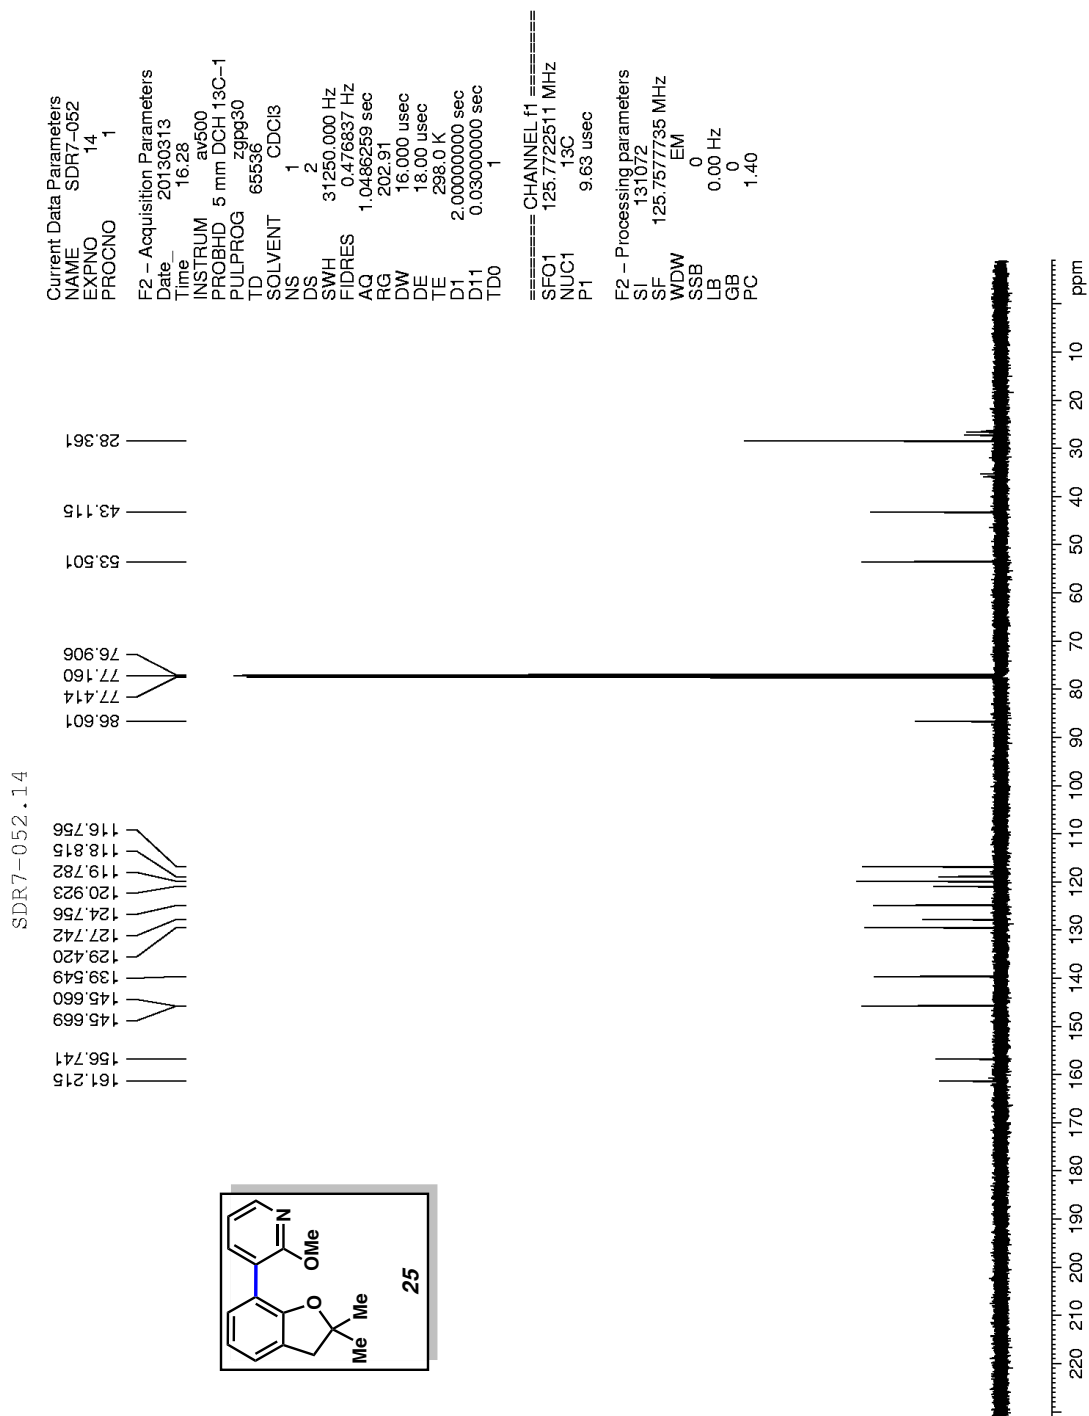

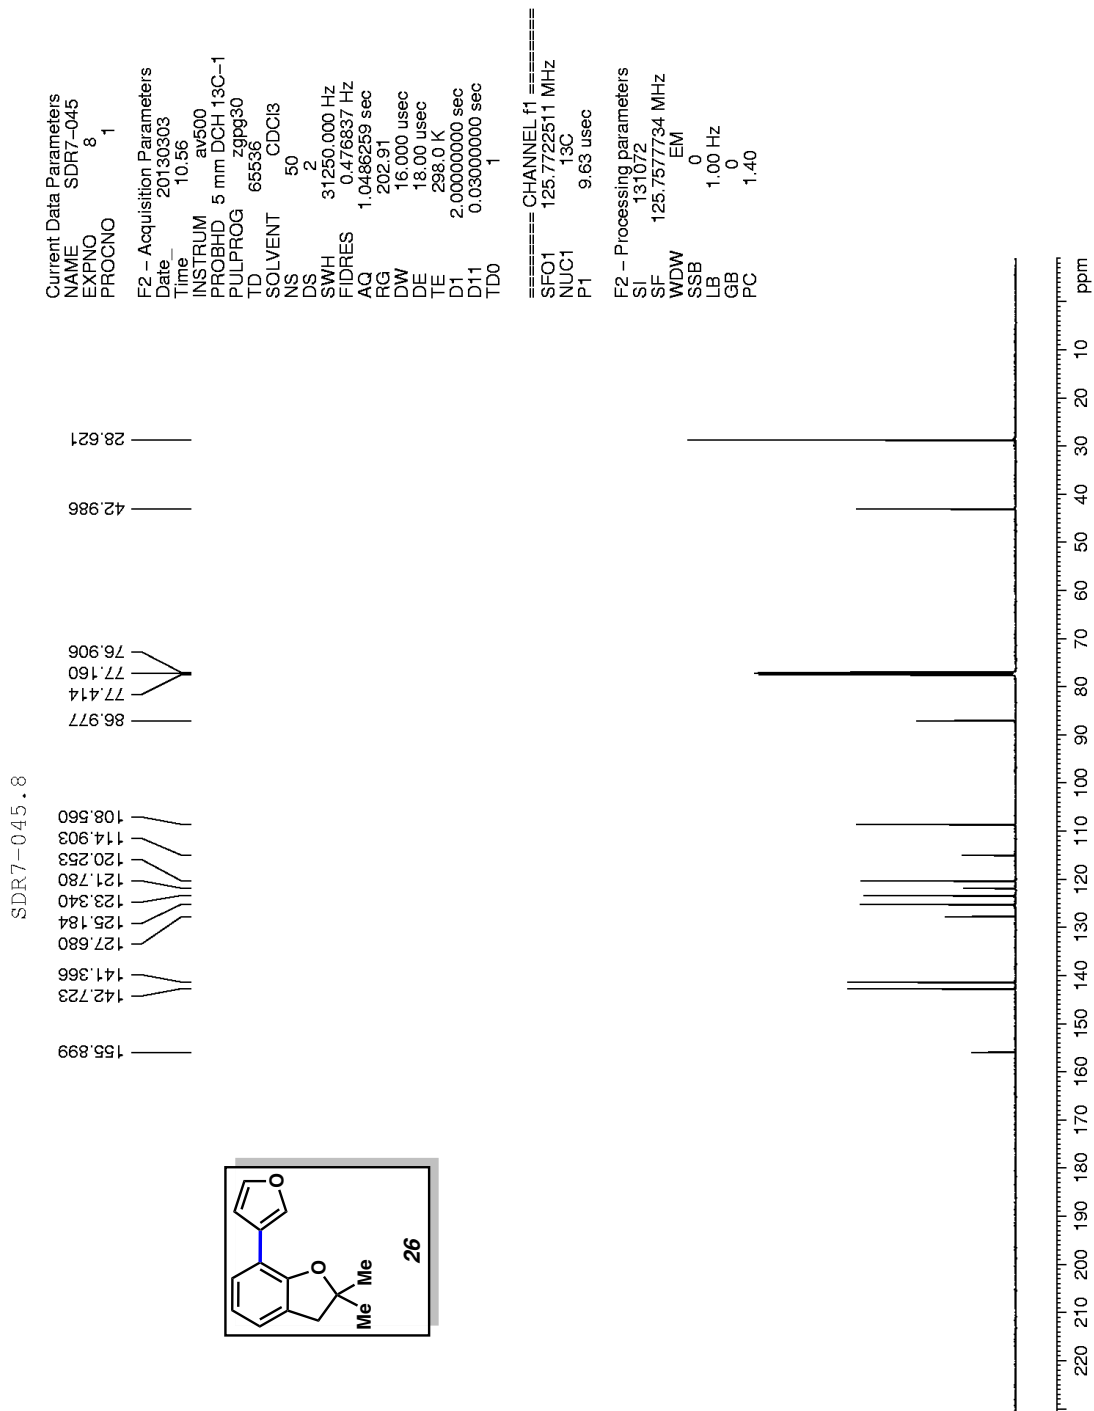

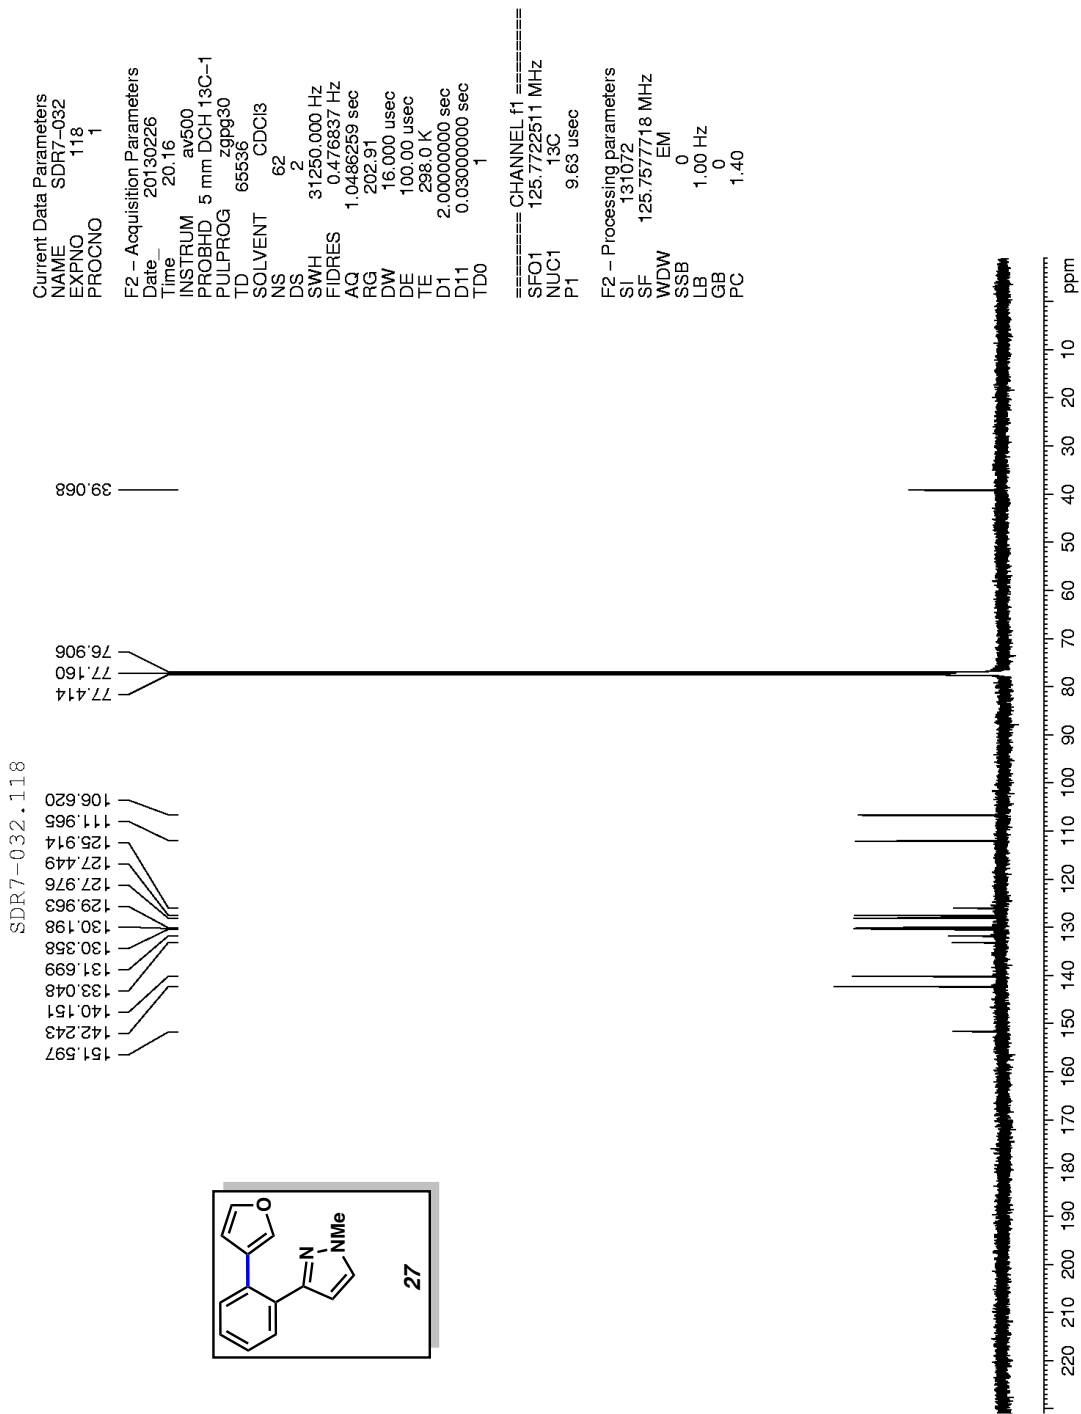

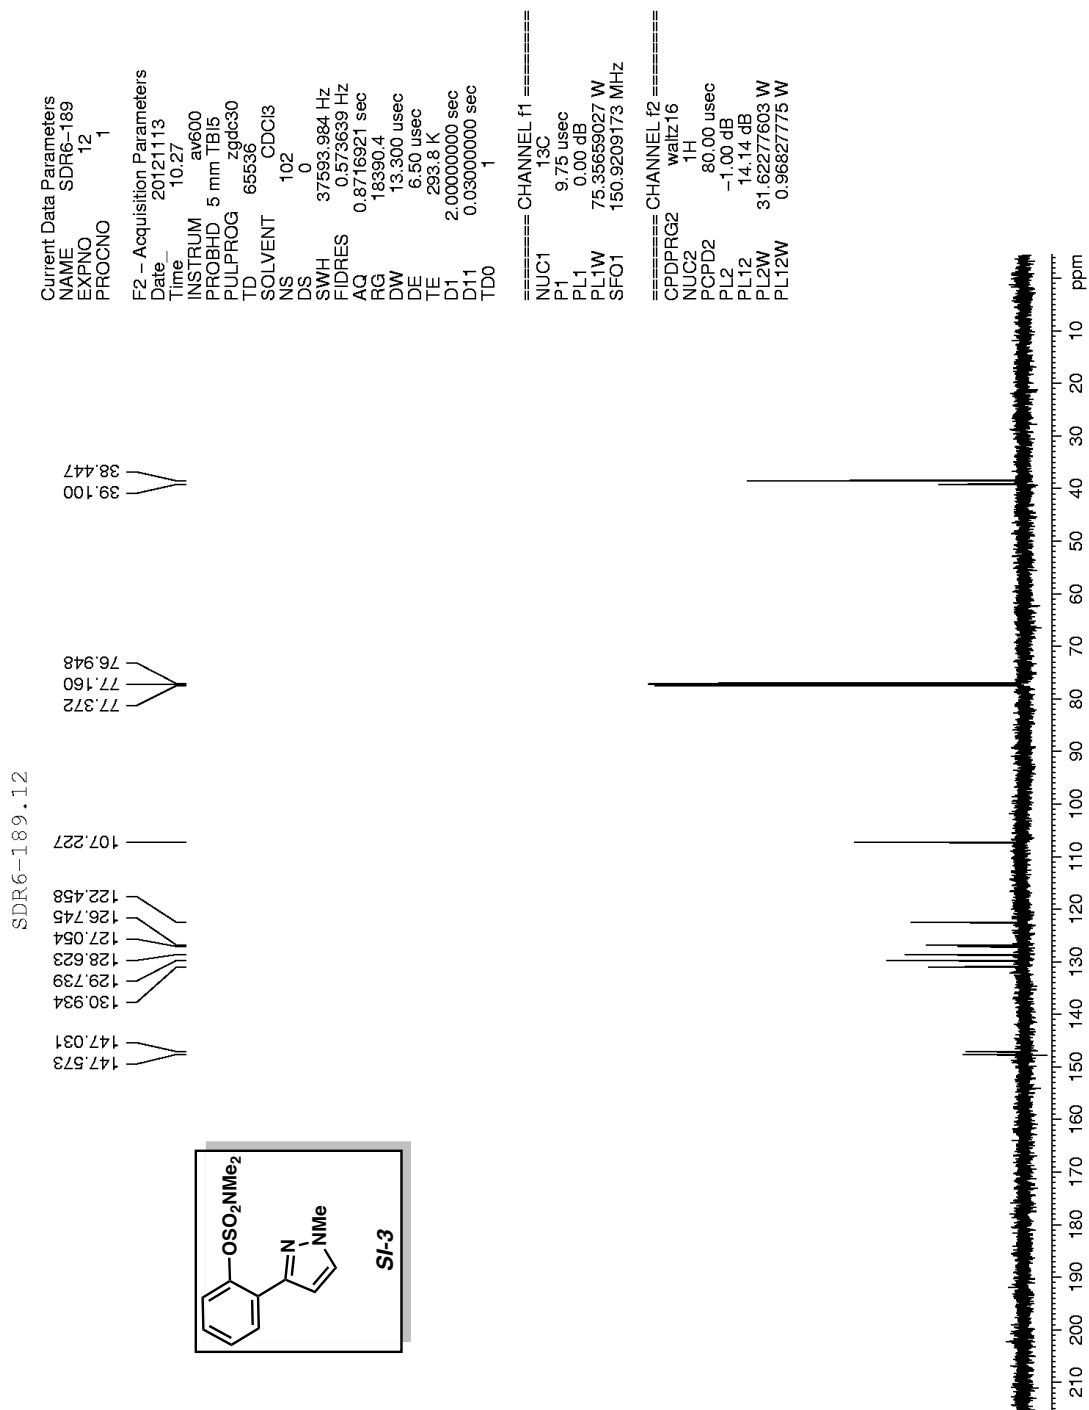

Supplement: NIHMS508899-supplement-1_si_001.pdf [file NIHMS508899-supplement-1_si_001.pdf]
